# Supplementary material for: Camu Camu effects on microbial translocation and systemic immune activation in ART-treated people living with HIV: protocol of the single-arm non-randomised Camu Camu prebiotic pilot study (CIHR/CTN PT032)
Source: PubMed Central journal article supplement — BMJ Open. 2022 Jan 17;12(1):e053081. doi: 10.1136/bmjopen-2021-053081 (PMC8765027; doi:10.1136/bmjopen-2021-053081), 2022-01-17
Supplement: bmjopen-2021-053081.draft_revisions.pdf [file bmjopen-2021-053081.draft_revisions.pdf]

# BMJ Open

BMJ Open is committed to open peer review. As part of this commitment we make the peer review history of every article we publish publicly available.

When an article is published we post the peer reviewers' comments and the authors' responses online. We also post the versions of the paper that were used during peer review. These are the versions that the peer review comments apply to.

The versions of the paper that follow are the versions that were submitted during the peer review process. They are not the versions of record or the final published versions. They should not be cited or distributed as the published version of this manuscript.

BMJ Open is an open access journal and the full, final, typeset and author-corrected version of record of the manuscript is available on our site with no access controls, subscription charges or pay-per-view fees (<http://bmjopen.bmj.com>).

If you have any questions on BMJ Open's open peer review process please email [info.bmjopen@bmj.com](mailto:info.bmjopen@bmj.com)

# BMJ Open

## Camu Camu effects on microbial translocation and systemic immune activation in ART-treated people living with HIV: protocol of the single-arm non-randomised Camu Camu prebiotic pilot study (CIHR/CTN PT032)

|                               |                                                                                                                                                                                                                                                                                                                                                                                                                                                                                                                                                                                                                                                                                                                                                                                                                                                                                                                                                                                                                                                                                                                                                                                                                                                                                                                                                                                                                                                                                                                                                                                                                                                                                                                                                                           |
|-------------------------------|---------------------------------------------------------------------------------------------------------------------------------------------------------------------------------------------------------------------------------------------------------------------------------------------------------------------------------------------------------------------------------------------------------------------------------------------------------------------------------------------------------------------------------------------------------------------------------------------------------------------------------------------------------------------------------------------------------------------------------------------------------------------------------------------------------------------------------------------------------------------------------------------------------------------------------------------------------------------------------------------------------------------------------------------------------------------------------------------------------------------------------------------------------------------------------------------------------------------------------------------------------------------------------------------------------------------------------------------------------------------------------------------------------------------------------------------------------------------------------------------------------------------------------------------------------------------------------------------------------------------------------------------------------------------------------------------------------------------------------------------------------------------------|
| Journal:                      | <i>BMJ Open</i>                                                                                                                                                                                                                                                                                                                                                                                                                                                                                                                                                                                                                                                                                                                                                                                                                                                                                                                                                                                                                                                                                                                                                                                                                                                                                                                                                                                                                                                                                                                                                                                                                                                                                                                                                           |
| Manuscript ID                 | bmjopen-2021-053081                                                                                                                                                                                                                                                                                                                                                                                                                                                                                                                                                                                                                                                                                                                                                                                                                                                                                                                                                                                                                                                                                                                                                                                                                                                                                                                                                                                                                                                                                                                                                                                                                                                                                                                                                       |
| Article Type:                 | Protocol                                                                                                                                                                                                                                                                                                                                                                                                                                                                                                                                                                                                                                                                                                                                                                                                                                                                                                                                                                                                                                                                                                                                                                                                                                                                                                                                                                                                                                                                                                                                                                                                                                                                                                                                                                  |
| Date Submitted by the Author: | 05-May-2021                                                                                                                                                                                                                                                                                                                                                                                                                                                                                                                                                                                                                                                                                                                                                                                                                                                                                                                                                                                                                                                                                                                                                                                                                                                                                                                                                                                                                                                                                                                                                                                                                                                                                                                                                               |
| Complete List of Authors:     | <p>Isnard, Stéphane; Research Institute of the McGill University Health Centre; McGill University Health Centre, Department of Medicine Fombuena, Brandon; Research Institute of the McGill University Health Centre; McGill University Health Centre, Department of Medicine Ouyang, Jing; Research Institute of the McGill University Health Centre; McGill University Health Centre, Department of Medicine Lin, John; Research Institute of the McGill University Health Centre; McGill University Health Centre, Department of Medicine Royston, Léna; Research Institute of the McGill University Health Centre; McGill University Health Centre, Department of Medicine Bu, Simeng; Research Institute of the McGill University Health Centre; McGill University Health Centre, Department of Medicine Sheehan, Nancy; McGill University Health Centre, Department of Medicine</p> <p>Lakatos, Péter; McGill University</p> <p>Bessissow, Talat; McGill University</p> <p>Chomont, Nicolas; Centre de Recherche du CHUM and Department of microbiology, infectiology and immunology, Université de Montréal</p> <p>Klein, Marina; Research Institute of the McGill University Health Centre</p> <p>Lebouché, Bertrand; Chronic Viral Illness Service, McGill University Health Centre; Department of Family Medicine, McGill University</p> <p>Costiniuk, C; McGill University, Chronic Viral Illness Service</p> <p>Routy, Bertrand; Centre Hospitalier de l'Université de Montréal Centre de Recherche</p> <p>Marette, André; McGill University Health Centre, Department of Family Medicine; Laval University</p> <p>Routy, Jean-Pierre; Research Institute of the McGill University Health Centre; McGill University Health Centre, Department of Medicine</p> |
| Keywords:                     | HIV & AIDS < INFECTIOUS DISEASES, Inflammatory bowel disease < GASTROENTEROLOGY, Nutritional support < GASTROENTEROLOGY, IMMUNOLOGY                                                                                                                                                                                                                                                                                                                                                                                                                                                                                                                                                                                                                                                                                                                                                                                                                                                                                                                                                                                                                                                                                                                                                                                                                                                                                                                                                                                                                                                                                                                                                                                                                                       |
|                               |                                                                                                                                                                                                                                                                                                                                                                                                                                                                                                                                                                                                                                                                                                                                                                                                                                                                                                                                                                                                                                                                                                                                                                                                                                                                                                                                                                                                                                                                                                                                                                                                                                                                                                                                                                           |

1  
2  
3  
4  
5  
6  
7  
8  
9  
10  
11  
12  
13  
14  
15  
16  
17  
18  
19  
20  
21  
22  
23  
24  
25  
26  
27  
28  
29  
30  
31  
32  
33  
34  
35  
36  
37  
38  
39  
40  
41  
42  
43  
44  
45  
46  
47  
48  
49  
50  
51  
52  
53  
54  
55  
56  
57  
58  
59  
60

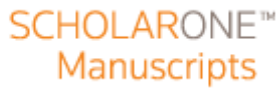

1  
2  
3 **Camu Camu effects on microbial translocation and systemic immune activation in ART-**  
4 **treated people living with HIV: protocol of the single-arm non-randomised Camu Camu**  
5 **prebiotic pilot study (CIHR/CTN PT032)**  
6

7  
8 Stéphane Isnard<sup>1,2,3</sup>, Brandon Fombuena<sup>1,2</sup>, Jing Ouyang<sup>1,2,4</sup>, John Lin<sup>1,2</sup>, Léna Royston<sup>1,2</sup>, Simeng  
9 Bu<sup>1,2</sup>, Nancy Sheehan<sup>2</sup>, Peter L. Lakatos<sup>5</sup>, Talat Bessissow<sup>5</sup>, Nicolas Chomont<sup>6</sup>, Marina B.  
10 Klein<sup>1,2</sup>, Bertrand Lebouché<sup>1,2,7,8</sup>, Cecilia T Costiniuk<sup>1,2</sup>, Bertrand Routy<sup>6</sup>, André Marette<sup>8,9</sup>, Jean  
11 Pierre Routy<sup>1,2,11\*</sup>, For the Camu Camu Study Group  
12  
13

14  
15 <sup>1</sup> Infectious Diseases and Immunity in Global Health Program, Research Institute, McGill  
16 University Health Centre, Montréal, QC, Canada,

17 <sup>2</sup> Department of Medicine, Division of Infectious diseases and Chronic Viral Illness Service,  
18 McGill University Health Centre, Montréal, QC, Canada,

19 <sup>3</sup> CIHR Canadian HIV Trials Network, Vancouver, BC, Canada

20 <sup>4</sup> Chongqing Public Health Medical Center, Chongqing, China,

21 <sup>5</sup> Division of Gastroenterology, McGill University Health Center, Montréal, QC, Canada

22 <sup>6</sup> Centre de Recherche du Centre Hospitalier de l'Université de Montréal, Montréal, QC, Canada

23 <sup>7</sup> Centre for Outcomes Research and Evaluation, Research Institute of the McGill University  
24 Health Centre, Montréal, QC, Canada

25 <sup>8</sup> Department of Family Medicine, McGill University Health Centre, Montréal, QC, Canada

26 <sup>8</sup> Institute of Nutrition and Functional Foods, Laval University, Québec City, QC, Canada

27 <sup>9</sup> Department of Medicine, Faculty of Medicine, Cardiology Axis of the Québec Heart and Lung  
28 Institute, Laval University, Québec City, QC, Canada

29 <sup>11</sup> Division of Hematology, McGill University Health Centre, Montréal, QC, Canada  
30  
31  
32  
33  
34  
35  
36  
37

38 **Correspondence:**

39 **Jean-pierre.routy@mcgill.ca**  
40  
41  
42  
43  
44  
45  
46  
47  
48  
49  
50  
51  
52  
53  
54  
55  
56  
57  
58  
59  
60

## **ABSTRACT (249 words)**

### **Introduction**

Despite the success of antiretroviral therapy (ART) in transforming HIV disease into a chronic infection, people living with HIV (PLWH) remain at risk for various non-AIDS inflammatory comorbidities. Risk of non-AIDS comorbidities is associated with gut dysbiosis, epithelial gut damage and subsequent microbial translocation, and increased activation of both circulating CD4+ and CD8+ T-cells. Therefore, in addition to ART, novel gut microbiota-modulating therapies could aid in reducing inflammation and immune activation, gut damage, and microbial translocation. Amongst various gut-modulation strategies under investigation, the Amazonian fruit Camu Camu (CC) presents itself as a prebiotic candidate based on its anti-inflammatory and antioxidant properties in animal models and tobacco smokers.

### **Method and analysis**

A total of 22 PLWH on ART for more than 2 years, with a viral load <50 copies/mL, a CD4+ count >200 and a CD4+/CD8+ ratio <1 (suggesting increased inflammation and risk for non-AIDS comorbidities), will be recruited in a single arm, non-randomized, interventional pilot trial. We will assess tolerance and effect of supplementation with CC in ART-treated PLWH on reducing gut damage, microbial translocation, inflammation, and HIV latent reservoir by various assays.

### **Ethics and dissemination**

The Canadian Institutes of Health Research (CIHR)/Canadian HIV Trials Network (CTN) pilot trial protocol CTNPT032 was approved by the Natural and Non-prescription Health Products Directorate of Health Canada and the research ethics board of the McGill university Health Centre committee (number 2020-5903). Results will be made available as a free access through publications in peer reviewed journals and through the CIHR/CTN website.

### **Trial registration number**

ClinicalTrials.gov: NCT04058392

## KEYWORDS

Camu Camu; HIV; Antiretroviral therapy; Prebiotic; Gut microbiota; gut mucosa; Inflammation.

## ARTICLE SUMMARY: STRENGTHS AND LIMITATIONS OF THIS STUDY

- Camu camu (CC) is an Amazonian rainforest fruit which has been shown to have anti-inflammatory and gut microbiota-modulating properties in mice.
- The Camu Camu study seeks to confirm mouse model findings on systemic inflammation and immune activation, gut dysbiosis and damage, and subsequent microbial translocation in antiretroviral therapy (ART)-treated people living with HIV (PLWH).
- We hypothesize that treatment with CC will beneficially impact ART-treated PLWH by improving their gut microbiota composition, reducing microbial translocation, reducing inflammation to potentially decreasing latent HIV reservoir size and the risk to develop non-AIDS comorbidities.
- Changes induced by CC treatment will be assessed by plasma markers of gut damage, microbial translocation, inflammation, percentage of activated T-cells, HIV reservoir size and gut bacterial taxa.
- This pilot trial with 22 ART-treated PLWH, will provide sufficient data for future sample size calculations to confirm the effect of CC in more definitive larger studies.

**Main text (3899 words)****INTRODUCTION****Antiretroviral therapy inhibits viral replication without eradication.**

Antiretroviral therapy (ART) successfully controls Human Immunodeficiency Virus (HIV) infection by inhibiting viral replication and has significantly improved the life expectancy of people living with HIV (PLWH) while eliminating transmission to others. However, ART-treated PLWH remain at risk for developing inflammatory non-AIDS comorbidities such as cardiovascular diseases, fatty liver, neurocognition dysfunction and cancer (1, 2). These non-AIDS comorbidities are associated with persistent immune activation and increase with aging, co-infections like cytomegalovirus (CMV) and viral hepatitis as well as microbial translocation. It has been observed in HIV infection and inflammatory bowel disease that abnormal composition of the gut microbiota called “dysbiosis”, alteration of the gut barrier, T-helper (Th) 17 cell dysfunction and microbial translocation lead to systemic inflammation and immune activation contributing to non-AIDS comorbidities (3-9). Long-term HIV control by ART appears to only partially reduce inflammation and poorly replenishes Th17 protective mucosal function, highlighting the importance of research on gut microbiota and the epithelial barrier. Furthermore, despite control of HIV replication, persistent HIV infection in long-lived memory CD4+ T-cells and likely macrophages also contribute to inflammation and microbial translocation, creating a vicious cycle nurturing inflammation. Importantly, the size of the HIV reservoir has been linked to the level of inflammation and immune activation measured in CD8+ T-cells and macrophages (3, 10). Conversely, it remains unknown whether the reduction of inflammation can lead to a decrease in the size of the HIV reservoir.

**Gut damage and immune activation**

As HIV is not cleared with ART, persistent viral products and inflammation subsequently impair antigen-specific T-cell responses. This overall activation leads to the exhaustion of the immune system, including T-cells. This distinctive feature from other chronic viral infections is relevant as HIV replicates preferentially in Th17 CD4+ T-cells residing in the gut, leading to cell death and mucosa damage (11-13). Microbial products penetrate the damaged gut barrier and pass into the systemic circulation. Such microbial translocation contributes to systemic immune activation,

1  
2  
3 disease progression, and development of non-AIDS comorbidities (14-17). Markers of bacterial  
4 translocation, including lipopolysaccharide (LPS), LPS binding protein (LBP), and soluble CD14  
5 (sCD14) have been correlated with immune activation and disease progression (3, 11, 18, 19).  
6  
7 While bacterial translocation is thought to be a major cause of immune activation, we have shown  
8 that circulating beta-D-glucan (BDG), a marker of fungal translocation, also contributes to the  
9 immune activation in an LPS-independent manner (20, 21).

10  
11  
12  
13 Although ART suppresses HIV replication to undetectable levels, microbial translocation  
14 and Th17 damage remain, contributing to persistent immune activation. Local gut inflammation  
15 has been associated with HIV reservoir size (22). Monocytes/macrophages, Dendritic cells, and  
16 Natural Killer (NK) cells detect microbial products in the mesenteric lymph nodes and in systemic  
17 circulation, secreting pro-inflammatory cytokines (interleukin (IL)-1 $\beta$ , IL-8, tumor necrosis factor  
18 (TNF)- $\alpha$ ). These cytokines drive CD4+ T-cell activation, leading to elevated expression of the  
19 HIV co-receptor C-C Chemokine receptor (CCR) 5 and the gut homing receptor CCR6 (23). Th17  
20 measured by CD4+ T-cells expressing CCR6 have then been shown by our group to be  
21 preferentially infected by HIV (12, 13, 24).

### 30 31 **Gut microbiota, dysbiosis and immune regulation**

32 The gut microbiota composition and metabolites play an important role in inflammation in obesity,  
33 diabetes, cancer, and HIV infection. Its role includes food and metabolite processing, microbial  
34 regulation, and immune regulation (25-28). PLWH, compared to uninfected controls, present with  
35 a dysbiosis characterized by a lower abundance of Firmicutes and more abundant Proteobacteria  
36 in their gut microbiota. In addition lack of *Lactobacilli* in stools is associated with lower CD4+ T-  
37 cell count and a higher levels of systemic immune activation (29). Moreover, lower levels of  
38 *Akkermansia muciniphila* have been observed in PLWH. Dysbiosis combined with microbial  
39 translocation has been linked to non-AIDS comorbidities in HIV-infected individuals and  
40 influences CD4+ T-cell recovery on ART as reported by our group and others (3, 14, 18, 30, 31).

### 48 49 50 ***Akkermansia muciniphila* in health and disease**

51 *Akkermansia muciniphila* (*A. muciniphila*) is a gram-negative, strict anaerobe and mucin-  
52 degrading bacterium that colonizes the gut of humans and rodents. *A. muciniphila* represents 1-  
53 5% of all intestinal bacteria. This bacterium acts as a shield on the gut epithelial barrier and has  
54  
55  
56  
57  
58  
59  
60



1  
2  
3 been shown to reduce insulin resistance in obese individuals (26, 32-36). Lower abundance of *A.*  
4 *muciniphila* has been found in the feces of patients with inflammatory bowel disease (IBD) and  
5 individuals with obesity, when compared to feces of healthy individuals (25, 26). Furthermore,  
6 oral administration of *A. muciniphila* to mice fed a high-fat diet alleviates obesity, reduces LPS in  
7 the circulation and alleviates insulin resistance (26, 37, 38).  
8  
9

10  
11  
12 Additionally, patients with lung and renal cell carcinoma responding to anti-PD-1  
13 treatment were more prone to have an elevated abundance of gut *A. muciniphila* compared to non-  
14 responders (28). To go beyond association, B. Routy *et al.* transferred the microbiota from  
15 responders and non-responders into germ-free mice and observed a tumor response only in mice  
16 with a *A. muciniphila* rich human fecal microbiota from the responders (28). Both *in vitro* and *in*  
17 *vivo*, *A. muciniphila* has been shown to increase mucus secretion by goblet cells and gut epithelium  
18 integrity contributing to the prevention of other bacterial products from passing into the circulation  
19 (35, 38, 39). Moreover, oral administration *A. muciniphila* was shown to successfully elevate key  
20 anti-aging and anticancer metabolites primarily in the gut and liver (40).  
21  
22  
23  
24  
25  
26

27  
28 Based on these encouraging results, different attempts have been made to increase *A.*  
29 *muciniphila* in the gut. Everard *et al.* showed that pasteurized *A. muciniphila* increased mucus  
30 thickness, decreased LPS translocation, and reduced metabolic syndrome in obese mice. In  
31 contrast, heat-killed *A. muciniphila* did not protect mice from obesity (38). However, such  
32 pasteurized strains are costly, difficult to produce and may not last after oral administration.  
33  
34  
35  
36  
37

### 38 **The Amazonian fruit Camu Camu**

39  
40 Camu Camu (CC), also named *Myriciaria dubia*, is an Amazon rainforest fruit with antioxidant  
41 and anti-inflammatory properties. Anhê *et al.* showed that polyphenol-rich cranberry and CC  
42 extracts protect mice from diet-induced obesity and intestinal inflammation in association with  
43 increased *A. muciniphila* in the gut microbiota (32-35). CC was more efficient at reducing the  
44 amount of LPS in plasma than cranberry extract in the diet-induced model of obesity, and it was  
45 also found to increase other beneficial microbes in addition to *A. muciniphila*. Other studies have  
46 shown that polyphenols could favor *A. muciniphila* in the gut (26, 41, 42). Importantly, CC extracts  
47 also decreased C-Reactive protein (CRP), IL-6 and IL-8 in the plasma of healthy tobacco smokers  
48 (43). CC is considered a “super fruit” which is widely available in many Canadian health food  
49  
50  
51  
52  
53  
54  
55  
56  
57  
58  
59  
60

1  
2  
3 stores in either powder or capsule form. CC products have been used as a nutritional supplement  
4 that is well tolerated in humans (44).  
5

6  
7 CC is a fruit rich in polyphenols and has been shown in mouse model of inflammation-  
8 related diseases to reduce inflammation and improve gut microbiota with increased *A. muciniphila*  
9 and other beneficial bacteria (32-35). However, no studies have been performed to test CC in  
10 PLWH. Moreover, PLWH on ART have been shown to exhibit persistent dysbiosis, an altered gut  
11 microbiota composition, along with microbial translocation which can cause non-AIDS  
12 comorbidities and hamper CD4+ T-cell recovery (3, 14, 18, 30). Therefore, we will evaluate if the  
13 polyphenol rich CC can positively affect PLWH on ART in terms of reducing inflammation,  
14 improving gut microbiota and potentially decreasing HIV persistent reservoir.  
15  
16  
17  
18  
19  
20  
21

## 22 **Objective**

23  
24 To determine the feasibility and suitable design of a full-scale study on the effect of Camu Camu  
25 in ART-treated PLWH, we designed a non-randomized, single arm, interventional study.  
26  
27  
28

## 29 **Primary outcomes**

30  
31 The primary outcome of this study will be to evaluate the effect of CC on the reduction of the  
32 plasma marker of microbial translocation LPS, assessed using ELISA.  
33  
34  
35

## 36 **Secondary outcomes**

37  
38 The secondary outcomes of this study will be changes in the following before and after 12 weeks  
39 of CC intake, and after 8 weeks of CC discontinuation:  
40

- 41 • Safety and tolerability of CC measured by evaluating adverse events, hematology, and  
42 serum chemistries over the course of the study. These evaluations will include HIV viral  
43 load, glucose levels, a lipid profile and plasma levels of hsCRP and D-dimer.  
44
- 45 • Gut barrier integrity markers I-FABP and sST2, measured by ELISA.  
46
- 47 • Microbial translocation marker (1-3)- $\beta$ -D-Glucan (BDG) assessed using the Fungitell  
48 assay.  
49
- 50 • Pro-inflammatory markers (IL-1 $\beta$ , IL-6, IL-8, IL-18, IP-10, IL-17A and F, IL-22, and  
51 soluble CD14) and anti-inflammatory markers (IL-10) assessed by ELISA.  
52  
53  
54  
55  
56  
57  
58  
59  
60

- T-cell and monocyte activation levels assessed by flow cytometry using markers CD38, HLA-DR and PD-1.
- *A. muciniphila* levels in stools using qPCR.
- Microbiota composition and diversity in stools assessed using 16s rDNA sequencing.
- HIV reservoir size in blood assessed by PCR.
- Evaluate intra-patient variability using data from two baseline visits, approximately two weeks apart from each other to confirm reliability of baseline results.

### **Exploratory outcomes**

The exploratory outcomes of this study will be the following:

- Difference in HIV reservoir size from Baseline (Visit 0) to 12 weeks post-CC treatment by TILDA, performed on blood samples.
- Changes in other markers of gut damage (including plasma REG3 $\alpha$  (45)), microbial translocation (such as plasma 16S rDNA) and immune activation (T-cell activation, cytokines) in the blood and gut biopsies.

### **Sub-study outcomes**

The sub-study outcomes will be the following:

- Changes in gut mucosa architecture in a subset of participants who will consent to have colon biopsies before and at the end of the 12 weeks of CC treatment.
- Changes in inflammation in gut mucosa biopsy assessed by myeloperoxidase staining before and at the end of the 12 weeks of CC treatment.
- Changes in HIV reservoir size in biopsies using qPCR.
- Association between baseline gut microbiota composition (16S rDNA sequencing), and markers of gut integrity (I-FABP, tissue staining) and inflammation (T-cell activation, inflammatory cytokines).

## **METHODS AND ANALYSIS**

### **Study design, settings, sample size and recruitment strategy**

Trial CTN PT032 is an open label, non-randomized, single arm interventional pilot study (Clinicaltrials.gov NCT04058392); protocol version # 1.3; February 12, 2021. The study sponsor

1  
2  
3 is the Canadian Institutes of Health Research (CIHR) Canadian HIV Trials Network (CTN). The  
4 following study protocol fulfills the requirements of the 2013 Standard Protocol Items:  
5 Recommendations for Interventional Trials guidelines (46, 47).  
6  
7

8 Comparisons and assessment of outcomes will be made through various measures at  
9 baseline, during and after CC use (**figure 1 and table 1**).  
10

11 A total of 22 ART-treated participants living with HIV will be enrolled at the Chronic Viral  
12 Illness Service (CVIS) at the McGill University Health Centre (MUHC), Glen Site, Montreal, QC  
13 and the Ottawa Hospital, General Campus, Infectious Diseases Clinic, Ottawa, ON, Canada. A  
14 convenient sample size of 22 participants was chosen without formal power calculations for this  
15 pilot study, based on the Lilac study design (48, 49) and the study by Inoue *et al.* (43). This sample  
16 size accounts for an estimated loss to follow-up/non-completion of 10% for the study. It can  
17 therefore be estimated that 2 participants may not fully complete the study. There will be an  
18 optional colon biopsy sub-study. For logistical reasons, only participants recruited at the Montreal  
19 site will be given the option to participate in this sub-study, after giving informed consent to  
20 participate in the main study and being shown to be eligible for the main study (after screening).  
21 The sub-study will have a separate informed consent form. The obtained data from this study will  
22 be used for calculation of sample size for future larger studies.  
23  
24  
25  
26  
27  
28  
29  
30  
31

32 Participants will be recruited at two above-mentioned centers in Canada. Both participating  
33 medical clinics provide care to more than 2000 HIV-infected persons. Teleconferences and face-  
34 to-face meetings will be organized between the Qualified Investigators and study staff to help  
35 promote patient recruitment and follow-up during the study.  
36  
37  
38  
39  
40

### 41 **Inclusion criteria**

42 Participants will be eligible for the study if they meet the following criteria: (1) Male or female  
43 adults  $\geq 18$  years of age; (2) Documented HIV-1 infection by Western Blot, Enzyme Immuno  
44 Assay (EIA) or viral load assay; (3) On ART for at least 2 years, and stable ART regimen (same  
45 prescription) for at least 3 months to ensure a stabilization of inflammation markers; (4) Persistent  
46 undetectable viral load  $< 50$  copies/ml for the past 2 years. One viral blip are allowed if preceded  
47 and followed by a HIV viremia below 50 copies/ml; (5) CD4+ count  $> 200$  and a CD4+/CD8+ ratio  
48  $< 1$ , to recruit participants with increased inflammation and risk for non-AIDS comorbidities; (6)  
49 Able to communicate adequately in either French or English; (7) Able and willing to provide  
50  
51  
52  
53  
54  
55  
56  
57  
58  
59  
60

1  
2  
3 written informed consent prior to screening; (8) As the influence of CC on pregnant women is  
4 unknown, women of childbearing potential must have a negative serum pregnancy test; (9) Women  
5 of childbearing potential must agree to use an approved methods of birth control while in the study  
6 and until 2 weeks after completion of the study; (10) Women of non-child-bearing potential as  
7 defined as either post-menopausal (12 months of spontaneous amenorrhea and  $\geq 45$  years of age)  
8 or physically incapable of becoming pregnant with documented tubal ligation, hysterectomy or  
9 bilateral oophorectomy; (11) Sexually active men with a female partner of childbearing potential  
10 must agree to use an approved methods of birth control.  
11  
12  
13  
14  
15  
16  
17  
18

### 19 **Exclusion criteria**

20 Participants will not be eligible to participate in the study if they meet any of the following  
21 conditions: (1) Known allergy/hypersensitivity to Camu Camu; (2) Current AIDS-related event or  
22 serious health condition including systemic infections in the last 3 months; (3) Severe systemic  
23 diseases (e.g. uncontrolled hypertension, chronic renal failure), or active uncontrolled infections;  
24 (4) Co-infection with active Hepatitis B or C Virus; (5) Current use or have used in the past 3  
25 months: immune-modulatory agents, prophylactic antibiotics(41)/antibiotics, proton pump  
26 inhibitors, or Morphine as these drugs modulate gut microbiota; (6) Current use of aluminum  
27 containing phosphate binders, chemotherapeutics, niacin, anticoagulant and protease inhibitors  
28 (including in their ART-regimen) as increased vitamin-C levels can prevent the activity of those  
29 molecules; (7) Diagnosis of diabetes mellitus ( $HbA1c \geq 6.5\%$ ) as defined by the Canadian Clinical  
30 Practice Guidelines for the Prevention and Management of Diabetes (50); (8) Frequent use of  
31 probiotics or polyphenol-rich prebiotics (e.g. cranberry and CC powders and/or capsules) in the  
32 last 12 months; (9) Recent changes in dietary habits, intermittent fasting, chronic constipation or  
33 laxative use as these can affect gut microbiota; (10) Psychiatric or cognitive disturbance or any  
34 illness that could preclude compliance with the study; (11) Current participation in an experimental  
35 therapy study or receipt of experimental therapy within the last 6 months; (12) Women who are  
36 planning to become or who are pregnant, or breast-feeding; (13) A score of higher than 8 on a Full  
37 AUDIT questionnaire at the screening visit, suggesting an alcohol abuse problem.  
38  
39  
40  
41  
42  
43  
44  
45  
46  
47  
48  
49  
50  
51  
52  
53  
54  
55  
56  
57  
58  
59  
60

### Study intervention

Participants will be instructed to take 1000 mg of Camu C<sup>TM</sup> (provided by Natural Traditions, Canada) once daily administered as two 500 mg oral capsules for 12 weeks. Capsules will be taken at the same time each day with a meal, preferentially breakfast. Camu C<sup>TM</sup> can be taken with ART as no interactions are expected. The 1000 mg dose is based on the dose given to mice per mean body weight divided by 12.3 as per the Food and Drug Administration (FDA) equation to determine equivalent dosing in human vs. mice, and consistent with Health Canada's recommendations of 1-3 capsules daily (51, 52).

The interaction between CC and other medication is unknown. CC has a high vitamin C concentration and therefore any drug with negative interactions with vitamin C were included in the exclusion criteria. The vitamin C in CC could interact with aluminum in phosphate binders (possible harmful to kidneys); chemotherapeutics (CC antioxidative properties could reduce the chemotherapeutic drug's effect); protease inhibitors (vitamin C might reduce the effect of antiviral drugs containing protease inhibitors); niacins (vitamin C could reduce niacin's effect); and anticoagulants since high doses of vitamin C can reduce responses to some anticoagulants. Hence, participants will be asked to refrain from using Vitamin C supplements during the study.

Use of street drugs, cigarette smoking, non-prescription medications, and marijuana/cannabis products use will be recorded in questionnaires by a research staff at each visit. Study continuation will be based on the Investigator's judgement. In the 24 hours prior to a study visit participants will be instructed to refrain from using marijuana/cannabis products and limit alcohol to no more than one alcoholic beverage with dinner the night before the study visit as they could influence inflammation markers in blood and gut microbiota in stools.

### Adverse events and toxicity management

During each follow-up visit with the participant, information on adverse events (AEs) will be gathered and documented accordingly. AEs will be graded as mild, moderate, severe, or life-threatening and assessed by causality as probably related, possibly related, unlikely to be related or not related to Camu C<sup>TM</sup>. Stable chronic conditions which are present prior to clinical trial entry and do not worsen are not considered AEs and will be accounted for in the participant's medical history.

1  
2  
3 Risk minimization, management, and assessment procedures have been implemented in  
4 the study to minimize and assess potential risks to participants who participate in this clinical study  
5 with Camu C<sup>TM</sup>. Components include specific study entry and exclusion criteria to ensure that  
6 participants who have underlying characteristics that potentially increase their risk for an adverse  
7 outcome are excluded; monitoring for adverse events for the duration of the study; overview  
8 surveillance by an Independent Data Safety Monitoring Committee (DSMC); risk identification  
9 and mitigation management over the course of the study (and the sub-study).  
10  
11

12  
13  
14  
15 When side effects are perceived to be related to Camu C<sup>TM</sup>, the Investigator can use their  
16 clinical judgment regarding whether to continue or to discontinue the study medication. If Camu  
17 C<sup>TM</sup> treatment is discontinued, the participant will be scheduled for follow-up visit(s) as required  
18 to treat the symptoms or adverse event related to Camu C<sup>TM</sup> intake.  
19  
20  
21  
22

## 23 24 **Clinical and laboratory assessments**

### 25 Assessment of gut damage, microbial translocation, and inflammation

26  
27 To evaluate gut epithelial damage, we and others have validated markers that will be  
28 measured in the plasma by ELISA before, during and after CC intake (11, 53-55). LPS, a common  
29 marker of bacterial translocation (56), soluble Suppression of Tumorigenicity (sST2)(20) and  
30 Intestinal-Fatty Acid Binding Protein (I-FABP) will be measured to assess gut barrier integrity.  
31 Immune activation markers (sCD14) and pro-(IL-1 $\beta$ , IL-6, IL-8, TNF- $\alpha$ ) and anti-inflammatory  
32 (IL-10) cytokines will be quantified (57, 58). Activation of monocytes and CD4<sup>+</sup> and CD8<sup>+</sup> T-  
33 cells will be assessed *ex vivo* by flow cytometry with HLA-DR and CD38 staining. CD4<sup>+</sup> and  
34 CD8<sup>+</sup> T-cells will also be assessed for PD-1 expression as a marker of T-cell exhaustion. Plasma  
35 will be assayed for beta D-glucan as a marker of fungal infection(21, 58). REG3 $\alpha$  and 16S rDNA  
36 as well as other markers of microbial translocation and gut damage may be tested in plasma as  
37 well (45).  
38  
39  
40  
41  
42  
43  
44  
45  
46  
47

### 48 Assessment of microbiota composition

49  
50 qPCR for *A. muciniphila* will be performed on fecal DNA samples as previously described  
51 by our group (48). Gut microbiota composition will be further studied by 16S and 18S rDNA  
52 sequencing to determine the impact on other beneficial microbes (e.g., *Barnesiella* and  
53 *Turicibacter*) known to respond to CC in the obesity mouse model (48).  
54  
55  
56  
57  
58  
59  
60

### Assessment of HIV reservoir size

If differences in microbial translocation and/or inflammation are observed, HIV reservoirs will be quantified in blood and rectal biopsies. HIV DNA (total and integrated) and cell-associated HIV RNA (gag) will be measured in DNA and RNA obtained from isolated CD4+ T-cells from the blood (obtained by negative magnetic selection) and gut biopsies (sorted by flow cytometry). HIV DNA and cell-associated RNA measures will be performed using an ultrasensitive nested qPCR as described previously (59).

In addition, the frequency of cells with inducible proviruses will be measured in isolated CD4+ T-cells from PBMCs using the Tat/rev Induced Limiting Dilution Assay (TILDA) in the laboratory of Dr. Chomont at Baseline Week 0 and End-treatment Week 12 timepoints.

In mucosal biopsies, HIV DNA and RNA will also be quantified and localized by DNA/RNAscope (24, 60).

### Assessment of gut mucosa architecture (optional colon biopsy/sub-study)

Biopsies will be included in paraffin at the MUHC Histopathology core facility. Gut architecture will be monitored by immunochemistry and immunostaining of the epithelial tight junctions (Claudin-3/Occludin)(56). If a diminution in inflammation is noted, myeloperoxidase staining will be performed to allow for the quantification of inflammatory myeloid cells in the gut.

For other analyses, gut cells will be separated from tissues by enzyme digestion using a collagenase-based method as reported previously (61, 62). Briefly, fresh tissue biopsies will be incubated with type II collagenase for 30 minutes at 37°C in a shaking incubator. The resulting lymphocyte suspension will be stained with monoclonal Antibodies (mAbs) against CD3+, CD4+, CD8+, and myeloid markers. The total frequency of activated CD4+ and CD8+ T-cells will be determined by flow cytometry as described above.

### **Statistical analysis**

To examine the change in plasma LPS and soluble CD14 levels relative to baseline, linear mixed effects regression will be used. Time will be considered as a categorical variable in the model to allow flexible modeling of the time trend. All five measurements (two for baseline and three for follow-up visits) will be included as outcome variable in the model. Log transformation of the outcome variable or generalized mixed effects regression will be employed if normality



1  
2  
3 assumption is not satisfied. Changes in plasma markers, percentage of activated T-cells, HIV  
4 reservoir size and bacterial taxa by type in the stools samples relative to baselines will be assessed  
5 in the same fashion.  
6  
7

### 8 9 10 **Patient and public involvement**

- 11 • Initial design of the study was presented to community groups.
- 12 • Compliance questionnaires completed by participants throughout the study will allow for
- 13 an assessment of their respective experiences.
- 14 • Results generated by the study are expected to be published in both formal scientific and
- 15 lay language; however, will not be directly disseminated to study participants.
- 16  
17  
18  
19  
20  
21  
22

### 23 **ETHICS AND DISSEMINATION PLAN**

24 All participants will be given detailed oral and written information about the study. Consent  
25 documents describing in detail the study medication and interventions, study procedures and risks  
26 will be given to each participant and written documentation of informed consent is required prior  
27 to starting study medication/intervention. Participants must sign an informed consent document  
28 that has been approved by a participating center's research ethics board (REB) prior to any  
29 procedures being done specifically for the trial. All potential protocol amendments will be  
30 submitted to Health Canada and the respective research ethics board of the participating centers.  
31 Protocol deviations must first receive ethics approval and be reported to the data safety and  
32 monitoring committee of the CTN by the Investigator. The sole exception is when the suggested  
33 change intends to eliminate an immediate hazard to study participants.  
34  
35  
36  
37  
38  
39  
40  
41  
42  
43

### 44 **Dissemination plan**

45 The results of the trial will be disseminated through the traditional routes of scientific peer-  
46 reviewed publications, through international and national specialist conferences and through the  
47 press release by CTN. An open access journal will be chosen to ensure access to study results to  
48 all. Locally, results from the study will be shared with the McGill community. Study results will  
49 be submitted for publication in the Montréal LGBTQ+ Community journal *Fugues*. Moreover,  
50 both the Sponsor-Investigator and Qualified Investigator will promote the Camu Camu study when  
51 attending or presenting at local, national, and international meetings.  
52  
53  
54  
55  
56  
57  
58  
59  
60

## CONCLUSION

We hypothesize that treatment with CC will beneficially impact ART-treated PLWH by improving the gut microbiota composition, reducing systemic inflammation and immune action, reducing gut damage and microbial translocation, and potentially decreasing latent HIV reservoir size, thus decreasing the risk in developing non-AIDS comorbidities. This pilot trial with 22 ART-treated PLWH will provide sufficient data for future sample size calculations and set the foundation to assess the impact of CC in larger definitive studies.

For peer review only

## Acknowledgments

The authors would like to thank Angie Massicotte, Josee Girouard, Hansi Peiris, Cynthia Dion and Cezar Iovi for their help with coordination. The authors are grateful to members of the CIHR/CTN who's insights paramount in the development of the protocol: Dr Judy Needham, Dr Joanne McBane, as well as Dana Nohynek for her help with regulatory affairs. The authors thank William Chau for building the study database.

## Author statement

Group Authorship/Collaborating Author Names: SI, BF, JO, JL, LR, SB, NS, PLL, TB, NS, MBK, BL, CTC, BR, AM, and JPR, for the Camu Camu Study Group

Contributors: J-PR and SI designed the study, with insights from JO, JL, NS, NC, BR, and AM. BF and SI wrote the manuscript. JL, LR, SB, PLL, TB, NC, MBK, BL, CTC, BR, AM, will participate in data collection and analysis. All authors critically reviewed the manuscript and approved the final version.

## Funding

This study was funded by the Canadian Institutes of Health Research (CIHR) Canadian HIV trials Network (CTN) (CTN PT032 grant to SI and JPR), and by the Canadian HIV Cure Enterprise (CanCURE) (Team Grant HB2-164064 to JPR). Authors who are CTN and/or CanCURE members were involved in the study design and in the writing of the manuscript, and will also be involved in data collection, analysis, and interpretation.

## Conflicts of interest

J-PR has performed contract research and/or served on Advisory Boards for Gilead Sciences Canada, Merck Canada, Abbvie, ViiV Healthcare, Bristol Myers Squibb, Janssen, Argos Pharmaceuticals from InnaVirVax and has served on the Advisory Board of Theravectys. JBA has performed contract research and/or served on Advisory Boards for Gilead Sciences Canada, Merck Canada, Abbvie, ViiV Healthcare, Bristol Myers Squibb, Janssen and Argos Pharmaceuticals. NC has received research funding from EMD Serono and has served on the Advisory Board of Gilead Sciences Canada. SI is a post-doctoral fellow from the Fonds de recherche du Quebec en santé,

1  
2  
3 and from the CIHR/CTN. B.L. is supported by a career award LE 250 from Quebec's Ministry of  
4 Health for researchers in family medicine. BL has received consultancy fees and/or honoraria from  
5 Gilead, Merck, and ViiV, and research funds from Gilead, Merck, and ViiV, support to attend  
6 educational conferences from Viiv Healthcare and Gilead.  
7  
8  
9

### 10 11 **Patient consent for publication**

12 Not required  
13  
14  
15

### 16 **Ethics approval**

17 Canadian Institutes of Health Research/Canadian HIV Trials Network (CTN) pilot trial protocol  
18 CTNPT032. The study was approved by the Natural and Non-prescription Health Products  
19 Directorate of health Canada and the research ethics board of the McGill university Health Centre  
20 committee (number 2020-5903) and will be conducted in accordance with the Declaration of  
21 Helsinki of 1975, as revised in 2000.  
22  
23  
24  
25  
26  
27  
28

### 29 **Data access statement**

30 The data generated by this study will be available from Dr Routy upon reasonable request after  
31 publication.  
32  
33  
34  
35  
36  
37  
38  
39  
40  
41  
42  
43  
44  
45  
46  
47  
48  
49  
50  
51  
52  
53  
54  
55  
56  
57  
58  
59  
60

**Table 1: Schedule of Events.**

| Visit Type                                                                                | Screening      | Study Visits            |                |                        |                   |                         |
|-------------------------------------------------------------------------------------------|----------------|-------------------------|----------------|------------------------|-------------------|-------------------------|
|                                                                                           |                | Baseline 1              | Baseline 2     | Treatment              |                   | Follow-up               |
| Visit Window                                                                              | -8 to -1 weeks | Week -2 ( $\pm 7$ days) | Week 0 (Day 0) | Week 4 ( $\pm 7$ days) | Week 12 (+7 days) | Week 20 ( $\pm 7$ days) |
| <b>Procedures:</b>                                                                        |                |                         |                |                        |                   |                         |
| Visit No.                                                                                 | 1              | 2                       | 3              | 4                      | 5                 | 6                       |
| Informed Consent                                                                          | X              | X                       |                |                        |                   |                         |
| Eligibility Assessment                                                                    | X              | X                       | X              |                        |                   |                         |
| Concomitant Medication                                                                    | X              | X                       | X              | X                      | X                 | X                       |
| Medical History                                                                           | X              |                         |                |                        |                   |                         |
| Complete Physical Exam and Vital Signs                                                    | X              |                         |                |                        |                   |                         |
| Targeted Physical Exam and Vital Signs                                                    |                | X                       | X              | X                      | X                 | X                       |
| Adverse Event Assessment                                                                  |                |                         |                | X                      | X                 | X                       |
| Serum Pregnancy Test                                                                      | X              | X                       | X              | X                      | X                 | X                       |
| Hematology*                                                                               | X              | X <sup>†</sup>          | X              | X                      | X                 | X                       |
| Serum Chemistry**                                                                         | X              | X <sup>†</sup>          | X              | X                      | X                 | X                       |
| Serology***                                                                               | X              |                         | X              |                        |                   |                         |
| HIV-1 Viral Load****                                                                      | X              | X <sup>†</sup>          | X              | X                      | X                 | X                       |
| Immune activation markers/cytokines (ELISA)*****                                          |                | X                       | X              | X                      | X                 | X                       |
| Monocyte and T-cell activation markers <sup>†</sup>                                       |                | X                       | X              | X                      | X                 | X                       |
| Markers of gut barrier integrity, inflammation, and microbial translocation <sup>††</sup> |                | X                       | X              | X                      | X                 | X                       |
| Size of HIV reservoir in Latently Infected CD4 <sup>+</sup> T-cells <sup>†††</sup>        |                | X                       | X              | X                      | X                 | X                       |
| Stool sample collection and microbiota composition <sup>††††</sup>                        |                | X                       | X              | X                      | X                 | X                       |
| Alcohol use questionnaire (AUDIT-Full)                                                    | X              |                         |                |                        |                   |                         |
| Alcohol use questionnaire (AUDIT-C)                                                       |                | X                       | X              | X                      | X                 | X                       |
| Study Product Dispensation                                                                |                |                         | X              |                        |                   |                         |
| Study Product Compliance                                                                  |                |                         |                | X                      | X                 |                         |
| Colon mucosal biopsies <sup>#</sup>                                                       |                |                         | X              |                        | X                 |                         |

1  
2  
3 \*CBC, CD4 and CD8 T-cell counts, erythrocyte sedimentation rate (ESR).

4 \*\*Alkaline phosphatase, ALT, Amylase, AST, Bilirubin (total), Creatine kinase, Creatinine, D-dimer, fasting blood  
5 glucose, HbA1c, high sensitivity C-reactive protein (hsCRP), Lipase, lipid profile (total cholesterol, high density  
6 lipoprotein (HDL), low density lipoprotein (LDL), Triglycerides), serum phosphate, Urea

7 \*\*\*Serology measurements include: Cytomegalovirus (CMV), Hepatitis B virus (HBV), HCV and HIV viral load.  
8 Since HIV viral load will be measured at each visit, it was put as a separate line item.

9 \*\*\*\*Immune activation markers/cytokines include soluble CD14, pro-inflammatory cytokines (IL-1 $\beta$ , IL-6, IL-8,  
10 TNF- $\alpha$ ) and anti-inflammatory cytokine IL-10. Measured in plasma by ELISA.

11 +Monocyte and T-cell activation markers include HLA-DR and CD38. T-cell exhaustion marker: PD-1. Measured  
12 by staining and flow cytometry.

13 ++Markers of gut barrier integrity, microbial translocation, and inflammation: lipopolysaccharide, soluble ST2, I-  
14 FABP (measured in plasma by ELISA).

15 +++PBMCs will be isolated and then latent CD4 T-cells will be isolated by flow cytometry. HIV viral reservoir in  
16 the latent CD4 T-cell population will be measured by nested qPCR. More specific TILDA analysis will be  
17 performed on Baseline Week 0 and End-treatment Week 12 samples to assess the HIV viral reservoir (Exploratory  
18 analysis).

19 ++++qPCR of *A. muciniphila*, 16S and 18S rDNA sequencing for other members of the microbiota.

20 #Optional sub-study procedure.

21 † Not required when the same tests have been performed at the screening visit within the past 14 days, with the  
22 exception of CBC, CD4, CD8 (and serum pregnancy test)

## References

1. Srinivasa S, Grinspoon SK. Metabolic and body composition effects of newer antiretrovirals in HIV-infected patients. *Eur J Endocrinol* 2014;170:R185-202.
2. Deeks SG, Lewin SR, Havlir DV. The end of AIDS: HIV infection as a chronic disease. *Lancet* 2013;382:1525-33.
3. Brenchley JM, Price DA, Schacker TW, et al. Microbial translocation is a cause of systemic immune activation in chronic HIV infection. *Nat Med* 2006;12:1365-71.
4. Douek DC. Immune activation, HIV persistence, and the cure. *Top Antivir Med* 2013;21:128-32.
5. Monnig MA, Kahler CW, Cioe PA, et al. Markers of Microbial Translocation and Immune Activation Predict Cognitive Processing Speed in Heavy-Drinking Men Living with HIV. *Microorganisms* 2017;5.
6. Neff CP, Krueger O, Xiong K, et al. Fecal Microbiota Composition Drives Immune Activation in HIV-infected Individuals. *EBioMedicine* 2018;30:192-202.
7. Sui Y, Dzutsev A, Venzon D, et al. Influence of gut microbiome on mucosal immune activation and SHIV viral transmission in naive macaques. *Mucosal Immunol* 2018;11:1219-29.
8. Vazquez-Castellanos JF, Serrano-Villar S, Latorre A, et al. Altered metabolism of gut microbiota contributes to chronic immune activation in HIV-infected individuals. *Mucosal Immunol* 2015;8:760-72.
9. Zevin AS, McKinnon L, Burgener A, et al. Microbial translocation and microbiome dysbiosis in HIV-associated immune activation. *Curr Opin HIV AIDS* 2016;11:182-90.
10. Clayton KL, Garcia JV, Clements JE, et al. HIV Infection of Macrophages: Implications for Pathogenesis and Cure. *Pathog Immun* 2017;2:179-92.
11. Mehraj V, Jenabian MA, Ponte R, et al. The plasma levels of soluble ST2 as a marker of gut mucosal damage in early HIV infection. *AIDS* 2016;30:1617-27.
12. Gosselin A, Monteiro P, Chomont N, et al. Peripheral blood CCR4+CCR6+ and CXCR3+CCR6+CD4+ T cells are highly permissive to HIV-1 infection. *J Immunol* 2010;184:1604-16.
13. Gosselin A, Wiche Salinas TR, Planas D, et al. HIV persists in CCR6+CD4+ T cells from colon and blood during antiretroviral therapy. *AIDS* 2017;31:35-48.
14. Tincati C, Douek DC, Marchetti G. Gut barrier structure, mucosal immunity and intestinal microbiota in the pathogenesis and treatment of HIV infection. *AIDS Res Ther* 2016;13:19.
15. Deeks SG, Phillips AN. HIV infection, antiretroviral treatment, ageing, and non-AIDS related morbidity. *BMJ* 2009;338:a3172.
16. Gandhi RT, McMahon DK, Bosch RJ, et al. Levels of HIV-1 persistence on antiretroviral therapy are not associated with markers of inflammation or activation. *PLoS Pathog* 2017;13:e1006285.
17. Hoenigl M, Moser CB, Funderburg N, et al. Soluble Urokinase Plasminogen Activator Receptor Is Predictive of Non-AIDS Events During Antiretroviral Therapy-mediated Viral Suppression. *Clin Infect Dis* 2019;69:676-86.
18. Marchetti G, Tincati C, Silvestri G. Microbial translocation in the pathogenesis of HIV infection and AIDS. *Clin Microbiol Rev* 2013;26:2-18.
19. Sandler NG, Douek DC. Microbial translocation in HIV infection: causes, consequences and treatment opportunities. *Nat Rev Microbiol* 2012;10:655-66.

- 1
  - 2
  - 3
  - 4
  - 5
  - 6
  - 7
  - 8
  - 9
  - 10
  - 11
  - 12
  - 13
  - 14
  - 15
  - 16
  - 17
  - 18
  - 19
  - 20
  - 21
  - 22
  - 23
  - 24
  - 25
  - 26
  - 27
  - 28
  - 29
  - 30
  - 31
  - 32
  - 33
  - 34
  - 35
  - 36
  - 37
  - 38
  - 39
  - 40
  - 41
  - 42
  - 43
  - 44
  - 45
  - 46
  - 47
  - 48
  - 49
  - 50
  - 51
  - 52
  - 53
  - 54
  - 55
  - 56
  - 57
  - 58
  - 59
  - 60
20. Mehraj V, Ramendra R, Isnard S, et al. (1-3)-Beta-D-Glucan antigenemia contributes to 1 immune activation during HIV infection. *Clin Infect Dis* 2018:Submitted.
21. Isnard S, Lin J, Simeng B, et al. Gut Leakage of fungal-related products: Turning up the heat for HIV infection *Front Immunol* 2021.
22. Peng X, Isnard S, Lin J, et al. Differences in HIV burden in the inflamed and non-inflamed colon from a person living with HIV and ulcerative colitis. *J Virus Erad* 2021;7:100033.
23. Stevenson M, Stanwick TL, Dempsey MP, et al. HIV-1 replication is controlled at the level of T cell activation and proviral integration. *EMBO J* 1990;9:1551-60.
24. Chomont N, El-Far M, Ancuta P, et al. HIV reservoir size and persistence are driven by T cell survival and homeostatic proliferation. *Nat Med* 2009;15:893-900.
25. Anhe FF, Varin TV, Le Barz M, et al. Gut Microbiota Dysbiosis in Obesity-Linked Metabolic Diseases and Prebiotic Potential of Polyphenol-Rich Extracts. *Curr Obes Rep* 2015;4:389-400.
26. Dao MC, Everard A, Aron-Wisnewsky J, et al. Akkermansia muciniphila and improved metabolic health during a dietary intervention in obesity: relationship with gut microbiome richness and ecology. *Gut* 2016;65:426-36.
27. Sepich-Poore GD, Zitvogel L, Straussman R, et al. The microbiome and human cancer. *Science* 2021;371.
28. Routy B, Le Chatelier E, Derosa L, et al. Gut microbiome influences efficacy of PD-1-based immunotherapy against epithelial tumors. *Science* 2018;359:91-7.
29. Vujkovic-Cvijin I, Somsouk M. HIV and the Gut Microbiota: Composition, Consequences, and Avenues for Amelioration. *Curr HIV/AIDS Rep* 2019;16:204-13.
30. Lu W, Feng Y, Jing F, et al. Association Between Gut Microbiota and CD4 Recovery in HIV-1 Infected Patients. *Front Microbiol* 2018;9:1451.
31. Vujkovic-Cvijin I, Sortino O, Verheij E, et al. HIV-associated gut dysbiosis is independent of sexual practice and correlates with noncommunicable diseases. *Nat Commun* 2020;11:2448.
32. Anhe FF, Roy D, Pilon G, et al. A polyphenol-rich cranberry extract protects from diet-induced obesity, insulin resistance and intestinal inflammation in association with increased Akkermansia spp. population in the gut microbiota of mice. *Gut* 2015;64:872-83.
33. Anhe FF, Nachbar RT, Varin TV, et al. Treatment with camu camu (*Myrciaria dubia*) prevents obesity by altering the gut microbiota and increasing energy expenditure in diet-induced obese mice. *Gut* 2018.
34. Anhe FF, Nachbar RT, Varin TV, et al. A polyphenol-rich cranberry extract reverses insulin resistance and hepatic steatosis independently of body weight loss. *Mol Metab* 2017;6:1563-73.
35. Anhe FF, Pilon G, Roy D, et al. Triggering Akkermansia with dietary polyphenols: A new weapon to combat the metabolic syndrome? *Gut Microbes* 2016;7:146-53.
36. Ouyang J, Lin J, Isnard S, et al. The Bacterium Akkermansia muciniphila: A Sentinel for Gut Permeability and Its Relevance to HIV-Related Inflammation. *Front Immunol* 2020;11:645.
37. Cani PD. Human gut microbiome: hopes, threats and promises. *Gut* 2018;67:1716-25.
38. Everard A, Belzer C, Geurts L, et al. Cross-talk between Akkermansia muciniphila and intestinal epithelium controls diet-induced obesity. *Proc Natl Acad Sci U S A* 2013;110:9066-71.
39. Reunanen J, Kainulainen V, Huuskonen L, et al. Akkermansia muciniphila Adheres to Enterocytes and Strengthens the Integrity of the Epithelial Cell Layer. *Appl Environ Microbiol* 2015;81:3655-62.



- 1
- 2
- 3
- 4 40. Grajeda-Iglesias C, Durand S, Daillère R, et al. Oral administration of Akkermansia
- 5 muciniphila elevates systemic antiaging and anticancer metabolites. *Aging (Albany NY)*
- 6 2021;13:6375-405.
- 7 41. Etxeberria U, Arias N, Boque N, et al. Reshaping faecal gut microbiota composition by the
- 8 intake of trans-resveratrol and quercetin in high-fat sucrose diet-fed rats. *J Nutr Biochem*
- 9 2015;26:651-60.
- 10 42. Li Z, Henning SM, Lee RP, et al. Pomegranate extract induces ellagitannin metabolite
- 11 formation and changes stool microbiota in healthy volunteers. *Food Funct* 2015;6:2487-95.
- 12 43. Inoue T, Komoda H, Uchida T, et al. Tropical fruit camu-camu (*Myrciaria dubia*) has anti-
- 13 oxidative and anti-inflammatory properties. *J Cardiol* 2008;52:127-32.
- 14 44. Langley PC, Pergolizzi JV, Jr., Taylor R, Jr., et al. Antioxidant and associated capacities of
- 15 Camu camu (*Myrciaria dubia*): a systematic review. *J Altern Complement Med* 2015;21:8-14.
- 16 45. Isnard S, Ramendra R, Dupuy FP, et al. Plasma Levels of C-Type Lectin REG3alpha and Gut
- 17 Damage in People With Human Immunodeficiency Virus. *J Infect Dis* 2020;221:110-21.
- 18 46. Chan A-W, Tetzlaff JM, Gøtzsche PC, et al. SPIRIT 2013 explanation and elaboration:
- 19 guidance for protocols of clinical trials. *BMJ : British Medical Journal* 2013;346:e7586.
- 20 47. SPIRIT 2013 Statement: Defining Standard Protocol Items for Clinical Trials. *Annals of*
- 21 *Internal Medicine* 2013;158:200-7.
- 22 48. Isnard S, Lin J, Fombuena B, et al. Repurposing Metformin in Nondiabetic People With
- 23 HIV: Influence on Weight and Gut Microbiota. *Open Forum Infect Dis* 2020;7:ofaa338.
- 24 49. Routy JP, Isnard S, Mehraj V, et al. Effect of metformin on the size of the HIV reservoir in
- 25 non-diabetic ART-treated individuals: single-arm non-randomised Lilac pilot study protocol. *BMJ*
- 26 *Open* 2019;9:e028444.
- 27 50. Committee CDACPE. Diabetes Canada 2018: Clinical Practice Guidelines for the
- 28 Prevention and Management of Diabetes in Canada. *Canadian Journal of Diabetes* 2018;42:S1-
- 29 S325.
- 30 51. Canada H. Camu C 2018 [05 Dec 2018]. Available from: [https://health-](https://health-products.canada.ca/lnhpd-bdpsnh/info.do?licence=80042046)
- 31 [products.canada.ca/lnhpd-bdpsnh/info.do?licence=80042046](https://health-products.canada.ca/lnhpd-bdpsnh/info.do?licence=80042046).
- 32 52. Nair AB, Jacob S. A simple practice guide for dose conversion between animals and
- 33 human. *J Basic Clin Pharm* 2016;7:27-31.
- 34 53. Mehraj V, Ramendra R, Isnard S, et al. Circulating (1->3)-beta-D-Glucan is associated with
- 35 immune activation during HIV infection. *Clin Infect Dis* 2019.
- 36 54. Ramendra R, Isnard S, Mehraj V, et al. Circulating LPS and (1->3)-b-D-Glucan: A folie à
- 37 deux contributing to HIV-associated immune activation. *Frontiers in Immunology* 2019.
- 38 55. Younas M, Psomas C, Mehraj V, et al. Plasma Level of Soluble ST2 in Chronically Infected
- 39 HIV-1 Patients with Suppressed Viremia. *Open AIDS J* 2017;11:32-5.
- 40 56. Ortiz AM, Flynn JK, DiNapoli SR, et al. Experimental microbial dysbiosis does not promote
- 41 disease progression in SIV-infected macaques. *Nat Med* 2018;24:1313-6.
- 42 57. Mehraj V, Ramendra R, Isnard S, et al. CXCL13 as a Biomarker of Immune Activation During
- 43 Early and Chronic HIV Infection. *Front Immunol* 2019;10:289.
- 44 58. Mehraj V, Ramendra R, Isnard S, et al. Circulating (1->3)-beta-D-glucan Is Associated With
- 45 Immune Activation During Human Immunodeficiency Virus Infection. *Clin Infect Dis* 2020;70:232-
- 46 41.
- 47
- 48
- 49
- 50
- 51
- 52
- 53
- 54
- 55
- 56
- 57
- 58
- 59
- 60

- 1  
2  
3 59. Vandergeeten C, Fromentin R, Merlini E, et al. Cross-clade ultrasensitive PCR-based assays  
4 to measure HIV persistence in large-cohort studies. *J Virol* 2014;88:12385-96.  
5  
6 60. Procopio FA, Fromentin R, Kulpa DA, et al. A Novel Assay to Measure the Magnitude of  
7 the Inducible Viral Reservoir in HIV-infected Individuals. *EBioMedicine* 2015;2:874-83.  
8  
9 61. Shacklett BL, Critchfield JW, Ferre AL, et al. Mucosal T-cell responses to HIV: responding  
10 at the front lines. *J Intern Med* 2009;265:58-66.  
11  
12 62. Planas D, Pagliuzza A, Ponte R, et al. LILAC pilot study: Effects of metformin on mTOR  
13 activation and HIV reservoir persistence during antiretroviral therapy. *EBioMedicine*  
14 2021;65:103270.  
15  
16  
17  
18

### 19 Figure legend

#### 20 **Figure 1:** Study flow chart.

21  
22  
23  
24 Visit 1, the Screening visit, will take place 1-8 weeks prior to the second Baseline visit (Week 0,  
25 Visit 3). At the Screening visit the informed consent document will be explained to the  
26 participant and will be signed prior to any screening and study activities. Two Baseline visits will  
27 be conducted, the second one being at Week 0 and all visits after that will be relative to this  
28 Baseline Week 0 Visit (Visit 3, Day 0). Data collected at these two Baseline visits will be  
29 directly compared to determine intra-patient variability. Camu Camu treatment will be a single  
30 daily dose of 1000 mg (2\*500 mg Camu C<sup>TM</sup> capsules) taken with a meal, at the same time each  
31 day for 12 weeks. Treatment and post-treatment visit dates (Visit 4, Week 4 and Visit 6, Week  
32 20) can vary  $\pm 7$  days according to participant and/or research team availability. Visit 5 at Week  
33 12 can vary +7 days to ensure the participant has completed 12 weeks of Camu Camu treatment  
34 prior to the end-of-treatment visit. See Section 8 Schedule of Events (Table 1) to see more test  
35 details.  
36  
37  
38

39 \*The consent form for the optional gut biopsy will also be explained, but consent for this will not  
40 be necessary to be part of the main study. The sub-study is only available to participants at the  
41 Montreal site.  
42  
43

44 #Optional gut biopsies will be taken for the sub-study at indicated time points.  
45  
46  
47  
48  
49  
50  
51  
52  
53  
54  
55  
56  
57  
58  
59  
60

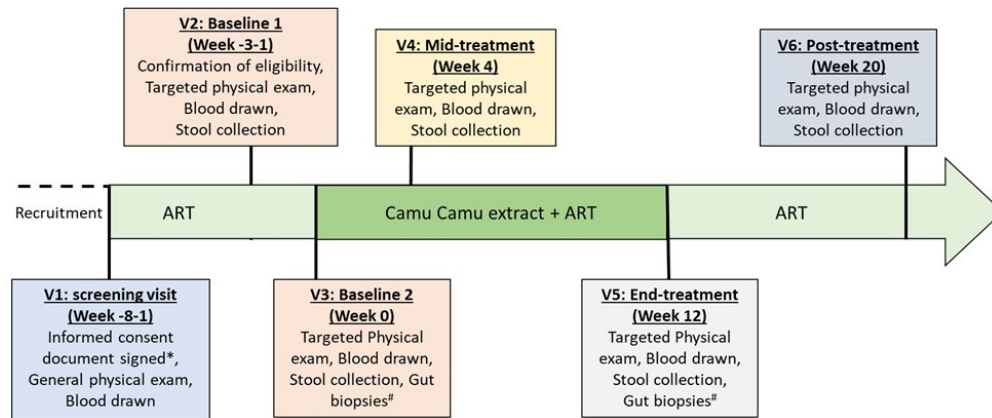

Figure 1: Study flow chart.

Visit 1, the Screening visit, will take place 1-8 weeks prior to the second Baseline visit (Week 0, Visit 3). At the Screening visit the informed consent document will be explained to the participant and will be signed prior to any screening and study activities. Two Baseline visits will be conducted, the second one being at Week 0 and all visits after that will be relative to this Baseline Week 0 Visit (Visit 3, Day 0). Data collected at these two Baseline visits will be directly compared to determine intra-patient variability. Camu Camu treatment will be a single daily dose of 1000 mg (2\*500 mg Camu CTM capsules) taken with a meal, at the same time each day for 12 weeks. Treatment and post-treatment visit dates (Visit 4, Week 4 and Visit 6, Week 20) can vary  $\pm 7$  days according to participant and/or research team availability. Visit 5 at Week 12 can vary +7 days to ensure the participant has completed 12 weeks of Camu Camu treatment prior to the end-of-treatment visit. See Section 8 Schedule of Events (Table 1) to see more test details.

\*The consent form for the optional gut biopsy will also be explained, but consent for this will not be necessary to be part of the main study. The sub-study is only available to participants at the Montreal site.

#Optional gut biopsies will be taken for the sub-study at indicated time points.

164x68mm (150 x 150 DPI)

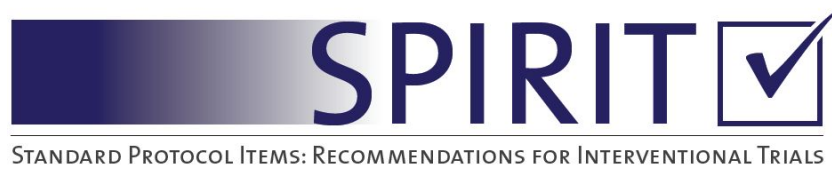

SPIRIT 2013 Checklist: Recommended items to address in a clinical trial protocol and related documents\*

Camu Camu pilot study (CTN PT032). Isnard et al.

| Section/item                      | Item No | Description                                                                                                                                                                                                                                                                              | Page number |
|-----------------------------------|---------|------------------------------------------------------------------------------------------------------------------------------------------------------------------------------------------------------------------------------------------------------------------------------------------|-------------|
| <b>Administrative information</b> |         |                                                                                                                                                                                                                                                                                          |             |
| Title                             | 1       | Descriptive title identifying the study design, population, interventions, and, if applicable, trial acronym                                                                                                                                                                             | 1           |
| Trial registration                | 2a      | Trial identifier and registry name. If not yet registered, name of intended registry                                                                                                                                                                                                     | 2           |
|                                   | 2b      | All items from the World Health Organization Trial Registration Data Set                                                                                                                                                                                                                 | NA          |
| Protocol version                  | 3       | Date and version identifier                                                                                                                                                                                                                                                              | 8           |
| Funding                           | 4       | Sources and types of financial, material, and other support                                                                                                                                                                                                                              | 8, 16       |
| Roles and responsibilities        | 5a      | Names, affiliations, and roles of protocol contributors                                                                                                                                                                                                                                  | 8           |
|                                   | 5b      | Name and contact information for the trial sponsor                                                                                                                                                                                                                                       | 1           |
|                                   | 5c      | Role of study sponsor and funders, if any, in study design; collection, management, analysis, and interpretation of data; writing of the report; and the decision to submit the report for publication, including whether they will have ultimate authority over any of these activities | 8           |
|                                   | 5d      | Composition, roles, and responsibilities of the coordinating centre, steering committee, endpoint adjudication committee, data management team, and other individuals or groups overseeing the trial, if applicable (see Item 21a for data monitoring committee)                         | NA          |
| <b>Introduction</b>               |         |                                                                                                                                                                                                                                                                                          |             |
| Background and rationale          | 6a      | Description of research question and justification for undertaking the trial, including summary of relevant studies (published and unpublished) examining benefits and harms for each intervention                                                                                       | 4-7         |

|    |                                                           |     |                                                                                                                                                                                                                                                                                                                                                                                |                   |
|----|-----------------------------------------------------------|-----|--------------------------------------------------------------------------------------------------------------------------------------------------------------------------------------------------------------------------------------------------------------------------------------------------------------------------------------------------------------------------------|-------------------|
| 1  |                                                           |     |                                                                                                                                                                                                                                                                                                                                                                                |                   |
| 2  |                                                           | 6b  | Explanation for choice of comparators                                                                                                                                                                                                                                                                                                                                          | 8,9               |
| 3  |                                                           |     |                                                                                                                                                                                                                                                                                                                                                                                |                   |
| 4  | Objectives                                                | 7   | Specific objectives or hypotheses                                                                                                                                                                                                                                                                                                                                              | 7,8               |
| 5  |                                                           |     |                                                                                                                                                                                                                                                                                                                                                                                |                   |
| 6  | Trial design                                              | 8   | Description of trial design including type of trial (eg, parallel group, crossover, factorial, single group), allocation ratio, and framework (eg, superiority, equivalence, noninferiority, exploratory)                                                                                                                                                                      | 8,9               |
| 7  |                                                           |     |                                                                                                                                                                                                                                                                                                                                                                                |                   |
| 8  |                                                           |     |                                                                                                                                                                                                                                                                                                                                                                                |                   |
| 9  |                                                           |     |                                                                                                                                                                                                                                                                                                                                                                                |                   |
| 10 |                                                           |     |                                                                                                                                                                                                                                                                                                                                                                                |                   |
| 11 |                                                           |     |                                                                                                                                                                                                                                                                                                                                                                                |                   |
| 12 | <b>Methods: Participants, interventions, and outcomes</b> |     |                                                                                                                                                                                                                                                                                                                                                                                |                   |
| 13 |                                                           |     |                                                                                                                                                                                                                                                                                                                                                                                |                   |
| 14 | Study setting                                             | 9   | Description of study settings (eg, community clinic, academic hospital) and list of countries where data will be collected. Reference to where list of study sites can be obtained                                                                                                                                                                                             | 9                 |
| 15 |                                                           |     |                                                                                                                                                                                                                                                                                                                                                                                |                   |
| 16 |                                                           |     |                                                                                                                                                                                                                                                                                                                                                                                |                   |
| 17 |                                                           |     |                                                                                                                                                                                                                                                                                                                                                                                |                   |
| 18 |                                                           |     |                                                                                                                                                                                                                                                                                                                                                                                |                   |
| 19 | Eligibility criteria                                      | 10  | Inclusion and exclusion criteria for participants. If applicable, eligibility criteria for study centres and individuals who will perform the interventions (eg, surgeons, psychotherapists)                                                                                                                                                                                   | 9,10              |
| 20 |                                                           |     |                                                                                                                                                                                                                                                                                                                                                                                |                   |
| 21 |                                                           |     |                                                                                                                                                                                                                                                                                                                                                                                |                   |
| 22 |                                                           |     |                                                                                                                                                                                                                                                                                                                                                                                |                   |
| 23 |                                                           |     |                                                                                                                                                                                                                                                                                                                                                                                |                   |
| 24 |                                                           |     |                                                                                                                                                                                                                                                                                                                                                                                |                   |
| 25 | Interventions                                             | 11a | Interventions for each group with sufficient detail to allow replication, including how and when they will be administered                                                                                                                                                                                                                                                     | 10,11             |
| 26 |                                                           |     |                                                                                                                                                                                                                                                                                                                                                                                |                   |
| 27 |                                                           |     |                                                                                                                                                                                                                                                                                                                                                                                |                   |
| 28 |                                                           |     |                                                                                                                                                                                                                                                                                                                                                                                |                   |
| 29 |                                                           |     |                                                                                                                                                                                                                                                                                                                                                                                |                   |
| 30 |                                                           | 11b | Criteria for discontinuing or modifying allocated interventions for a given trial participant (eg, drug dose change in response to harms, participant request, or improving/worsening disease)                                                                                                                                                                                 | 10,11             |
| 31 |                                                           |     |                                                                                                                                                                                                                                                                                                                                                                                |                   |
| 32 |                                                           |     |                                                                                                                                                                                                                                                                                                                                                                                |                   |
| 33 |                                                           |     |                                                                                                                                                                                                                                                                                                                                                                                |                   |
| 34 |                                                           |     |                                                                                                                                                                                                                                                                                                                                                                                |                   |
| 35 |                                                           | 11c | Strategies to improve adherence to intervention protocols, and any procedures for monitoring adherence (eg, drug tablet return, laboratory tests)                                                                                                                                                                                                                              | 12                |
| 36 |                                                           |     |                                                                                                                                                                                                                                                                                                                                                                                |                   |
| 37 |                                                           |     |                                                                                                                                                                                                                                                                                                                                                                                |                   |
| 38 |                                                           |     |                                                                                                                                                                                                                                                                                                                                                                                |                   |
| 39 |                                                           |     |                                                                                                                                                                                                                                                                                                                                                                                |                   |
| 40 |                                                           | 11d | Relevant concomitant care and interventions that are permitted or prohibited during the trial                                                                                                                                                                                                                                                                                  | 12                |
| 41 |                                                           |     |                                                                                                                                                                                                                                                                                                                                                                                |                   |
| 42 |                                                           |     |                                                                                                                                                                                                                                                                                                                                                                                |                   |
| 43 | Outcomes                                                  | 12  | Primary, secondary, and other outcomes, including the specific measurement variable (eg, systolic blood pressure), analysis metric (eg, change from baseline, final value, time to event), method of aggregation (eg, median, proportion), and time point for each outcome. Explanation of the clinical relevance of chosen efficacy and harm outcomes is strongly recommended | 7,8               |
| 44 |                                                           |     |                                                                                                                                                                                                                                                                                                                                                                                |                   |
| 45 |                                                           |     |                                                                                                                                                                                                                                                                                                                                                                                |                   |
| 46 |                                                           |     |                                                                                                                                                                                                                                                                                                                                                                                |                   |
| 47 |                                                           |     |                                                                                                                                                                                                                                                                                                                                                                                |                   |
| 48 |                                                           |     |                                                                                                                                                                                                                                                                                                                                                                                |                   |
| 49 |                                                           |     |                                                                                                                                                                                                                                                                                                                                                                                |                   |
| 50 |                                                           |     |                                                                                                                                                                                                                                                                                                                                                                                |                   |
| 51 |                                                           |     |                                                                                                                                                                                                                                                                                                                                                                                |                   |
| 52 | Participant timeline                                      | 13  | Time schedule of enrolment, interventions (including any run-ins and washouts), assessments, and visits for participants. A schematic diagram is highly recommended (see Figure)                                                                                                                                                                                               | Figure 1, table 1 |
| 53 |                                                           |     |                                                                                                                                                                                                                                                                                                                                                                                |                   |
| 54 |                                                           |     |                                                                                                                                                                                                                                                                                                                                                                                |                   |
| 55 |                                                           |     |                                                                                                                                                                                                                                                                                                                                                                                |                   |
| 56 |                                                           |     |                                                                                                                                                                                                                                                                                                                                                                                |                   |
| 57 |                                                           |     |                                                                                                                                                                                                                                                                                                                                                                                |                   |
| 58 |                                                           |     |                                                                                                                                                                                                                                                                                                                                                                                |                   |
| 59 |                                                           |     |                                                                                                                                                                                                                                                                                                                                                                                |                   |
| 60 |                                                           |     |                                                                                                                                                                                                                                                                                                                                                                                |                   |

|   |             |    |                                                         |   |
|---|-------------|----|---------------------------------------------------------|---|
| 1 |             |    |                                                         |   |
| 2 | Sample size | 14 | Estimated number of participants needed to achieve      | 9 |
| 3 |             |    | study objectives and how it was determined, including   |   |
| 4 |             |    | clinical and statistical assumptions supporting any     |   |
| 5 |             |    | sample size calculations                                |   |
| 6 |             |    |                                                         |   |
| 7 | Recruitment | 15 | Strategies for achieving adequate participant enrolment | 9 |
| 8 |             |    | to reach target sample size                             |   |
| 9 |             |    |                                                         |   |

### Methods: Assignment of interventions (for controlled trials)

#### Allocation:

|    |                |     |                                                            |    |
|----|----------------|-----|------------------------------------------------------------|----|
| 14 | Sequence       | 16a | Method of generating the allocation sequence (eg,          | NA |
| 15 | generation     |     | computer-generated random numbers), and list of any        |    |
| 16 |                |     | factors for stratification. To reduce predictability of a  |    |
| 17 |                |     | random sequence, details of any planned restriction (eg,   |    |
| 18 |                |     | blocking) should be provided in a separate document that   |    |
| 19 |                |     | is unavailable to those who enrol participants or assign   |    |
| 20 |                |     | interventions                                              |    |
| 21 |                |     |                                                            |    |
| 22 |                |     |                                                            |    |
| 23 |                |     |                                                            |    |
| 24 | Allocation     | 16b | Mechanism of implementing the allocation sequence (eg,     | NA |
| 25 | concealment    |     | central telephone; sequentially numbered, opaque,          |    |
| 26 | mechanism      |     | sealed envelopes), describing any steps to conceal the     |    |
| 27 |                |     | sequence until interventions are assigned                  |    |
| 28 |                |     |                                                            |    |
| 29 |                |     |                                                            |    |
| 30 | Implementation | 16c | Who will generate the allocation sequence, who will enrol  | NA |
| 31 |                |     | participants, and who will assign participants to          |    |
| 32 |                |     | interventions                                              |    |
| 33 |                |     |                                                            |    |
| 34 | Blinding       | 17a | Who will be blinded after assignment to interventions (eg, | NA |
| 35 | (masking)      |     | trial participants, care providers, outcome assessors,     |    |
| 36 |                |     | data analysts), and how                                    |    |
| 37 |                |     |                                                            |    |
| 38 |                |     |                                                            |    |
| 39 |                | 17b | If blinded, circumstances under which unblinding is        | NA |
| 40 |                |     | permissible, and procedure for revealing a participant's   |    |
| 41 |                |     | allocated intervention during the trial                    |    |
| 42 |                |     |                                                            |    |

### Methods: Data collection, management, and analysis

|    |                 |     |                                                             |       |
|----|-----------------|-----|-------------------------------------------------------------|-------|
| 45 | Data collection | 18a | Plans for assessment and collection of outcome,             | 12,13 |
| 46 | methods         |     | baseline, and other trial data, including any related       |       |
| 47 |                 |     | processes to promote data quality (eg, duplicate            |       |
| 48 |                 |     | measurements, training of assessors) and a description      |       |
| 49 |                 |     | of study instruments (eg, questionnaires, laboratory        |       |
| 50 |                 |     | tests) along with their reliability and validity, if known. |       |
| 51 |                 |     | Reference to where data collection forms can be found, if   |       |
| 52 |                 |     | not in the protocol                                         |       |
| 53 |                 |     |                                                             |       |
| 54 |                 |     |                                                             |       |
| 55 |                 |     |                                                             |       |
| 56 |                 | 18b | Plans to promote participant retention and complete         | 13    |
| 57 |                 |     | follow-up, including list of any outcome data to be         |       |
| 58 |                 |     | collected for participants who discontinue or deviate from  |       |
| 59 |                 |     | intervention protocols                                      |       |
| 60 |                 |     |                                                             |       |

|    |                                 |     |                                                             |       |
|----|---------------------------------|-----|-------------------------------------------------------------|-------|
| 1  |                                 |     |                                                             |       |
| 2  | Data                            | 19  | Plans for data entry, coding, security, and storage,        | NA    |
| 3  | management                      |     | including any related processes to promote data quality     |       |
| 4  |                                 |     | (eg, double data entry; range checks for data values).      |       |
| 5  |                                 |     | Reference to where details of data management               |       |
| 6  |                                 |     | procedures can be found, if not in the protocol             |       |
| 7  |                                 |     |                                                             |       |
| 8  |                                 |     |                                                             |       |
| 9  | Statistical                     | 20a | Statistical methods for analysing primary and secondary     | 13    |
| 10 | methods                         |     | outcomes. Reference to where other details of the           |       |
| 11 |                                 |     | statistical analysis plan can be found, if not in the       |       |
| 12 |                                 |     | protocol                                                    |       |
| 13 |                                 |     |                                                             |       |
| 14 |                                 | 20b | Methods for any additional analyses (eg, subgroup and       | 13    |
| 15 |                                 |     | adjusted analyses)                                          |       |
| 16 |                                 |     |                                                             |       |
| 17 |                                 | 20c | Definition of analysis population relating to protocol non- | NA    |
| 18 |                                 |     | adherence (eg, as randomised analysis), and any             |       |
| 19 |                                 |     | statistical methods to handle missing data (eg, multiple    |       |
| 20 |                                 |     | imputation)                                                 |       |
| 21 |                                 |     |                                                             |       |
| 22 |                                 |     |                                                             |       |
| 23 | <b>Methods: Monitoring</b>      |     |                                                             |       |
| 24 |                                 |     |                                                             |       |
| 25 | Data monitoring                 | 21a | Composition of data monitoring committee (DMC);             | 12    |
| 26 |                                 |     | summary of its role and reporting structure; statement of   |       |
| 27 |                                 |     | whether it is independent from the sponsor and              |       |
| 28 |                                 |     | competing interests; and reference to where further         |       |
| 29 |                                 |     | details about its charter can be found, if not in the       |       |
| 30 |                                 |     | protocol. Alternatively, an explanation of why a DMC is     |       |
| 31 |                                 |     | not needed                                                  |       |
| 32 |                                 |     |                                                             |       |
| 33 |                                 | 21b | Description of any interim analyses and stopping            | 12    |
| 34 |                                 |     | guidelines, including who will have access to these         |       |
| 35 |                                 |     | interim results and make the final decision to terminate    |       |
| 36 |                                 |     | the trial                                                   |       |
| 37 |                                 |     |                                                             |       |
| 38 |                                 |     |                                                             |       |
| 39 |                                 |     |                                                             |       |
| 40 | Harms                           | 22  | Plans for collecting, assessing, reporting, and managing    | 11,12 |
| 41 |                                 |     | solicited and spontaneously reported adverse events and     |       |
| 42 |                                 |     | other unintended effects of trial interventions or trial    |       |
| 43 |                                 |     | conduct                                                     |       |
| 44 |                                 |     |                                                             |       |
| 45 |                                 |     |                                                             |       |
| 46 | Auditing                        | 23  | Frequency and procedures for auditing trial conduct, if     | 9     |
| 47 |                                 |     | any, and whether the process will be independent from       |       |
| 48 |                                 |     | investigators and the sponsor                               |       |
| 49 |                                 |     |                                                             |       |
| 50 |                                 |     |                                                             |       |
| 51 | <b>Ethics and dissemination</b> |     |                                                             |       |
| 52 |                                 |     |                                                             |       |
| 53 | Research ethics                 | 24  | Plans for seeking research ethics committee/institutional   |       |
| 54 | approval                        |     | review board (REC/IRB) approval                             |       |
| 55 |                                 |     |                                                             |       |
| 56 |                                 |     |                                                             |       |
| 57 |                                 |     |                                                             |       |
| 58 |                                 |     |                                                             |       |
| 59 |                                 |     |                                                             |       |
| 60 |                                 |     |                                                             |       |

|    |                   |     |                                                                |            |
|----|-------------------|-----|----------------------------------------------------------------|------------|
| 1  |                   |     |                                                                |            |
| 2  | Protocol          | 25  | Plans for communicating important protocol modifications       | 14         |
| 3  | amendments        |     | (eg, changes to eligibility criteria, outcomes, analyses) to   |            |
| 4  |                   |     | relevant parties (eg, investigators, REC/IRBs, trial           |            |
| 5  |                   |     | participants, trial registries, journals, regulators)          |            |
| 6  |                   |     |                                                                |            |
| 7  | Consent or assent | 26a | Who will obtain informed consent or assent from potential      | 9          |
| 8  |                   |     | trial participants or authorised surrogates, and how (see      |            |
| 9  |                   |     | Item 32)                                                       |            |
| 10 |                   |     |                                                                |            |
| 11 |                   | 26b | Additional consent provisions for collection and use of        | 9, table 1 |
| 12 |                   |     | participant data and biological specimens in ancillary         |            |
| 13 |                   |     | studies, if applicable                                         |            |
| 14 |                   |     |                                                                |            |
| 15 |                   |     |                                                                |            |
| 16 | Confidentiality   | 27  | How personal information about potential and enrolled          | 14         |
| 17 |                   |     | participants will be collected, shared, and maintained in      |            |
| 18 |                   |     | order to protect confidentiality before, during, and after     |            |
| 19 |                   |     | the trial                                                      |            |
| 20 |                   |     |                                                                |            |
| 21 |                   |     |                                                                |            |
| 22 | Declaration of    | 28  | Financial and other competing interests for principal          | 16,17      |
| 23 | interests         |     | investigators for the overall trial and each study site        |            |
| 24 |                   |     |                                                                |            |
| 25 | Access to data    | 29  | Statement of who will have access to the final trial           | 17         |
| 26 |                   |     | dataset, and disclosure of contractual agreements that         |            |
| 27 |                   |     | limit such access for investigators                            |            |
| 28 |                   |     |                                                                |            |
| 29 |                   |     |                                                                |            |
| 30 | Ancillary and     | 30  | Provisions, if any, for ancillary and post-trial care, and for | 11,12      |
| 31 | post-trial care   |     | compensation to those who suffer harm from trial               |            |
| 32 |                   |     | participation                                                  |            |
| 33 |                   |     |                                                                |            |
| 34 | Dissemination     | 31a | Plans for investigators and sponsor to communicate trial       | 14         |
| 35 | policy            |     | results to participants, healthcare professionals, the         |            |
| 36 |                   |     | public, and other relevant groups (eg, via publication,        |            |
| 37 |                   |     | reporting in results databases, or other data sharing          |            |
| 38 |                   |     | arrangements), including any publication restrictions          |            |
| 39 |                   |     |                                                                |            |
| 40 |                   |     |                                                                |            |
| 41 |                   | 31b | Authorship eligibility guidelines and any intended use of      | NA         |
| 42 |                   |     | professional writers                                           |            |
| 43 |                   |     |                                                                |            |
| 44 |                   | 31c | Plans, if any, for granting public access to the full          | 14         |
| 45 |                   |     | protocol, participant-level dataset, and statistical code      |            |
| 46 |                   |     |                                                                |            |
| 47 |                   |     |                                                                |            |
| 48 | <b>Appendices</b> |     |                                                                |            |
| 49 |                   |     |                                                                |            |
| 50 | Informed consent  | 32  | Model consent form and other related documentation             | NA         |
| 51 | materials         |     | given to participants and authorised surrogates                |            |
| 52 |                   |     |                                                                |            |
| 53 | Biological        | 33  | Plans for collection, laboratory evaluation, and storage of    | NA         |
| 54 | specimens         |     | biological specimens for genetic or molecular analysis in      |            |
| 55 |                   |     | the current trial and for future use in ancillary studies, if  |            |
| 56 |                   |     | applicable                                                     |            |
| 57 |                   |     |                                                                |            |

\*It is strongly recommended that this checklist be read in conjunction with the SPIRIT 2013 Explanation & Elaboration for important clarification on the items. Amendments to the



1  
2  
3  
4  
5  
6  
7  
8  
9  
10  
11  
12  
13  
14  
15  
16  
17  
18  
19  
20  
21  
22  
23  
24  
25  
26  
27  
28  
29  
30  
31  
32  
33  
34  
35  
36  
37  
38  
39  
40  
41  
42  
43  
44  
45  
46  
47  
48  
49  
50  
51  
52  
53  
54  
55  
56  
57  
58  
59  
60

protocol should be tracked and dated. The SPIRIT checklist is copyrighted by the SPIRIT Group under the Creative Commons "[Attribution-NonCommercial-NoDerivs 3.0 Unported](#)" license.

For peer review only

# BMJ Open

## Camu Camu effects on microbial translocation and systemic immune activation in ART-treated people living with HIV: protocol of the single-arm non-randomised Camu Camu prebiotic pilot study (CIHR/CTN PT032)

|                                 |                                                                                                                                                                                                                                                                                                                                                                                                                                                                                                                                                                                                                                                                                                                                                                                                                                                                                                                                                                                                                                                                                                                                                                                                                                                                                                                                                                                                                                                                                                                                                                                                                                                                                                                                                                                                                                         |
|---------------------------------|-----------------------------------------------------------------------------------------------------------------------------------------------------------------------------------------------------------------------------------------------------------------------------------------------------------------------------------------------------------------------------------------------------------------------------------------------------------------------------------------------------------------------------------------------------------------------------------------------------------------------------------------------------------------------------------------------------------------------------------------------------------------------------------------------------------------------------------------------------------------------------------------------------------------------------------------------------------------------------------------------------------------------------------------------------------------------------------------------------------------------------------------------------------------------------------------------------------------------------------------------------------------------------------------------------------------------------------------------------------------------------------------------------------------------------------------------------------------------------------------------------------------------------------------------------------------------------------------------------------------------------------------------------------------------------------------------------------------------------------------------------------------------------------------------------------------------------------------|
| Journal:                        | <i>BMJ Open</i>                                                                                                                                                                                                                                                                                                                                                                                                                                                                                                                                                                                                                                                                                                                                                                                                                                                                                                                                                                                                                                                                                                                                                                                                                                                                                                                                                                                                                                                                                                                                                                                                                                                                                                                                                                                                                         |
| Manuscript ID                   | bmjopen-2021-053081.R1                                                                                                                                                                                                                                                                                                                                                                                                                                                                                                                                                                                                                                                                                                                                                                                                                                                                                                                                                                                                                                                                                                                                                                                                                                                                                                                                                                                                                                                                                                                                                                                                                                                                                                                                                                                                                  |
| Article Type:                   | Protocol                                                                                                                                                                                                                                                                                                                                                                                                                                                                                                                                                                                                                                                                                                                                                                                                                                                                                                                                                                                                                                                                                                                                                                                                                                                                                                                                                                                                                                                                                                                                                                                                                                                                                                                                                                                                                                |
| Date Submitted by the Author:   | 15-Nov-2021                                                                                                                                                                                                                                                                                                                                                                                                                                                                                                                                                                                                                                                                                                                                                                                                                                                                                                                                                                                                                                                                                                                                                                                                                                                                                                                                                                                                                                                                                                                                                                                                                                                                                                                                                                                                                             |
| Complete List of Authors:       | Isnard, Stéphane; Research Institute of the McGill University Health Centre; McGill University Health Centre, Department of Medicine Fombuena, Brandon; Research Institute of the McGill University Health Centre; McGill University Health Centre, Department of Medicine Ouyang, Jing; Research Institute of the McGill University Health Centre; McGill University Health Centre, Department of Medicine Royston, Léna; Research Institute of the McGill University Health Centre; McGill University Health Centre, Department of Medicine Lin, John; Research Institute of the McGill University Health Centre; McGill University Health Centre, Department of Medicine Bu, Simeng; Research Institute of the McGill University Health Centre; McGill University Health Centre, Department of Medicine Sheehan, Nancy; McGill University Health Centre, Department of Medicine Lakatos, Péter; McGill University Bessissow, Talat; McGill University Chomont, Nicolas; Centre de recherche du centre hospitalier de l'université de Montréal, Centre de Recherche du CHUM and Department of microbiology, infectiology and immunology, Université de Montréal Klein, Marina; Research Institute of the McGill University Health Centre Lebouché, Bertrand; McGill University Health Centre, Chronic Viral Illness Service, McGill University Health Centre; McGill University, Department of Family Medicine, McGill University Costiniuk, Cecilia T.; McGill University, Chronic Viral Illness Service Routy, Bertrand; Centre Hospitalier de l'Université de Montréal Centre de Recherche Marette, André; McGill University Health Centre, Department of Family Medicine; Laval University Routy, Jean-Pierre; Research Institute of the McGill University Health Centre; McGill University Health Centre, Department of Medicine |
| <b>Primary Subject Heading</b>: | HIV/AIDS                                                                                                                                                                                                                                                                                                                                                                                                                                                                                                                                                                                                                                                                                                                                                                                                                                                                                                                                                                                                                                                                                                                                                                                                                                                                                                                                                                                                                                                                                                                                                                                                                                                                                                                                                                                                                                |
| Secondary Subject Heading:      | Gastroenterology and hepatology, Immunology (including allergy), Infectious diseases, Nutrition and metabolism                                                                                                                                                                                                                                                                                                                                                                                                                                                                                                                                                                                                                                                                                                                                                                                                                                                                                                                                                                                                                                                                                                                                                                                                                                                                                                                                                                                                                                                                                                                                                                                                                                                                                                                          |
| Keywords:                       | HIV & AIDS < INFECTIOUS DISEASES, Inflammatory bowel disease <                                                                                                                                                                                                                                                                                                                                                                                                                                                                                                                                                                                                                                                                                                                                                                                                                                                                                                                                                                                                                                                                                                                                                                                                                                                                                                                                                                                                                                                                                                                                                                                                                                                                                                                                                                          |

1  
2  
3  
4  
5  
6  
7  
8  
9  
10  
11  
12  
13  
14  
15  
16  
17  
18  
19  
20  
21  
22  
23  
24  
25  
26  
27  
28  
29  
30  
31  
32  
33  
34  
35  
36  
37  
38  
39  
40  
41  
42  
43  
44  
45  
46  
47  
48  
49  
50  
51  
52  
53  
54  
55  
56  
57  
58  
59  
60

|  |                                                                      |
|--|----------------------------------------------------------------------|
|  | GASTROENTEROLOGY, Nutritional support < GASTROENTEROLOGY, IMMUNOLOGY |
|  |                                                                      |

SCHOLARONE™  
Manuscripts

1  
2  
3 **Camu Camu effects on microbial translocation and systemic immune activation in ART-**  
4 **treated people living with HIV: protocol of the single-arm non-randomised Camu Camu**  
5 **prebiotic pilot study (CIHR/CTN PT032)**  
6

7  
8 Stéphane Isnard<sup>1,2,3</sup>, Brandon Fombuena<sup>1,2</sup>, Jing Ouyang<sup>1,2,4</sup>, Léna Royston<sup>1,2</sup>, John Lin<sup>1,2</sup>, Simeng  
9 Bu<sup>1,2</sup>, Nancy Sheehan<sup>2</sup>, Peter L. Lakatos<sup>5</sup>, Talat Bessissow<sup>5</sup>, Nicolas Chomont<sup>6</sup>, Marina B.  
10 Klein<sup>1,2</sup>, Bertrand Lebouché<sup>1,2,7,8</sup>, Cecilia T Costiniuk<sup>1,2</sup>, Bertrand Routy<sup>6</sup>, André Marette<sup>8,9</sup>, Jean  
11 Pierre Routy<sup>1,2,11\*</sup>, For the Camu Camu Study Group  
12  
13

14  
15 <sup>1</sup> Infectious Diseases and Immunity in Global Health Program, Research Institute, McGill  
16 University Health Centre, Montréal, QC, Canada,

17 <sup>2</sup> Department of Medicine, Division of Infectious diseases and Chronic Viral Illness Service,  
18 McGill University Health Centre, Montréal, QC, Canada,

19 <sup>3</sup> CIHR Canadian HIV Trials Network, Vancouver, BC, Canada

20 <sup>4</sup> Chongqing Public Health Medical Center, Chongqing, China,

21 <sup>5</sup> Division of Gastroenterology, McGill University Health Center, Montréal, QC, Canada

22 <sup>6</sup> Centre de Recherche du Centre Hospitalier de l'Université de Montréal, Montréal, QC, Canada

23 <sup>7</sup> Centre for Outcomes Research and Evaluation, Research Institute of the McGill University  
24 Health Centre, Montréal, QC, Canada

25 <sup>8</sup> Department of Family Medicine, McGill University Health Centre, Montréal, QC, Canada

26 <sup>8</sup> Institute of Nutrition and Functional Foods, Laval University, Québec City, QC, Canada

27 <sup>9</sup> Department of Medicine, Faculty of Medicine, Cardiology Axis of the Québec Heart and Lung  
28 Institute, Laval University, Québec City, QC, Canada

29 <sup>11</sup> Division of Hematology, McGill University Health Centre, Montréal, QC, Canada  
30  
31  
32  
33  
34  
35  
36  
37

38 **Correspondence:**

39 **Jean-pierre.routy@mcgill.ca**  
40  
41  
42  
43  
44  
45  
46  
47  
48  
49  
50  
51  
52  
53  
54  
55  
56  
57  
58  
59  
60

## **ABSTRACT (249 words)**

### **Introduction**

Despite the success of antiretroviral therapy (ART) in transforming HIV disease into a chronic infection, people living with HIV (PLWH) remain at risk for various non-AIDS inflammatory comorbidities. Risk of non-AIDS comorbidities is associated with gut dysbiosis, epithelial gut damage and subsequent microbial translocation, and increased activation of both circulating CD4+ and CD8+ T-cells. Therefore, in addition to ART, novel gut microbiota-modulating therapies could aid in reducing inflammation and immune activation, gut damage, and microbial translocation. Amongst various gut-modulation strategies under investigation, the Amazonian fruit Camu Camu (CC) presents itself as a prebiotic candidate based on its anti-inflammatory and antioxidant properties in animal models and tobacco smokers.

### **Method and analysis**

A total of 22 PLWH on ART for more than 2 years, with a viral load <50 copies/mL, a CD4+ count >200 and a CD4+/CD8+ ratio <1 (suggesting increased inflammation and risk for non-AIDS comorbidities), will be recruited in a single arm, non-randomized, interventional pilot trial. We will assess tolerance and effect of supplementation with CC in ART-treated PLWH on reducing gut damage, microbial translocation, inflammation, and HIV latent reservoir by various assays.

### **Ethics and dissemination**

The Canadian Institutes of Health Research (CIHR)/Canadian HIV Trials Network (CTN) pilot trial protocol CTNPT032 was approved by the Natural and Non-prescription Health Products Directorate of Health Canada and the research ethics board of the McGill university Health Centre committee (number 2020-5903). Results will be made available as a free access through publications in peer reviewed journals and through the CIHR/CTN website.

### **Trial registration number**

ClinicalTrials.gov: NCT04058392

## KEYWORDS

Camu Camu; HIV; Antiretroviral therapy; Prebiotic; Gut microbiota; gut mucosa; Inflammation.

## ARTICLE SUMMARY: STRENGTHS AND LIMITATIONS OF THIS STUDY

- Camu camu (CC) is an Amazonian rainforest fruit which has been shown to have anti-inflammatory and gut microbiota-modulating properties in mice.
- The Camu Camu study seeks to confirm mouse model findings on systemic inflammation and immune activation, gut dysbiosis and damage, and subsequent microbial translocation in antiretroviral therapy (ART)-treated people living with HIV (PLWH).
- We hypothesize that treatment with CC will beneficially impact ART-treated PLWH by improving their gut microbiota composition, reducing microbial translocation, reducing inflammation to potentially decreasing latent HIV reservoir size and the risk to develop non-AIDS comorbidities.
- Changes induced by CC treatment will be assessed by plasma markers of gut damage, microbial translocation, inflammation, percentage of activated T-cells, HIV reservoir size and gut bacterial taxa.
- This pilot trial with 22 ART-treated PLWH, will provide sufficient data for future sample size calculations to confirm the effect of CC in more definitive larger studies.

**Main text (3941 words)****INTRODUCTION****Antiretroviral therapy inhibits viral replication without eradication.**

Antiretroviral therapy (ART) successfully controls Human Immunodeficiency Virus (HIV) infection by inhibiting viral replication and has significantly improved the life expectancy of people living with HIV (PLWH) while eliminating transmission to others. However, ART-treated PLWH remain at risk for developing inflammatory non-AIDS comorbidities such as cardiovascular diseases, fatty liver, neurocognition dysfunction and cancer (1, 2). These non-AIDS comorbidities are associated with persistent immune activation and increase with aging, co-infections like cytomegalovirus (CMV) and viral hepatitis as well as microbial translocation. It has been observed in HIV infection and inflammatory bowel disease that abnormal composition of the gut microbiota called “dysbiosis”, alteration of the gut barrier, T-helper (Th) 17 cell dysfunction and microbial translocation lead to systemic inflammation and immune activation contributing to non-AIDS comorbidities (3-9). Long-term HIV control by ART appears to only partially reduce inflammation and poorly replenishes Th17 protective mucosal function, highlighting the importance of research on gut microbiota and the epithelial barrier. Furthermore, despite control of HIV replication, persistent HIV infection in long-lived memory CD4+ T-cells and likely macrophages also contribute to inflammation and microbial translocation, creating a vicious cycle nurturing inflammation. Importantly, the size of the HIV reservoir has been linked to the level of inflammation and immune activation measured in CD8+ T-cells and macrophages (3, 10). Conversely, it remains unknown whether the reduction of inflammation can lead to a decrease in the size of the HIV reservoir.

**Gut damage and immune activation**

As HIV is not cleared with ART, persistent viral products and inflammation subsequently impair antigen-specific T-cell responses. This overall activation leads to the exhaustion of the immune system, including T-cells. This distinctive feature from other chronic viral infections is relevant as HIV replicates preferentially in Th17 CD4+ T-cells residing in the gut, leading to cell death and mucosa damage (11-13). Microbial products penetrate the damaged gut barrier and pass into the systemic circulation. Such microbial translocation contributes to systemic immune activation,

1  
2  
3 disease progression, and development of non-AIDS comorbidities (14-17). Markers of bacterial  
4 translocation, including lipopolysaccharide (LPS), LPS binding protein (LBP), and soluble CD14  
5 (sCD14) have been correlated with immune activation and disease progression (3, 11, 18, 19).  
6  
7 While bacterial translocation is thought to be a major cause of immune activation, we have shown  
8 that circulating beta-D-glucan (BDG), a marker of fungal translocation, also contributes to the  
9 immune activation in an LPS-independent manner (20, 21).

10  
11  
12  
13 Although ART suppresses HIV replication to undetectable levels, microbial translocation  
14 and Th17 damage remain, contributing to persistent immune activation. Local gut inflammation  
15 has been associated with HIV reservoir size (22). Monocytes/macrophages, Dendritic cells, and  
16 Natural Killer (NK) cells detect microbial products in the mesenteric lymph nodes and in systemic  
17 circulation, secreting pro-inflammatory cytokines (interleukin (IL)-1 $\beta$ , IL-8, tumor necrosis factor  
18 (TNF)- $\alpha$ ). These cytokines drive CD4+ T-cell activation, leading to elevated expression of the  
19 HIV co-receptor C-C Chemokine receptor (CCR) 5 and the gut homing receptor CCR6 (23). Th17  
20 measured by CD4+ T-cells expressing CCR6 have then been shown by our group to be  
21 preferentially infected by HIV (12, 13, 24).

### 30 31 **Gut microbiota, dysbiosis and immune regulation**

32 The gut microbiota composition and metabolites play an important role in inflammation in obesity,  
33 diabetes, cancer, and HIV infection. Its role includes food and metabolite processing, microbial  
34 regulation, and immune regulation (25-28). PLWH, compared to uninfected controls, present with  
35 a dysbiosis characterized by a lower abundance of Firmicutes and more abundant Proteobacteria  
36 in their gut microbiota. In addition lack of *Lactobacilli* in stools is associated with lower CD4+ T-  
37 cell count and a higher levels of systemic immune activation (29). Moreover, lower levels of  
38 *Akkermansia muciniphila* have been observed in PLWH. Dysbiosis combined with microbial  
39 translocation has been linked to non-AIDS comorbidities in HIV-infected individuals and  
40 influences CD4+ T-cell recovery on ART as reported by our group and others (3, 14, 18, 30, 31).

### 48 49 50 ***Akkermansia muciniphila* in health and disease**

51 *Akkermansia muciniphila* (*A. muciniphila*) is a gram-negative, strict anaerobe and mucin-  
52 degrading bacterium that colonizes the gut of humans and rodents. *A. muciniphila* represents 1-  
53 5% of all intestinal bacteria. This bacterium acts as a shield on the gut epithelial barrier and has  
54  
55  
56  
57  
58  
59  
60



1  
2  
3 been shown to reduce insulin resistance in obese individuals (26, 32-36). Lower abundance of *A.*  
4 *muciniphila* has been found in the feces of patients with inflammatory bowel disease (IBD) and  
5 individuals with obesity, when compared to feces of healthy individuals (25, 26). Furthermore,  
6 oral administration of *A. muciniphila* to mice fed a high-fat diet alleviates obesity, reduces LPS in  
7 the circulation and alleviates insulin resistance (26, 37, 38).  
8  
9

10  
11 Additionally, patients with lung and renal cell carcinoma responding to anti-PD-1  
12 treatment were more prone to have an elevated abundance of gut *A. muciniphila* compared to non-  
13 responders (28). To go beyond association, B. Routy *et al.* transferred the microbiota from  
14 responders and non-responders into germ-free mice and observed a tumor response only in mice  
15 with a *A. muciniphila* rich human fecal microbiota from the responders (28). Both *in vitro* and *in*  
16 *vivo*, *A. muciniphila* has been shown to increase mucus secretion by goblet cells and gut epithelium  
17 integrity contributing to the prevention of other bacterial products from passing into the circulation  
18 (35, 38, 39). Moreover, oral administration *A. muciniphila* was shown to successfully elevate key  
19 anti-aging and anticancer metabolites primarily in the gut and liver (40).  
20  
21

22  
23 Based on these encouraging results, different attempts have been made to increase *A.*  
24 *muciniphila* in the gut. Everard *et al.* showed that pasteurized *A. muciniphila* increased mucus  
25 thickness, decreased LPS translocation, and reduced metabolic syndrome in obese mice. In  
26 contrast, heat-killed *A. muciniphila* did not protect mice from obesity (38). However, such  
27 pasteurized strains are costly, difficult to produce and may not last after oral administration.  
28  
29

### 30 31 32 33 34 35 36 37 38 **The Amazonian fruit Camu Camu**

39 Camu Camu (CC), also named *Myriciaria dubia*, is an Amazon rainforest fruit with antioxidant  
40 and anti-inflammatory properties. Anhê *et al.* showed that polyphenol-rich cranberry and CC  
41 extracts protect mice from diet-induced obesity and intestinal inflammation in association with  
42 increased *A. muciniphila* in the gut microbiota (32-35). CC was more efficient at reducing the  
43 amount of LPS in plasma than cranberry extract in the diet-induced model of obesity, and it was  
44 also found to increase other beneficial microbes in addition to *A. muciniphila*. Other studies have  
45 shown that polyphenols could favor *A. muciniphila* in the gut (26, 41, 42). Importantly, CC extracts  
46 also decreased C-Reactive protein (CRP), IL-6 and IL-8 in the plasma of healthy tobacco smokers  
47 (43). CC is considered a “super fruit” which is widely available in many Canadian health food  
48  
49  
50  
51  
52  
53  
54  
55  
56  
57  
58  
59  
60

1  
2  
3 stores in either powder or capsule form. CC products have been used as a nutritional supplement  
4 that is well tolerated in humans (44).  
5

6 CC is a fruit rich in polyphenols and has been shown in mouse model of inflammation-  
7 related diseases to reduce inflammation and improve gut microbiota with increased *A. muciniphila*  
8 and other beneficial bacteria (32-35). However, no studies have been performed to test CC in  
9 PLWH. Moreover, PLWH on ART have been shown to exhibit persistent dysbiosis, an altered gut  
10 microbiota composition, along with microbial translocation which can cause non-AIDS  
11 comorbidities and hamper CD4+ T-cell recovery (3, 14, 18, 30). Therefore, we will evaluate if the  
12 polyphenol rich CC can positively affect PLWH on ART in terms of reducing inflammation,  
13 improving gut microbiota and potentially decreasing HIV persistent reservoir.  
14  
15  
16  
17  
18  
19  
20  
21

## 22 **Objective**

23 To determine the feasibility and suitable design of a full-scale study on the effect of Camu Camu  
24 in ART-treated PLWH, we designed a non-randomized, single arm, interventional study.  
25  
26  
27  
28

## 29 **Primary outcomes**

30 The primary outcome of this study will be to evaluate the effect of CC on the reduction of the  
31 plasma marker of microbial translocation LPS, assessed using ELISA.  
32  
33  
34  
35

## 36 **Secondary outcomes**

37 The secondary outcomes of this study will be changes in the following before and after 12 weeks  
38 of CC intake, and after 8 weeks of CC discontinuation:  
39  
40

- 41 • Safety and tolerability of CC measured by evaluating adverse events, hematology, and  
42 serum chemistries over the course of the study. These evaluations will include HIV viral  
43 load, glucose levels, a lipid profile and plasma levels of hsCRP and D-dimer.  
44
- 45 • Gut barrier integrity markers I-FABP and sST2, measured by ELISA.  
46
- 47 • Microbial translocation marker (1-3)- $\beta$ -D-Glucan (BDG) assessed using the Fungitell  
48 assay.  
49
- 50 • Pro-inflammatory markers (IL-1 $\beta$ , IL-6, IL-8, IL-18, IP-10, IL-17A and F, IL-22, and  
51 soluble CD14) and anti-inflammatory markers (IL-10) assessed by ELISA.  
52  
53  
54  
55  
56  
57  
58  
59  
60

- T-cell and monocyte activation levels assessed by flow cytometry using markers CD38, HLA-DR and PD-1.
- *A. muciniphila* levels in stools using qPCR.
- Microbiota composition and diversity in stools assessed using 16s rDNA sequencing.
- HIV reservoir size in blood assessed by PCR.
- Evaluate intra-patient variability using data from two baseline visits, approximately two weeks apart from each other to confirm reliability of baseline results.

### **Exploratory outcomes**

The exploratory outcomes of this study will be the following:

- Difference in HIV reservoir size from Baseline (Visit 0) to 12 weeks post-CC treatment by TILDA, performed on blood samples.
- Changes in other markers of gut damage (including plasma REG3 $\alpha$  (45)), microbial translocation (such as plasma 16S rDNA) and immune activation (T-cell activation, cytokines) in the blood and gut biopsies.

### **Sub-study outcomes**

The sub-study outcomes will be the following:

- Changes in gut mucosa architecture in a subset of participants who will consent to have colon biopsies before and at the end of the 12 weeks of CC treatment.
- Changes in inflammation in gut mucosa biopsy assessed by myeloperoxidase staining before and at the end of the 12 weeks of CC treatment.
- Changes in HIV reservoir size in biopsies using qPCR.
- Association between baseline gut microbiota composition (16S rDNA sequencing), and markers of gut integrity (I-FABP, tissue staining) and inflammation (T-cell activation, inflammatory cytokines).

## **METHODS AND ANALYSIS**

### **Study design, settings, sample size and recruitment strategy**

Trial CTN PT032 is an open label, non-randomized, single arm interventional pilot study (Clinicaltrials.gov NCT04058392); protocol version # 1.3; February 12, 2021. The study sponsor

1  
2  
3 is the Canadian Institutes of Health Research (CIHR) Canadian HIV Trials Network (CTN). The  
4 following study protocol fulfills the requirements of the 2013 Standard Protocol Items:  
5 Recommendations for Interventional Trials guidelines (46, 47).  
6  
7

8 Comparisons and assessment of outcomes will be made through various measures at  
9 baseline, during and after CC use (**figure 1 and table 1**).

10  
11 A total of 22 ART-treated participants living with HIV will be enrolled at the Chronic Viral  
12 Illness Service (CVIS) at the McGill University Health Centre (MUHC), Glen Site, Montreal, QC  
13 and the Ottawa Hospital, General Campus, Infectious Diseases Clinic, Ottawa, ON, Canada. A  
14 convenient sample size of 22 participants was chosen without formal power calculations for this  
15 pilot study, based on the Lilac study design (48, 49) and the study by Inoue *et al.* (43). This sample  
16 size accounts for an estimated loss to follow-up/non-completion of 10% for the study. It can  
17 therefore be estimated that 2 participants may not fully complete the study. There will be an  
18 optional colon biopsy sub-study. For logistical reasons, only participants recruited at the Montreal  
19 site will be given the option to participate in this sub-study, after giving informed consent to  
20 participate in the main study and being shown to be eligible for the main study (after screening).  
21 The sub-study will have a separate informed consent form. The obtained data from this study will  
22 be used for calculation of sample size for future larger studies.  
23  
24  
25  
26  
27  
28  
29  
30  
31

32 Participants will be recruited at two above-mentioned centers in Canada. Both participating  
33 medical clinics provide care to more than 2000 HIV-infected persons. Teleconferences and face-  
34 to-face meetings will be organized between the Qualified Investigators and study staff to help  
35 promote patient recruitment and follow-up during the study.  
36  
37  
38

39 Recruitment started in November 2020 and is expected to end in January 2022.  
40  
41  
42

### 43 **Inclusion criteria**

44 Participants will be eligible for the study if they meet the following criteria: (1) Male or female  
45 adults  $\geq 18$  years of age; (2) Documented HIV-1 infection by Western Blot, Enzyme Immuno  
46 Assay (EIA) or viral load assay; (3) On ART for at least 2 years, and stable ART regimen (same  
47 prescription) for at least 3 months to ensure a stabilization of inflammation markers; (4) Persistent  
48 undetectable viral load  $< 50$  copies/ml for the past 2 years. One viral blip are allowed if preceded  
49 and followed by a HIV viremia below 50 copies/ml; (5) CD4+ count  $> 200$  and a CD4+/CD8+ ratio  
50  $< 1$ , to recruit participants with increased inflammation and risk for non-AIDS comorbidities; (6)  
51  
52  
53  
54  
55  
56  
57  
58  
59  
60

1  
2  
3 Able to communicate adequately in either French or English; (7) Able and willing to provide  
4 written informed consent prior to screening; (8) As the influence of CC on pregnant women is  
5 unknown, women of childbearing potential must have a negative serum pregnancy test; (9) Women  
6 of childbearing potential must agree to use an approved methods of birth control while in the study  
7 and until 2 weeks after completion of the study; (10) Women of non-child-bearing potential as  
8 defined as either post-menopausal (12 months of spontaneous amenorrhea and  $\geq 45$  years of age)  
9 or physically incapable of becoming pregnant with documented tubal ligation, hysterectomy or  
10 bilateral oophorectomy; (11) Sexually active men with a female partner of childbearing potential  
11 must agree to use an approved methods of birth control.  
12  
13  
14  
15  
16  
17  
18  
19

### 20 **Exclusion criteria**

21  
22 Participants will not be eligible to participate in the study if they meet any of the following  
23 conditions: (1) Known allergy/hypersensitivity to Camu Camu; (2) Current AIDS-related event or  
24 serious health condition including systemic infections in the last 3 months; (3) Severe systemic  
25 diseases (e.g. uncontrolled hypertension, chronic renal failure), or active uncontrolled infections;  
26 (4) Co-infection with active Hepatitis B or C Virus; (5) Current use or have used in the past 3  
27 months: immune-modulatory agents, prophylactic antibiotics(41)/antibiotics, proton pump  
28 inhibitors, or Morphine as these drugs modulate gut microbiota; (6) Current use of aluminum  
29 containing phosphate binders, chemotherapeutics, niacin, anticoagulant and protease inhibitors  
30 (including in their ART-regimen) as increased vitamin-C levels can prevent the activity of those  
31 molecules; (7) Diagnosis of diabetes mellitus ( $HbA1c \geq 6.5\%$ ) as defined by the Canadian Clinical  
32 Practice Guidelines for the Prevention and Management of Diabetes (50); (8) Frequent use of  
33 probiotics or polyphenol-rich prebiotics (e.g. cranberry and CC powders and/or capsules) in the  
34 last 12 months; (9) Recent changes in dietary habits, intermittent fasting, chronic constipation or  
35 laxative use as these can affect gut microbiota; (10) Psychiatric or cognitive disturbance or any  
36 illness that could preclude compliance with the study; (11) Current participation in an experimental  
37 therapy study or receipt of experimental therapy within the last 6 months; (12) Women who are  
38 planning to become or who are pregnant, or breast-feeding; (13) A score of higher than 8 on a Full  
39 AUDIT questionnaire at the screening visit, suggesting an alcohol abuse problem.  
40  
41  
42  
43  
44  
45  
46  
47  
48  
49  
50  
51  
52  
53  
54  
55  
56  
57  
58  
59  
60

## Study intervention

Participants will be instructed to take 1000 mg of Camu C™ (provided by Natural Traditions, Canada) once daily administered as two 500 mg oral capsules for 12 weeks. Capsules will be taken at the same time each day with a meal, preferentially breakfast. Camu C™ can be taken with ART as no interactions are expected. The 1000 mg dose is based on the dose given to mice per mean body weight divided by 12.3 as per the Food and Drug Administration (FDA) equation to determine equivalent dosing in human vs. mice, and consistent with Health Canada's recommendations of 1-3 capsules daily (51, 52).

The interaction between CC and other medication is unknown. CC has a high vitamin C concentration and therefore any drug with negative interactions with vitamin C were included in the exclusion criteria. The vitamin C in CC could interact with aluminum in phosphate binders (possible harmful to kidneys); chemotherapeutics (CC antioxidative properties could reduce the chemotherapeutic drug's effect); protease inhibitors (vitamin C might reduce the effect of antiviral drugs containing protease inhibitors); niacins (vitamin C could reduce niacin's effect); and anticoagulants since high doses of vitamin C can reduce responses to some anticoagulants. Hence, participants will be asked to refrain from using Vitamin C supplements during the study.

Use of street drugs, cigarette smoking, non-prescription medications, and marijuana/cannabis products use will be recorded in questionnaires by a research staff at each visit. Study continuation will be based on the Investigator's judgement. In the 24 hours prior to a study visit participants will be instructed to refrain from using marijuana/cannabis products and limit alcohol to no more than one alcoholic beverage with dinner the night before the study visit as they could influence inflammation markers in blood and gut microbiota in stools.

## Adverse events and toxicity management

During each follow-up visit with the participant, information on adverse events (AEs) will be gathered and documented accordingly. AEs will be graded as mild, moderate, severe, or life-threatening and assessed by causality as probably related, possibly related, unlikely to be related or not related to Camu C™. Stable chronic conditions which are present prior to clinical trial entry and do not worsen are not considered AEs and will be accounted for in the participant's medical history.

1  
2  
3 Risk minimization, management, and assessment procedures have been implemented in  
4 the study to minimize and assess potential risks to participants who participate in this clinical study  
5 with Camu C<sup>TM</sup>. Components include specific study entry and exclusion criteria to ensure that  
6 participants who have underlying characteristics that potentially increase their risk for an adverse  
7 outcome are excluded; monitoring for adverse events for the duration of the study; overview  
8 surveillance by an Independent Data Safety Monitoring Committee (DSMC); risk identification  
9 and mitigation management over the course of the study (and the sub-study).  
10  
11  
12  
13  
14

15 When side effects are perceived to be related to Camu C<sup>TM</sup>, the Investigator can use their  
16 clinical judgment regarding whether to continue or to discontinue the study medication. If Camu  
17 C<sup>TM</sup> treatment is discontinued, the participant will be scheduled for follow-up visit(s) as required  
18 to treat the symptoms or adverse event related to Camu C<sup>TM</sup> intake.  
19  
20  
21  
22  
23

## 24 **Clinical and laboratory assessments**

### 25 Assessment of gut damage, microbial translocation, and inflammation

26  
27 To evaluate gut epithelial damage, we and others have validated markers that will be  
28 measured in the plasma by ELISA before, during and after CC intake (11, 53-55). LPS, a common  
29 marker of bacterial translocation (56), soluble Suppression of Tumorigenicity (sST2)(20) and  
30 Intestinal-Fatty Acid Binding Protein (I-FABP) will be measured to assess gut barrier integrity.  
31 Immune activation markers (sCD14) and pro-(IL-1 $\beta$ , IL-6, IL-8, TNF- $\alpha$ ) and anti-inflammatory  
32 (IL-10) cytokines will be quantified (57, 58). Activation of monocytes and CD4<sup>+</sup> and CD8<sup>+</sup> T-  
33 cells will be assessed *ex vivo* by flow cytometry with HLA-DR and CD38 staining. CD4<sup>+</sup> and  
34 CD8<sup>+</sup> T-cells will also be assessed for PD-1 expression as a marker of T-cell exhaustion. Plasma  
35 will be assayed for beta D-glucan as a marker of fungal infection(21, 58). REG3 $\alpha$  and 16S rDNA  
36 as well as other markers of microbial translocation and gut damage may be tested in plasma as  
37 well (45).  
38  
39  
40  
41  
42  
43  
44  
45  
46  
47

### 48 Assessment of microbiota composition

49 qPCR for *A. muciniphila* will be performed on fecal DNA samples as previously described  
50 by our group (48). Gut microbiota composition will be further studied by 16S and 18S rDNA  
51 sequencing to determine the impact on other beneficial microbes (e.g., *Barnesiella* and  
52 *Turicibacter*) known to respond to CC in the obesity mouse model (48).  
53  
54  
55  
56  
57  
58  
59  
60

### Assessment of HIV reservoir size

If differences in microbial translocation and/or inflammation are observed, HIV reservoirs will be quantified in blood and rectal biopsies. HIV DNA (total and integrated) and cell-associated HIV RNA (gag) will be measured in DNA and RNA obtained from isolated CD4+ T-cells from the blood (obtained by negative magnetic selection) and gut biopsies (sorted by flow cytometry). HIV DNA and cell-associated RNA measures will be performed using an ultrasensitive nested qPCR as described previously (59).

In addition, the frequency of cells with inducible proviruses will be measured in isolated CD4+ T-cells from PBMCs using the Tat/rev Induced Limiting Dilution Assay (TILDA) in the laboratory of Dr. Chomont at Baseline Week 0 and End-treatment Week 12 timepoints.

In mucosal biopsies, HIV DNA and RNA will also be quantified and localized by DNA/RNAscope (24, 60).

### Assessment of gut mucosa architecture (optional colon biopsy/sub-study)

Biopsies will be included in paraffin at the MUHC Histopathology core facility. Gut architecture will be monitored by immunochemistry and immunostaining of the epithelial tight junctions (Claudin-3/Occludin)(56). If a diminution in inflammation is noted, myeloperoxidase staining will be performed to allow for the quantification of inflammatory myeloid cells in the gut.

For other analyses, gut cells will be separated from tissues by enzyme digestion using a collagenase-based method as reported previously (61, 62). Briefly, fresh tissue biopsies will be incubated with type II collagenase for 30 minutes at 37°C in a shaking incubator. The resulting lymphocyte suspension will be stained with monoclonal Antibodies (mAbs) against CD3+, CD4+, CD8+, and myeloid markers. The total frequency of activated CD4+ and CD8+ T-cells will be determined by flow cytometry as described above.

### **Statistical analysis**

To examine the change in plasma LPS and soluble CD14 levels relative to baseline, linear mixed effects regression will be used. Time will be considered as a categorical variable in the model to allow flexible modeling of the time trend. All five measurements (two for baseline and three for follow-up visits) will be included as outcome variable in the model. Log transformation of the outcome variable or generalized mixed effects regression will be employed if normality



1  
2  
3 assumption is not satisfied. Changes in plasma markers, percentage of activated T-cells, HIV  
4 reservoir size and bacterial taxa by type in the stools samples relative to baselines will be assessed  
5 in the same fashion. Demographics including age, sex, and sexual practice will be included in  
6 multivariable analyses as they have been shown to influence microbiota composition and immune  
7 activation in ART-treated PLWH.(29, 63)  
8  
9  
10  
11  
12  
13

### 14 **Patient and public involvement**

- 15 • Initial design of the study was presented to community groups.
- 16 • Compliance questionnaires completed by participants throughout the study will allow for  
17 an assessment of their respective experiences.
- 18 • Results generated by the study are expected to be published in both formal scientific and  
19 lay language; however, will not be directly disseminated to study participants.  
20  
21  
22  
23  
24  
25

### 26 **ETHICS AND DISSEMINATION PLAN**

27 All participants will be given detailed oral and written information about the study. Consent  
28 documents describing in detail the study medication and interventions, study procedures and risks  
29 will be given to each participant and written documentation of informed consent is required prior  
30 to starting study medication/intervention. Participants must sign an informed consent document  
31 that has been approved by a participating center's research ethics board (REB) prior to any  
32 procedures being done specifically for the trial. All potential protocol amendments will be  
33 submitted to Health Canada and the respective research ethics board of the participating centers.  
34 Protocol deviations must first receive ethics approval and be reported to the data safety and  
35 monitoring committee of the CTN by the Investigator. The sole exception is when the suggested  
36 change intends to eliminate an immediate hazard to study participants.  
37  
38  
39  
40  
41  
42  
43  
44  
45  
46

### 47 **Dissemination plan**

48 The results of the trial will be disseminated through the traditional routes of scientific peer-  
49 reviewed publications, through international and national specialist conferences and through the  
50 press release by CTN. An open access journal will be chosen to ensure access to study results to  
51 all. Locally, results from the study will be shared with the McGill community. Study results will  
52 be submitted for publication in the Montréal LGBTQ+ Community journal *Fugues*. Moreover,  
53  
54  
55  
56  
57  
58  
59  
60

1  
2  
3 both the Sponsor-Investigator and Qualified Investigator will promote the Camu Camu study when  
4 attending or presenting at local, national, and international meetings.  
5  
6  
7

## 8 **CONCLUSION**

9

10 We hypothesize that treatment with CC will beneficially impact ART-treated PLWH by improving  
11 the gut microbiota composition, reducing systemic inflammation and immune action, reducing gut  
12 damage and microbial translocation, and potentially decreasing latent HIV reservoir size, thus  
13 decreasing the risk in developing non-AIDS comorbidities. This pilot trial with 22 ART-treated  
14 PLWH will provide sufficient data for future sample size calculations and set the foundation to  
15 assess the impact of CC in larger definitive studies.  
16  
17  
18  
19  
20  
21  
22  
23  
24  
25  
26  
27  
28  
29  
30  
31  
32  
33  
34  
35  
36  
37  
38  
39  
40  
41  
42  
43  
44  
45  
46  
47  
48  
49  
50  
51  
52  
53  
54  
55  
56  
57  
58  
59  
60

## Acknowledgments

The authors would like to thank Angie Massicotte, Josee Girouard, Hansi Peiris, Cynthia Dion and Cezar Iovi for their help with coordination. The authors are grateful to members of the CIHR/CTN who's insights paramount in the development of the protocol: Dr Judy Needham, Dr Joanne McBane, as well as Dana Nohynek for her help with regulatory affairs. The authors thank William Chau for building the study database.

## Author statement

Group Authorship/Collaborating Author Names: SI, BF, JO, JL, LR, SB, NS, PLL, TB, NS, MBK, BL, CTC, BR, AM, and JPR, for the Camu Camu Study Group

Contributors: J-PR and SI designed the study, with insights from JO, LR, JL, NS, NC, BR, and AM. BF and SI wrote the manuscript. JL, LR, SB, PLL, TB, NC, MBK, BL, CTC, BR, AM, will participate in data collection and analysis. All authors critically reviewed the manuscript and approved the final version.

## Funding

This study was funded by the Canadian Institutes of Health Research (CIHR) Canadian HIV trials Network (CTN) (CTN PT032 grant to SI and JPR), and by the Canadian HIV Cure Enterprise (CanCURE) (Team Grant HB-164064 to JPR). Authors who are CTN and/or CanCURE members were involved in the study design and in the writing of the manuscript, and will also be involved in data collection, analysis, and interpretation.

## Conflicts of interest

J-PR has performed contract research and/or served on Advisory Boards for Gilead Sciences Canada, Merck Canada, Abbvie, ViiV Healthcare, Bristol Myers Squibb, Janssen, Argos Pharmaceuticals from InnaVirVax and has served on the Advisory Board of Theravectys. JBA has performed contract research and/or served on Advisory Boards for Gilead Sciences Canada, Merck Canada, Abbvie, ViiV Healthcare, Bristol Myers Squibb, Janssen and Argos Pharmaceuticals. NC has received research funding from EMD Serono and has served on the Advisory Board of Gilead Sciences Canada. SI is a post-doctoral fellow from the Fonds de recherche du Quebec en santé,

1  
2  
3 and from the CIHR/CTN. B.L. is supported by a career award LE 250 from Quebec's Ministry of  
4 Health for researchers in family medicine. B.L. has received consultancy fees and/or honoraria  
5 from Gilead, Merck, and ViiV, and research funds from Gilead, Merck, and ViiV, support to attend  
6 educational conferences from ViiV Healthcare and Gilead. L.R. is a post-doctoral fellow supported  
7 by the Swiss National Science Foundation.  
8  
9  
10  
11  
12

### 13 **Patient consent for publication**

14 Not required  
15  
16  
17

### 18 **Ethics approval**

19 Canadian Institutes of Health Research/Canadian HIV Trials Network (CTN) pilot trial protocol  
20 CTNPT032. The study was approved by the Natural and Non-prescription Health Products  
21 Directorate of health Canada and the research ethics board of the McGill university Health Centre  
22 committee (number 2020-5903) and will be conducted in accordance with the Declaration of  
23 Helsinki of 1975, as revised in 2000.  
24  
25  
26  
27  
28  
29

### 30 **Data access statement**

31 The data generated by this study will be available from Dr Routy upon reasonable request after  
32 publication.  
33  
34  
35  
36  
37  
38  
39  
40  
41  
42  
43  
44  
45  
46  
47  
48  
49  
50  
51  
52  
53  
54  
55  
56  
57  
58  
59  
60

**Table 1: Schedule of Events.**

| Visit Type                                                                                | Screening      | Study Visits            |                |                        |                   |                         |
|-------------------------------------------------------------------------------------------|----------------|-------------------------|----------------|------------------------|-------------------|-------------------------|
|                                                                                           |                | Baseline 1              | Baseline 2     | Treatment              |                   | Follow-up               |
| Visit Window                                                                              | -8 to -1 weeks | Week -2 ( $\pm 7$ days) | Week 0 (Day 0) | Week 4 ( $\pm 7$ days) | Week 12 (+7 days) | Week 20 ( $\pm 7$ days) |
| <b>Procedures:</b>                                                                        |                |                         |                |                        |                   |                         |
| Visit No.                                                                                 | 1              | 2                       | 3              | 4                      | 5                 | 6                       |
| Informed Consent                                                                          | X              | X                       |                |                        |                   |                         |
| Eligibility Assessment                                                                    | X              | X                       | X              |                        |                   |                         |
| Concomitant Medication                                                                    | X              | X                       | X              | X                      | X                 | X                       |
| Medical History                                                                           | X              |                         |                |                        |                   |                         |
| Complete Physical Exam and Vital Signs                                                    | X              |                         |                |                        |                   |                         |
| Targeted Physical Exam and Vital Signs                                                    |                | X                       | X              | X                      | X                 | X                       |
| Adverse Event Assessment                                                                  |                |                         |                | X                      | X                 | X                       |
| Serum Pregnancy Test                                                                      | X              | X                       | X              | X                      | X                 | X                       |
| Hematology*                                                                               | X              | X <sup>†</sup>          | X              | X                      | X                 | X                       |
| Serum Chemistry**                                                                         | X              | X <sup>†</sup>          | X              | X                      | X                 | X                       |
| Serology***                                                                               | X              |                         | X              |                        |                   |                         |
| HIV-1 Viral Load****                                                                      | X              | X <sup>†</sup>          | X              | X                      | X                 | X                       |
| Immune activation markers/cytokines (ELISA)*****                                          |                | X                       | X              | X                      | X                 | X                       |
| Monocyte and T-cell activation markers <sup>†</sup>                                       |                | X                       | X              | X                      | X                 | X                       |
| Markers of gut barrier integrity, inflammation, and microbial translocation <sup>††</sup> |                | X                       | X              | X                      | X                 | X                       |
| Size of HIV reservoir in Latently Infected CD4 <sup>+</sup> T-cells <sup>†††</sup>        |                | X                       | X              | X                      | X                 | X                       |
| Stool sample collection and microbiota composition <sup>††††</sup>                        |                | X                       | X              | X                      | X                 | X                       |
| Alcohol use questionnaire (AUDIT-Full)                                                    | X              |                         |                |                        |                   |                         |
| Alcohol use questionnaire (AUDIT-C)                                                       |                | X                       | X              | X                      | X                 | X                       |
| Study Product Dispensation                                                                |                |                         | X              |                        |                   |                         |
| Study Product Compliance                                                                  |                |                         |                | X                      | X                 |                         |
| Colon mucosal biopsies <sup>#</sup>                                                       |                |                         | X              |                        | X                 |                         |

1  
2  
3 \*CBC, CD4 and CD8 T-cell counts, erythrocyte sedimentation rate (ESR).

4 \*\*Alkaline phosphatase, ALT, Amylase, AST, Bilirubin (total), Creatine kinase, Creatinine, D-dimer, fasting blood  
5 glucose, HbA1c, high sensitivity C-reactive protein (hsCRP), Lipase, lipid profile (total cholesterol, high density  
6 lipoprotein (HDL), low density lipoprotein (LDL), Triglycerides), serum phosphate, Urea

7 \*\*\*Serology measurements include: Cytomegalovirus (CMV), Hepatitis B virus (HBV), HCV and HIV viral load.  
8 Since HIV viral load will be measured at each visit, it was put as a separate line item.

9 \*\*\*\*Immune activation markers/cytokines include soluble CD14, pro-inflammatory cytokines (IL-1 $\beta$ , IL-6, IL-8,  
10 TNF- $\alpha$ ) and anti-inflammatory cytokine IL-10. Measured in plasma by ELISA.

11 +Monocyte and T-cell activation markers include HLA-DR and CD38. T-cell exhaustion marker: PD-1. Measured  
12 by staining and flow cytometry.

13 ++Markers of gut barrier integrity, microbial translocation, and inflammation: lipopolysaccharide, soluble ST2, I-  
14 FABP (measured in plasma by ELISA).

15 +++PBMCs will be isolated and then latent CD4 T-cells will be isolated by flow cytometry. HIV viral reservoir in  
16 the latent CD4 T-cell population will be measured by nested qPCR. More specific TILDA analysis will be  
17 performed on Baseline Week 0 and End-treatment Week 12 samples to assess the HIV viral reservoir (Exploratory  
18 analysis).

19 ++++qPCR of *A. muciniphila*, 16S and 18S rDNA sequencing for other members of the microbiota.

20 #Optional sub-study procedure.

21 † Not required when the same tests have been performed at the screening visit within the past 14 days, with the  
22 exception of CBC, CD4, CD8 (and serum pregnancy test)

## References

1. Srinivasa S, Grinspoon SK. Metabolic and body composition effects of newer antiretrovirals in HIV-infected patients. *Eur J Endocrinol* 2014;170:R185-202.
2. Deeks SG, Lewin SR, Havlir DV. The end of AIDS: HIV infection as a chronic disease. *Lancet* 2013;382:1525-33.
3. Brenchley JM, Price DA, Schacker TW, et al. Microbial translocation is a cause of systemic immune activation in chronic HIV infection. *Nat Med* 2006;12:1365-71.
4. Douek DC. Immune activation, HIV persistence, and the cure. *Top Antivir Med* 2013;21:128-32.
5. Monnig MA, Kahler CW, Cioe PA, et al. Markers of Microbial Translocation and Immune Activation Predict Cognitive Processing Speed in Heavy-Drinking Men Living with HIV. *Microorganisms* 2017;5.
6. Neff CP, Krueger O, Xiong K, et al. Fecal Microbiota Composition Drives Immune Activation in HIV-infected Individuals. *EBioMedicine* 2018;30:192-202.
7. Sui Y, Dzutsev A, Venzon D, et al. Influence of gut microbiome on mucosal immune activation and SHIV viral transmission in naive macaques. *Mucosal Immunol* 2018;11:1219-29.
8. Vazquez-Castellanos JF, Serrano-Villar S, Latorre A, et al. Altered metabolism of gut microbiota contributes to chronic immune activation in HIV-infected individuals. *Mucosal Immunol* 2015;8:760-72.
9. Zevin AS, McKinnon L, Burgener A, et al. Microbial translocation and microbiome dysbiosis in HIV-associated immune activation. *Curr Opin HIV AIDS* 2016;11:182-90.
10. Clayton KL, Garcia JV, Clements JE, et al. HIV Infection of Macrophages: Implications for Pathogenesis and Cure. *Pathog Immun* 2017;2:179-92.
11. Mehraj V, Jenabian MA, Ponte R, et al. The plasma levels of soluble ST2 as a marker of gut mucosal damage in early HIV infection. *AIDS* 2016;30:1617-27.
12. Gosselin A, Monteiro P, Chomont N, et al. Peripheral blood CCR4+CCR6+ and CXCR3+CCR6+CD4+ T cells are highly permissive to HIV-1 infection. *J Immunol* 2010;184:1604-16.
13. Gosselin A, Wiche Salinas TR, Planas D, et al. HIV persists in CCR6+CD4+ T cells from colon and blood during antiretroviral therapy. *AIDS* 2017;31:35-48.
14. Tincati C, Douek DC, Marchetti G. Gut barrier structure, mucosal immunity and intestinal microbiota in the pathogenesis and treatment of HIV infection. *AIDS Res Ther* 2016;13:19.
15. Deeks SG, Phillips AN. HIV infection, antiretroviral treatment, ageing, and non-AIDS related morbidity. *BMJ* 2009;338:a3172.
16. Gandhi RT, McMahon DK, Bosch RJ, et al. Levels of HIV-1 persistence on antiretroviral therapy are not associated with markers of inflammation or activation. *PLoS Pathog* 2017;13:e1006285.
17. Hoenigl M, Moser CB, Funderburg N, et al. Soluble Urokinase Plasminogen Activator Receptor Is Predictive of Non-AIDS Events During Antiretroviral Therapy-mediated Viral Suppression. *Clin Infect Dis* 2019;69:676-86.
18. Marchetti G, Tincati C, Silvestri G. Microbial translocation in the pathogenesis of HIV infection and AIDS. *Clin Microbiol Rev* 2013;26:2-18.
19. Sandler NG, Douek DC. Microbial translocation in HIV infection: causes, consequences and treatment opportunities. *Nat Rev Microbiol* 2012;10:655-66.

- 1
- 2
- 3
- 4 20. Mehraj V, Ramendra R, Isnard S, et al. (1-3)-Beta-D-Glucan antigenemia contributes to 1
- 5 immune activation during HIV infection. *Clin Infect Dis* 2018:Submitted.
- 6 21. Isnard S, Lin J, Simeng B, et al. Gut Leakage of fungal-related products: Turning up the
- 7 heat for HIV infection *Front Immunol* 2021.
- 8 22. Peng X, Isnard S, Lin J, et al. Differences in HIV burden in the inflamed and non-inflamed
- 9 colon from a person living with HIV and ulcerative colitis. *J Virus Erad* 2021;7:100033.
- 10 23. Stevenson M, Stanwick TL, Dempsey MP, et al. HIV-1 replication is controlled at the level
- 11 of T cell activation and proviral integration. *EMBO J* 1990;9:1551-60.
- 12 24. Chomont N, El-Far M, Ancuta P, et al. HIV reservoir size and persistence are driven by T
- 13 cell survival and homeostatic proliferation. *Nat Med* 2009;15:893-900.
- 14 25. Anhe FF, Varin TV, Le Barz M, et al. Gut Microbiota Dysbiosis in Obesity-Linked Metabolic
- 15 Diseases and Prebiotic Potential of Polyphenol-Rich Extracts. *Curr Obes Rep* 2015;4:389-400.
- 16 26. Dao MC, Everard A, Aron-Wisnewsky J, et al. Akkermansia muciniphila and improved
- 17 metabolic health during a dietary intervention in obesity: relationship with gut microbiome
- 18 richness and ecology. *Gut* 2016;65:426-36.
- 19 27. Sepich-Poore GD, Zitvogel L, Straussman R, et al. The microbiome and human cancer.
- 20 *Science* 2021;371.
- 21 28. Routy B, Le Chatelier E, Derosa L, et al. Gut microbiome influences efficacy of PD-1-based
- 22 immunotherapy against epithelial tumors. *Science* 2018;359:91-7.
- 23 29. Vujkovic-Cvijin I, Somsouk M. HIV and the Gut Microbiota: Composition, Consequences,
- 24 and Avenues for Amelioration. *Curr HIV/AIDS Rep* 2019;16:204-13.
- 25 30. Lu W, Feng Y, Jing F, et al. Association Between Gut Microbiota and CD4 Recovery in HIV-1
- 26 Infected Patients. *Front Microbiol* 2018;9:1451.
- 27 31. Vujkovic-Cvijin I, Sortino O, Verheij E, et al. HIV-associated gut dysbiosis is independent of
- 28 sexual practice and correlates with noncommunicable diseases. *Nat Commun* 2020;11:2448.
- 29 32. Anhe FF, Roy D, Pilon G, et al. A polyphenol-rich cranberry extract protects from diet-
- 30 induced obesity, insulin resistance and intestinal inflammation in association with increased
- 31 Akkermansia spp. population in the gut microbiota of mice. *Gut* 2015;64:872-83.
- 32 33. Anhe FF, Nachbar RT, Varin TV, et al. Treatment with camu camu (*Myrciaria dubia*)
- 33 prevents obesity by altering the gut microbiota and increasing energy expenditure in diet-
- 34 induced obese mice. *Gut* 2018.
- 35 34. Anhe FF, Nachbar RT, Varin TV, et al. A polyphenol-rich cranberry extract reverses insulin
- 36 resistance and hepatic steatosis independently of body weight loss. *Mol Metab* 2017;6:1563-73.
- 37 35. Anhe FF, Pilon G, Roy D, et al. Triggering Akkermansia with dietary polyphenols: A new
- 38 weapon to combat the metabolic syndrome? *Gut Microbes* 2016;7:146-53.
- 39 36. Ouyang J, Lin J, Isnard S, et al. The Bacterium Akkermansia muciniphila: A Sentinel for Gut
- 40 Permeability and Its Relevance to HIV-Related Inflammation. *Front Immunol* 2020;11:645.
- 41 37. Cani PD. Human gut microbiome: hopes, threats and promises. *Gut* 2018;67:1716-25.
- 42 38. Everard A, Belzer C, Geurts L, et al. Cross-talk between Akkermansia muciniphila and
- 43 intestinal epithelium controls diet-induced obesity. *Proc Natl Acad Sci U S A* 2013;110:9066-71.
- 44 39. Reunanen J, Kainulainen V, Huuskonen L, et al. Akkermansia muciniphila Adheres to
- 45 Enterocytes and Strengthens the Integrity of the Epithelial Cell Layer. *Appl Environ Microbiol*
- 46 2015;81:3655-62.
- 47
- 48
- 49
- 50
- 51
- 52
- 53
- 54
- 55
- 56
- 57
- 58
- 59
- 60



- 1
- 2
- 3
- 4 40. Grajeda-Iglesias C, Durand S, Daillère R, et al. Oral administration of Akkermansia
- 5 muciniphila elevates systemic antiaging and anticancer metabolites. *Aging (Albany NY)*
- 6 2021;13:6375-405.
- 7 41. Etxeberria U, Arias N, Boque N, et al. Reshaping faecal gut microbiota composition by the
- 8 intake of trans-resveratrol and quercetin in high-fat sucrose diet-fed rats. *J Nutr Biochem*
- 9 2015;26:651-60.
- 10 42. Li Z, Henning SM, Lee RP, et al. Pomegranate extract induces ellagitannin metabolite
- 11 formation and changes stool microbiota in healthy volunteers. *Food Funct* 2015;6:2487-95.
- 12 43. Inoue T, Komoda H, Uchida T, et al. Tropical fruit camu-camu (*Myrciaria dubia*) has anti-
- 13 oxidative and anti-inflammatory properties. *J Cardiol* 2008;52:127-32.
- 14 44. Langley PC, Pergolizzi JV, Jr., Taylor R, Jr., et al. Antioxidant and associated capacities of
- 15 Camu camu (*Myrciaria dubia*): a systematic review. *J Altern Complement Med* 2015;21:8-14.
- 16 45. Isnard S, Ramendra R, Dupuy FP, et al. Plasma Levels of C-Type Lectin REG3alpha and Gut
- 17 Damage in People With Human Immunodeficiency Virus. *J Infect Dis* 2020;221:110-21.
- 18 46. Chan A-W, Tetzlaff JM, Gøtzsche PC, et al. SPIRIT 2013 explanation and elaboration:
- 19 guidance for protocols of clinical trials. *BMJ : British Medical Journal* 2013;346:e7586.
- 20 47. SPIRIT 2013 Statement: Defining Standard Protocol Items for Clinical Trials. *Annals of*
- 21 *Internal Medicine* 2013;158:200-7.
- 22 48. Isnard S, Lin J, Fombuena B, et al. Repurposing Metformin in Nondiabetic People With
- 23 HIV: Influence on Weight and Gut Microbiota. *Open Forum Infect Dis* 2020;7:ofaa338.
- 24 49. Routy JP, Isnard S, Mehraj V, et al. Effect of metformin on the size of the HIV reservoir in
- 25 non-diabetic ART-treated individuals: single-arm non-randomised Lilac pilot study protocol. *BMJ*
- 26 *Open* 2019;9:e028444.
- 27 50. Committee CDACPE. Diabetes Canada 2018: Clinical Practice Guidelines for the
- 28 Prevention and Management of Diabetes in Canada. *Canadian Journal of Diabetes* 2018;42:S1-
- 29 S325.
- 30 51. Canada H. Camu C 2018 [05 Dec 2018]. Available from: [https://health-](https://health-products.canada.ca/lnhpd-bdpsnh/info.do?licence=80042046)
- 31 [products.canada.ca/lnhpd-bdpsnh/info.do?licence=80042046](https://health-products.canada.ca/lnhpd-bdpsnh/info.do?licence=80042046).
- 32 52. Nair AB, Jacob S. A simple practice guide for dose conversion between animals and
- 33 human. *J Basic Clin Pharm* 2016;7:27-31.
- 34 53. Mehraj V, Ramendra R, Isnard S, et al. Circulating (1->3)-beta-D-Glucan is associated with
- 35 immune activation during HIV infection. *Clin Infect Dis* 2019.
- 36 54. Ramendra R, Isnard S, Mehraj V, et al. Circulating LPS and (1->3)-b-D-Glucan: A folie à
- 37 deux contributing to HIV-associated immune activation. *Frontiers in Immunology* 2019.
- 38 55. Younas M, Psomas C, Mehraj V, et al. Plasma Level of Soluble ST2 in Chronically Infected
- 39 HIV-1 Patients with Suppressed Viremia. *Open AIDS J* 2017;11:32-5.
- 40 56. Ortiz AM, Flynn JK, DiNapoli SR, et al. Experimental microbial dysbiosis does not promote
- 41 disease progression in SIV-infected macaques. *Nat Med* 2018;24:1313-6.
- 42 57. Mehraj V, Ramendra R, Isnard S, et al. CXCL13 as a Biomarker of Immune Activation During
- 43 Early and Chronic HIV Infection. *Front Immunol* 2019;10:289.
- 44 58. Mehraj V, Ramendra R, Isnard S, et al. Circulating (1->3)-beta-D-glucan Is Associated With
- 45 Immune Activation During Human Immunodeficiency Virus Infection. *Clin Infect Dis* 2020;70:232-
- 46 41.
- 47
- 48
- 49
- 50
- 51
- 52
- 53
- 54
- 55
- 56
- 57
- 58
- 59
- 60

- 1  
2  
3 59. Vandergeeten C, Fromentin R, Merlini E, et al. Cross-clade ultrasensitive PCR-based assays  
4 to measure HIV persistence in large-cohort studies. *J Virol* 2014;88:12385-96.  
5  
6 60. Procopio FA, Fromentin R, Kulpa DA, et al. A Novel Assay to Measure the Magnitude of  
7 the Inducible Viral Reservoir in HIV-infected Individuals. *EBioMedicine* 2015;2:874-83.  
8  
9 61. Shacklett BL, Critchfield JW, Ferre AL, et al. Mucosal T-cell responses to HIV: responding  
10 at the front lines. *J Intern Med* 2009;265:58-66.  
11  
12 62. Planas D, Pagliuzza A, Ponte R, et al. LILAC pilot study: Effects of metformin on mTOR  
13 activation and HIV reservoir persistence during antiretroviral therapy. *EBioMedicine*  
14 2021;65:103270.  
15  
16 63. Vujkovic-Cvijin I, Sortino O, Verheij E, et al. Colonic microbiota is altered in treated HIV  
17 infection independently of sexual practice and correlates with HIV disease progression.  
18 *International Workshop on Microbiome in HIV* 2019;Abstract 14.  
19  
20  
21  
22

### 23 Figure legend

#### 24 **Figure 1:** Study flow chart.

25  
26  
27 Visit 1, the Screening visit, will take place 1-8 weeks prior to the second Baseline visit (Week 0,  
28 Visit 3). At the Screening visit the informed consent document will be explained to the  
29 participant and will be signed prior to any screening and study activities. Two Baseline visits will  
30 be conducted, the second one being at Week 0 and all visits after that will be relative to this  
31 Baseline Week 0 Visit (Visit 3, Day 0). Data collected at these two Baseline visits will be  
32 directly compared to determine intra-patient variability. Camu Camu treatment will be a single  
33 daily dose of 1000 mg (2\*500 mg Camu C<sup>TM</sup> capsules) taken with a meal, at the same time each  
34 day for 12 weeks. Treatment and post-treatment visit dates (Visit 4, Week 4 and Visit 6, Week  
35 20) can vary  $\pm$  7 days according to participant and/or research team availability. Visit 5 at Week  
36 12 can vary +7 days to ensure the participant has completed 12 weeks of Camu Camu treatment  
37 prior to the end-of-treatment visit. See Section 8 Schedule of Events (Table 1) to see more test  
38 details.  
39  
40  
41  
42

43 \*The consent form for the optional gut biopsy will also be explained, but consent for this will not  
44 be necessary to be part of the main study. The sub-study is only available to participants at the  
45 Montreal site.  
46

47 #Optional gut biopsies will be taken for the sub-study at indicated time points.  
48  
49  
50  
51  
52  
53  
54  
55  
56  
57  
58  
59  
60



Figure 1: Study flow chart.

Visit 1, the Screening visit, will take place 1-8 weeks prior to the second Baseline visit (Week 0, Visit 3). At the Screening visit the informed consent document will be explained to the participant and will be signed prior to any screening and study activities. Two Baseline visits will be conducted, the second one being at Week 0 and all visits after that will be relative to this Baseline Week 0 Visit (Visit 3, Day 0). Data collected at these two Baseline visits will be directly compared to determine intra-patient variability. Camu Camu treatment will be a single daily dose of 1000 mg (2\*500 mg Camu CTM capsules) taken with a meal, at the same time each day for 12 weeks. Treatment and post-treatment visit dates (Visit 4, Week 4 and Visit 6, Week 20) can vary  $\pm 7$  days according to participant and/or research team availability. Visit 5 at Week 12 can vary +7 days to ensure the participant has completed 12 weeks of Camu Camu treatment prior to the end-of-treatment visit. See Section 8 Schedule of Events (Table 1) to see more test details.

\*The consent form for the optional gut biopsy will also be explained, but consent for this will not be necessary to be part of the main study. The sub-study is only available to participants at the Montreal site.

#Optional gut biopsies will be taken for the sub-study at indicated time points.

164x68mm (150 x 150 DPI)



SPIRIT 2013 Checklist: Recommended items to address in a clinical trial protocol and related documents\*

Camu Camu pilot study (CTN PT032). Isnard et al.

| Section/item                      | Item No | Description                                                                                                                                                                                                                                                                              | Page number |
|-----------------------------------|---------|------------------------------------------------------------------------------------------------------------------------------------------------------------------------------------------------------------------------------------------------------------------------------------------|-------------|
| <b>Administrative information</b> |         |                                                                                                                                                                                                                                                                                          |             |
| Title                             | 1       | Descriptive title identifying the study design, population, interventions, and, if applicable, trial acronym                                                                                                                                                                             | 1           |
| Trial registration                | 2a      | Trial identifier and registry name. If not yet registered, name of intended registry                                                                                                                                                                                                     | 2           |
|                                   | 2b      | All items from the World Health Organization Trial Registration Data Set                                                                                                                                                                                                                 | NA          |
| Protocol version                  | 3       | Date and version identifier                                                                                                                                                                                                                                                              | 8           |
| Funding                           | 4       | Sources and types of financial, material, and other support                                                                                                                                                                                                                              | 8, 16       |
| Roles and responsibilities        | 5a      | Names, affiliations, and roles of protocol contributors                                                                                                                                                                                                                                  | 8           |
|                                   | 5b      | Name and contact information for the trial sponsor                                                                                                                                                                                                                                       | 1           |
|                                   | 5c      | Role of study sponsor and funders, if any, in study design; collection, management, analysis, and interpretation of data; writing of the report; and the decision to submit the report for publication, including whether they will have ultimate authority over any of these activities | 8           |
|                                   | 5d      | Composition, roles, and responsibilities of the coordinating centre, steering committee, endpoint adjudication committee, data management team, and other individuals or groups overseeing the trial, if applicable (see Item 21a for data monitoring committee)                         | NA          |
| <b>Introduction</b>               |         |                                                                                                                                                                                                                                                                                          |             |
| Background and rationale          | 6a      | Description of research question and justification for undertaking the trial, including summary of relevant studies (published and unpublished) examining benefits and harms for each intervention                                                                                       | 4-7         |

|    |                                                           |     |                                                                                                                                                                                                                                                                                                                                                                                |                   |
|----|-----------------------------------------------------------|-----|--------------------------------------------------------------------------------------------------------------------------------------------------------------------------------------------------------------------------------------------------------------------------------------------------------------------------------------------------------------------------------|-------------------|
| 1  |                                                           |     |                                                                                                                                                                                                                                                                                                                                                                                |                   |
| 2  |                                                           | 6b  | Explanation for choice of comparators                                                                                                                                                                                                                                                                                                                                          | 8,9               |
| 3  |                                                           |     |                                                                                                                                                                                                                                                                                                                                                                                |                   |
| 4  | Objectives                                                | 7   | Specific objectives or hypotheses                                                                                                                                                                                                                                                                                                                                              | 7,8               |
| 5  |                                                           |     |                                                                                                                                                                                                                                                                                                                                                                                |                   |
| 6  | Trial design                                              | 8   | Description of trial design including type of trial (eg, parallel group, crossover, factorial, single group), allocation ratio, and framework (eg, superiority, equivalence, noninferiority, exploratory)                                                                                                                                                                      | 8,9               |
| 7  |                                                           |     |                                                                                                                                                                                                                                                                                                                                                                                |                   |
| 8  |                                                           |     |                                                                                                                                                                                                                                                                                                                                                                                |                   |
| 9  |                                                           |     |                                                                                                                                                                                                                                                                                                                                                                                |                   |
| 10 |                                                           |     |                                                                                                                                                                                                                                                                                                                                                                                |                   |
| 11 |                                                           |     |                                                                                                                                                                                                                                                                                                                                                                                |                   |
| 12 | <b>Methods: Participants, interventions, and outcomes</b> |     |                                                                                                                                                                                                                                                                                                                                                                                |                   |
| 13 |                                                           |     |                                                                                                                                                                                                                                                                                                                                                                                |                   |
| 14 | Study setting                                             | 9   | Description of study settings (eg, community clinic, academic hospital) and list of countries where data will be collected. Reference to where list of study sites can be obtained                                                                                                                                                                                             | 9                 |
| 15 |                                                           |     |                                                                                                                                                                                                                                                                                                                                                                                |                   |
| 16 |                                                           |     |                                                                                                                                                                                                                                                                                                                                                                                |                   |
| 17 |                                                           |     |                                                                                                                                                                                                                                                                                                                                                                                |                   |
| 18 |                                                           |     |                                                                                                                                                                                                                                                                                                                                                                                |                   |
| 19 | Eligibility criteria                                      | 10  | Inclusion and exclusion criteria for participants. If applicable, eligibility criteria for study centres and individuals who will perform the interventions (eg, surgeons, psychotherapists)                                                                                                                                                                                   | 9,10              |
| 20 |                                                           |     |                                                                                                                                                                                                                                                                                                                                                                                |                   |
| 21 |                                                           |     |                                                                                                                                                                                                                                                                                                                                                                                |                   |
| 22 |                                                           |     |                                                                                                                                                                                                                                                                                                                                                                                |                   |
| 23 |                                                           |     |                                                                                                                                                                                                                                                                                                                                                                                |                   |
| 24 |                                                           |     |                                                                                                                                                                                                                                                                                                                                                                                |                   |
| 25 | Interventions                                             | 11a | Interventions for each group with sufficient detail to allow replication, including how and when they will be administered                                                                                                                                                                                                                                                     | 10,11             |
| 26 |                                                           |     |                                                                                                                                                                                                                                                                                                                                                                                |                   |
| 27 |                                                           |     |                                                                                                                                                                                                                                                                                                                                                                                |                   |
| 28 |                                                           |     |                                                                                                                                                                                                                                                                                                                                                                                |                   |
| 29 |                                                           |     |                                                                                                                                                                                                                                                                                                                                                                                |                   |
| 30 |                                                           | 11b | Criteria for discontinuing or modifying allocated interventions for a given trial participant (eg, drug dose change in response to harms, participant request, or improving/worsening disease)                                                                                                                                                                                 | 10,11             |
| 31 |                                                           |     |                                                                                                                                                                                                                                                                                                                                                                                |                   |
| 32 |                                                           |     |                                                                                                                                                                                                                                                                                                                                                                                |                   |
| 33 |                                                           |     |                                                                                                                                                                                                                                                                                                                                                                                |                   |
| 34 |                                                           |     |                                                                                                                                                                                                                                                                                                                                                                                |                   |
| 35 |                                                           | 11c | Strategies to improve adherence to intervention protocols, and any procedures for monitoring adherence (eg, drug tablet return, laboratory tests)                                                                                                                                                                                                                              | 12                |
| 36 |                                                           |     |                                                                                                                                                                                                                                                                                                                                                                                |                   |
| 37 |                                                           |     |                                                                                                                                                                                                                                                                                                                                                                                |                   |
| 38 |                                                           |     |                                                                                                                                                                                                                                                                                                                                                                                |                   |
| 39 |                                                           |     |                                                                                                                                                                                                                                                                                                                                                                                |                   |
| 40 |                                                           | 11d | Relevant concomitant care and interventions that are permitted or prohibited during the trial                                                                                                                                                                                                                                                                                  | 12                |
| 41 |                                                           |     |                                                                                                                                                                                                                                                                                                                                                                                |                   |
| 42 |                                                           |     |                                                                                                                                                                                                                                                                                                                                                                                |                   |
| 43 | Outcomes                                                  | 12  | Primary, secondary, and other outcomes, including the specific measurement variable (eg, systolic blood pressure), analysis metric (eg, change from baseline, final value, time to event), method of aggregation (eg, median, proportion), and time point for each outcome. Explanation of the clinical relevance of chosen efficacy and harm outcomes is strongly recommended | 7,8               |
| 44 |                                                           |     |                                                                                                                                                                                                                                                                                                                                                                                |                   |
| 45 |                                                           |     |                                                                                                                                                                                                                                                                                                                                                                                |                   |
| 46 |                                                           |     |                                                                                                                                                                                                                                                                                                                                                                                |                   |
| 47 |                                                           |     |                                                                                                                                                                                                                                                                                                                                                                                |                   |
| 48 |                                                           |     |                                                                                                                                                                                                                                                                                                                                                                                |                   |
| 49 |                                                           |     |                                                                                                                                                                                                                                                                                                                                                                                |                   |
| 50 |                                                           |     |                                                                                                                                                                                                                                                                                                                                                                                |                   |
| 51 |                                                           |     |                                                                                                                                                                                                                                                                                                                                                                                |                   |
| 52 | Participant timeline                                      | 13  | Time schedule of enrolment, interventions (including any run-ins and washouts), assessments, and visits for participants. A schematic diagram is highly recommended (see Figure)                                                                                                                                                                                               | Figure 1, table 1 |
| 53 |                                                           |     |                                                                                                                                                                                                                                                                                                                                                                                |                   |
| 54 |                                                           |     |                                                                                                                                                                                                                                                                                                                                                                                |                   |
| 55 |                                                           |     |                                                                                                                                                                                                                                                                                                                                                                                |                   |
| 56 |                                                           |     |                                                                                                                                                                                                                                                                                                                                                                                |                   |
| 57 |                                                           |     |                                                                                                                                                                                                                                                                                                                                                                                |                   |
| 58 |                                                           |     |                                                                                                                                                                                                                                                                                                                                                                                |                   |
| 59 |                                                           |     |                                                                                                                                                                                                                                                                                                                                                                                |                   |
| 60 |                                                           |     |                                                                                                                                                                                                                                                                                                                                                                                |                   |

|   |             |    |                                                         |   |
|---|-------------|----|---------------------------------------------------------|---|
| 1 |             |    |                                                         |   |
| 2 | Sample size | 14 | Estimated number of participants needed to achieve      | 9 |
| 3 |             |    | study objectives and how it was determined, including   |   |
| 4 |             |    | clinical and statistical assumptions supporting any     |   |
| 5 |             |    | sample size calculations                                |   |
| 6 |             |    |                                                         |   |
| 7 | Recruitment | 15 | Strategies for achieving adequate participant enrolment | 9 |
| 8 |             |    | to reach target sample size                             |   |
| 9 |             |    |                                                         |   |

### Methods: Assignment of interventions (for controlled trials)

#### Allocation:

|    |                |     |                                                            |    |
|----|----------------|-----|------------------------------------------------------------|----|
| 14 | Sequence       | 16a | Method of generating the allocation sequence (eg,          | NA |
| 15 | generation     |     | computer-generated random numbers), and list of any        |    |
| 16 |                |     | factors for stratification. To reduce predictability of a  |    |
| 17 |                |     | random sequence, details of any planned restriction (eg,   |    |
| 18 |                |     | blocking) should be provided in a separate document that   |    |
| 19 |                |     | is unavailable to those who enrol participants or assign   |    |
| 20 |                |     | interventions                                              |    |
| 21 |                |     |                                                            |    |
| 22 |                |     |                                                            |    |
| 23 |                |     |                                                            |    |
| 24 | Allocation     | 16b | Mechanism of implementing the allocation sequence (eg,     | NA |
| 25 | concealment    |     | central telephone; sequentially numbered, opaque,          |    |
| 26 | mechanism      |     | sealed envelopes), describing any steps to conceal the     |    |
| 27 |                |     | sequence until interventions are assigned                  |    |
| 28 |                |     |                                                            |    |
| 29 |                |     |                                                            |    |
| 30 | Implementation | 16c | Who will generate the allocation sequence, who will enrol  | NA |
| 31 |                |     | participants, and who will assign participants to          |    |
| 32 |                |     | interventions                                              |    |
| 33 |                |     |                                                            |    |
| 34 | Blinding       | 17a | Who will be blinded after assignment to interventions (eg, | NA |
| 35 | (masking)      |     | trial participants, care providers, outcome assessors,     |    |
| 36 |                |     | data analysts), and how                                    |    |
| 37 |                |     |                                                            |    |
| 38 |                |     |                                                            |    |
| 39 |                | 17b | If blinded, circumstances under which unblinding is        | NA |
| 40 |                |     | permissible, and procedure for revealing a participant's   |    |
| 41 |                |     | allocated intervention during the trial                    |    |
| 42 |                |     |                                                            |    |

### Methods: Data collection, management, and analysis

|    |                 |     |                                                             |       |
|----|-----------------|-----|-------------------------------------------------------------|-------|
| 45 | Data collection | 18a | Plans for assessment and collection of outcome,             | 12,13 |
| 46 | methods         |     | baseline, and other trial data, including any related       |       |
| 47 |                 |     | processes to promote data quality (eg, duplicate            |       |
| 48 |                 |     | measurements, training of assessors) and a description      |       |
| 49 |                 |     | of study instruments (eg, questionnaires, laboratory        |       |
| 50 |                 |     | tests) along with their reliability and validity, if known. |       |
| 51 |                 |     | Reference to where data collection forms can be found, if   |       |
| 52 |                 |     | not in the protocol                                         |       |
| 53 |                 |     |                                                             |       |
| 54 |                 |     |                                                             |       |
| 55 |                 |     |                                                             |       |
| 56 |                 | 18b | Plans to promote participant retention and complete         | 13    |
| 57 |                 |     | follow-up, including list of any outcome data to be         |       |
| 58 |                 |     | collected for participants who discontinue or deviate from  |       |
| 59 |                 |     | intervention protocols                                      |       |
| 60 |                 |     |                                                             |       |

|    |                                 |     |                                                             |       |
|----|---------------------------------|-----|-------------------------------------------------------------|-------|
| 1  |                                 |     |                                                             |       |
| 2  | Data                            | 19  | Plans for data entry, coding, security, and storage,        | NA    |
| 3  | management                      |     | including any related processes to promote data quality     |       |
| 4  |                                 |     | (eg, double data entry; range checks for data values).      |       |
| 5  |                                 |     | Reference to where details of data management               |       |
| 6  |                                 |     | procedures can be found, if not in the protocol             |       |
| 7  |                                 |     |                                                             |       |
| 8  |                                 |     |                                                             |       |
| 9  | Statistical                     | 20a | Statistical methods for analysing primary and secondary     | 13    |
| 10 | methods                         |     | outcomes. Reference to where other details of the           |       |
| 11 |                                 |     | statistical analysis plan can be found, if not in the       |       |
| 12 |                                 |     | protocol                                                    |       |
| 13 |                                 |     |                                                             |       |
| 14 |                                 | 20b | Methods for any additional analyses (eg, subgroup and       | 13    |
| 15 |                                 |     | adjusted analyses)                                          |       |
| 16 |                                 |     |                                                             |       |
| 17 |                                 | 20c | Definition of analysis population relating to protocol non- | NA    |
| 18 |                                 |     | adherence (eg, as randomised analysis), and any             |       |
| 19 |                                 |     | statistical methods to handle missing data (eg, multiple    |       |
| 20 |                                 |     | imputation)                                                 |       |
| 21 |                                 |     |                                                             |       |
| 22 |                                 |     |                                                             |       |
| 23 | <b>Methods: Monitoring</b>      |     |                                                             |       |
| 24 |                                 |     |                                                             |       |
| 25 | Data monitoring                 | 21a | Composition of data monitoring committee (DMC);             | 12    |
| 26 |                                 |     | summary of its role and reporting structure; statement of   |       |
| 27 |                                 |     | whether it is independent from the sponsor and              |       |
| 28 |                                 |     | competing interests; and reference to where further         |       |
| 29 |                                 |     | details about its charter can be found, if not in the       |       |
| 30 |                                 |     | protocol. Alternatively, an explanation of why a DMC is     |       |
| 31 |                                 |     | not needed                                                  |       |
| 32 |                                 |     |                                                             |       |
| 33 |                                 |     |                                                             |       |
| 34 |                                 | 21b | Description of any interim analyses and stopping            | 12    |
| 35 |                                 |     | guidelines, including who will have access to these         |       |
| 36 |                                 |     | interim results and make the final decision to terminate    |       |
| 37 |                                 |     | the trial                                                   |       |
| 38 |                                 |     |                                                             |       |
| 39 |                                 |     |                                                             |       |
| 40 | Harms                           | 22  | Plans for collecting, assessing, reporting, and managing    | 11,12 |
| 41 |                                 |     | solicited and spontaneously reported adverse events and     |       |
| 42 |                                 |     | other unintended effects of trial interventions or trial    |       |
| 43 |                                 |     | conduct                                                     |       |
| 44 |                                 |     |                                                             |       |
| 45 |                                 |     |                                                             |       |
| 46 | Auditing                        | 23  | Frequency and procedures for auditing trial conduct, if     | 9     |
| 47 |                                 |     | any, and whether the process will be independent from       |       |
| 48 |                                 |     | investigators and the sponsor                               |       |
| 49 |                                 |     |                                                             |       |
| 50 |                                 |     |                                                             |       |
| 51 | <b>Ethics and dissemination</b> |     |                                                             |       |
| 52 |                                 |     |                                                             |       |
| 53 | Research ethics                 | 24  | Plans for seeking research ethics committee/institutional   |       |
| 54 | approval                        |     | review board (REC/IRB) approval                             |       |
| 55 |                                 |     |                                                             |       |
| 56 |                                 |     |                                                             |       |
| 57 |                                 |     |                                                             |       |
| 58 |                                 |     |                                                             |       |
| 59 |                                 |     |                                                             |       |
| 60 |                                 |     |                                                             |       |

|    |                   |     |                                                                |            |
|----|-------------------|-----|----------------------------------------------------------------|------------|
| 1  |                   |     |                                                                |            |
| 2  | Protocol          | 25  | Plans for communicating important protocol modifications       | 14         |
| 3  | amendments        |     | (eg, changes to eligibility criteria, outcomes, analyses) to   |            |
| 4  |                   |     | relevant parties (eg, investigators, REC/IRBs, trial           |            |
| 5  |                   |     | participants, trial registries, journals, regulators)          |            |
| 6  |                   |     |                                                                |            |
| 7  | Consent or assent | 26a | Who will obtain informed consent or assent from potential      | 9          |
| 8  |                   |     | trial participants or authorised surrogates, and how (see      |            |
| 9  |                   |     | Item 32)                                                       |            |
| 10 |                   |     |                                                                |            |
| 11 |                   |     |                                                                |            |
| 12 |                   | 26b | Additional consent provisions for collection and use of        | 9, table 1 |
| 13 |                   |     | participant data and biological specimens in ancillary         |            |
| 14 |                   |     | studies, if applicable                                         |            |
| 15 |                   |     |                                                                |            |
| 16 | Confidentiality   | 27  | How personal information about potential and enrolled          | 14         |
| 17 |                   |     | participants will be collected, shared, and maintained in      |            |
| 18 |                   |     | order to protect confidentiality before, during, and after     |            |
| 19 |                   |     | the trial                                                      |            |
| 20 |                   |     |                                                                |            |
| 21 |                   |     |                                                                |            |
| 22 | Declaration of    | 28  | Financial and other competing interests for principal          | 16,17      |
| 23 | interests         |     | investigators for the overall trial and each study site        |            |
| 24 |                   |     |                                                                |            |
| 25 | Access to data    | 29  | Statement of who will have access to the final trial           | 17         |
| 26 |                   |     | dataset, and disclosure of contractual agreements that         |            |
| 27 |                   |     | limit such access for investigators                            |            |
| 28 |                   |     |                                                                |            |
| 29 |                   |     |                                                                |            |
| 30 | Ancillary and     | 30  | Provisions, if any, for ancillary and post-trial care, and for | 11,12      |
| 31 | post-trial care   |     | compensation to those who suffer harm from trial               |            |
| 32 |                   |     | participation                                                  |            |
| 33 |                   |     |                                                                |            |
| 34 | Dissemination     | 31a | Plans for investigators and sponsor to communicate trial       | 14         |
| 35 | policy            |     | results to participants, healthcare professionals, the         |            |
| 36 |                   |     | public, and other relevant groups (eg, via publication,        |            |
| 37 |                   |     | reporting in results databases, or other data sharing          |            |
| 38 |                   |     | arrangements), including any publication restrictions          |            |
| 39 |                   |     |                                                                |            |
| 40 |                   |     |                                                                |            |
| 41 |                   | 31b | Authorship eligibility guidelines and any intended use of      | NA         |
| 42 |                   |     | professional writers                                           |            |
| 43 |                   |     |                                                                |            |
| 44 |                   | 31c | Plans, if any, for granting public access to the full          | 14         |
| 45 |                   |     | protocol, participant-level dataset, and statistical code      |            |
| 46 |                   |     |                                                                |            |
| 47 |                   |     |                                                                |            |
| 48 | <b>Appendices</b> |     |                                                                |            |
| 49 |                   |     |                                                                |            |
| 50 | Informed consent  | 32  | Model consent form and other related documentation             | NA         |
| 51 | materials         |     | given to participants and authorised surrogates                |            |
| 52 |                   |     |                                                                |            |
| 53 | Biological        | 33  | Plans for collection, laboratory evaluation, and storage of    | NA         |
| 54 | specimens         |     | biological specimens for genetic or molecular analysis in      |            |
| 55 |                   |     | the current trial and for future use in ancillary studies, if  |            |
| 56 |                   |     | applicable                                                     |            |
| 57 |                   |     |                                                                |            |

\*It is strongly recommended that this checklist be read in conjunction with the SPIRIT 2013 Explanation & Elaboration for important clarification on the items. Amendments to the



1  
2  
3  
4  
5  
6  
7  
8  
9  
10  
11  
12  
13  
14  
15  
16  
17  
18  
19  
20  
21  
22  
23  
24  
25  
26  
27  
28  
29  
30  
31  
32  
33  
34  
35  
36  
37  
38  
39  
40  
41  
42  
43  
44  
45  
46  
47  
48  
49  
50  
51  
52  
53  
54  
55  
56  
57  
58  
59  
60

protocol should be tracked and dated. The SPIRIT checklist is copyrighted by the SPIRIT Group under the Creative Commons "[Attribution-NonCommercial-NoDerivs 3.0 Unported](#)" license.

For peer review only

# BMJ Open

## Camu Camu effects on microbial translocation and systemic immune activation in ART-treated people living with HIV: protocol of the single-arm non-randomised Camu Camu prebiotic pilot study (CIHR/CTN PT032)

|                                 |                                                                                                                                                                                                                                                                                                                                                                                                                                                                                                                                                                                                                                                                                                                                                                                                                                                                                                                                                                                                                                                                                                                                                                                                                                                                                                                                                                                                                                                                                                                                                                                                                                                                                                                                                                                                                                         |
|---------------------------------|-----------------------------------------------------------------------------------------------------------------------------------------------------------------------------------------------------------------------------------------------------------------------------------------------------------------------------------------------------------------------------------------------------------------------------------------------------------------------------------------------------------------------------------------------------------------------------------------------------------------------------------------------------------------------------------------------------------------------------------------------------------------------------------------------------------------------------------------------------------------------------------------------------------------------------------------------------------------------------------------------------------------------------------------------------------------------------------------------------------------------------------------------------------------------------------------------------------------------------------------------------------------------------------------------------------------------------------------------------------------------------------------------------------------------------------------------------------------------------------------------------------------------------------------------------------------------------------------------------------------------------------------------------------------------------------------------------------------------------------------------------------------------------------------------------------------------------------------|
| Journal:                        | <i>BMJ Open</i>                                                                                                                                                                                                                                                                                                                                                                                                                                                                                                                                                                                                                                                                                                                                                                                                                                                                                                                                                                                                                                                                                                                                                                                                                                                                                                                                                                                                                                                                                                                                                                                                                                                                                                                                                                                                                         |
| Manuscript ID                   | bmjopen-2021-053081.R2                                                                                                                                                                                                                                                                                                                                                                                                                                                                                                                                                                                                                                                                                                                                                                                                                                                                                                                                                                                                                                                                                                                                                                                                                                                                                                                                                                                                                                                                                                                                                                                                                                                                                                                                                                                                                  |
| Article Type:                   | Protocol                                                                                                                                                                                                                                                                                                                                                                                                                                                                                                                                                                                                                                                                                                                                                                                                                                                                                                                                                                                                                                                                                                                                                                                                                                                                                                                                                                                                                                                                                                                                                                                                                                                                                                                                                                                                                                |
| Date Submitted by the Author:   | 06-Dec-2021                                                                                                                                                                                                                                                                                                                                                                                                                                                                                                                                                                                                                                                                                                                                                                                                                                                                                                                                                                                                                                                                                                                                                                                                                                                                                                                                                                                                                                                                                                                                                                                                                                                                                                                                                                                                                             |
| Complete List of Authors:       | Isnard, Stéphane; Research Institute of the McGill University Health Centre; McGill University Health Centre, Department of Medicine Fombuena, Brandon; Research Institute of the McGill University Health Centre; McGill University Health Centre, Department of Medicine Ouyang, Jing; Research Institute of the McGill University Health Centre; McGill University Health Centre, Department of Medicine Royston, Léna; Research Institute of the McGill University Health Centre; McGill University Health Centre, Department of Medicine Lin, John; Research Institute of the McGill University Health Centre; McGill University Health Centre, Department of Medicine Bu, Simeng; Research Institute of the McGill University Health Centre; McGill University Health Centre, Department of Medicine Sheehan, Nancy; McGill University Health Centre, Department of Medicine Lakatos, Péter; McGill University Bessissow, Talat; McGill University Chomont, Nicolas; Centre de recherche du centre hospitalier de l'université de Montréal, Centre de Recherche du CHUM and Department of microbiology, infectiology and immunology, Université de Montréal Klein, Marina; Research Institute of the McGill University Health Centre Lebouché, Bertrand; McGill University Health Centre, Chronic Viral Illness Service, McGill University Health Centre; McGill University, Department of Family Medicine, McGill University Costiniuk, Cecilia T.; McGill University, Chronic Viral Illness Service Routy, Bertrand; Centre Hospitalier de l'Université de Montréal Centre de Recherche Marette, André; McGill University Health Centre, Department of Family Medicine; Laval University Routy, Jean-Pierre; Research Institute of the McGill University Health Centre; McGill University Health Centre, Department of Medicine |
| <b>Primary Subject Heading</b>: | HIV/AIDS                                                                                                                                                                                                                                                                                                                                                                                                                                                                                                                                                                                                                                                                                                                                                                                                                                                                                                                                                                                                                                                                                                                                                                                                                                                                                                                                                                                                                                                                                                                                                                                                                                                                                                                                                                                                                                |
| Secondary Subject Heading:      | Gastroenterology and hepatology, Immunology (including allergy), Infectious diseases, Nutrition and metabolism                                                                                                                                                                                                                                                                                                                                                                                                                                                                                                                                                                                                                                                                                                                                                                                                                                                                                                                                                                                                                                                                                                                                                                                                                                                                                                                                                                                                                                                                                                                                                                                                                                                                                                                          |
| Keywords:                       | HIV & AIDS < INFECTIOUS DISEASES, Inflammatory bowel disease <                                                                                                                                                                                                                                                                                                                                                                                                                                                                                                                                                                                                                                                                                                                                                                                                                                                                                                                                                                                                                                                                                                                                                                                                                                                                                                                                                                                                                                                                                                                                                                                                                                                                                                                                                                          |

1  
2  
3  
4  
5  
6  
7  
8  
9  
10  
11  
12  
13  
14  
15  
16  
17  
18  
19  
20  
21  
22  
23  
24  
25  
26  
27  
28  
29  
30  
31  
32  
33  
34  
35  
36  
37  
38  
39  
40  
41  
42  
43  
44  
45  
46  
47  
48  
49  
50  
51  
52  
53  
54  
55  
56  
57  
58  
59  
60

|  |                                                                      |
|--|----------------------------------------------------------------------|
|  | GASTROENTEROLOGY, Nutritional support < GASTROENTEROLOGY, IMMUNOLOGY |
|  |                                                                      |

SCHOLARONE™  
Manuscripts

1  
2  
3 **Camu Camu effects on microbial translocation and systemic immune activation in ART-**  
4 **treated people living with HIV: protocol of the single-arm non-randomised Camu Camu**  
5 **prebiotic pilot study (CIHR/CTN PT032)**  
6

7  
8 Stéphane Isnard<sup>1,2,3</sup>, Brandon Fombuena<sup>1,2</sup>, Jing Ouyang<sup>1,2,4</sup>, Léna Royston<sup>1,2</sup>, John Lin<sup>1,2</sup>, Simeng  
9 Bu<sup>1,2</sup>, Nancy Sheehan<sup>2</sup>, Peter L. Lakatos<sup>5</sup>, Talat Bessissow<sup>5</sup>, Nicolas Chomont<sup>6</sup>, Marina B.  
10 Klein<sup>1,2</sup>, Bertrand Lebouché<sup>1,2,7,8</sup>, Cecilia T Costiniuk<sup>1,2</sup>, Bertrand Routy<sup>6</sup>, André Marette<sup>8,9</sup>, Jean  
11 Pierre Routy<sup>1,2,11\*</sup>, For the Camu Camu Study Group  
12  
13

14  
15 <sup>1</sup> Infectious Diseases and Immunity in Global Health Program, Research Institute, McGill  
16 University Health Centre, Montréal, QC, Canada,

17 <sup>2</sup> Department of Medicine, Division of Infectious diseases and Chronic Viral Illness Service,  
18 McGill University Health Centre, Montréal, QC, Canada,

19 <sup>3</sup> CIHR Canadian HIV Trials Network, Vancouver, BC, Canada

20 <sup>4</sup> Chongqing Public Health Medical Center, Chongqing, China,

21 <sup>5</sup> Division of Gastroenterology, McGill University Health Center, Montréal, QC, Canada

22 <sup>6</sup> Centre de Recherche du Centre Hospitalier de l'Université de Montréal, Montréal, QC, Canada

23 <sup>7</sup> Centre for Outcomes Research and Evaluation, Research Institute of the McGill University  
24 Health Centre, Montréal, QC, Canada

25 <sup>8</sup> Department of Family Medicine, McGill University Health Centre, Montréal, QC, Canada

26 <sup>8</sup> Institute of Nutrition and Functional Foods, Laval University, Québec City, QC, Canada

27 <sup>9</sup> Department of Medicine, Faculty of Medicine, Cardiology Axis of the Québec Heart and Lung  
28 Institute, Laval University, Québec City, QC, Canada

29 <sup>11</sup> Division of Hematology, McGill University Health Centre, Montréal, QC, Canada  
30  
31  
32  
33  
34  
35  
36  
37

38 **Correspondence:**

39 **Jean-pierre.routy@mcgill.ca**  
40  
41  
42  
43  
44  
45  
46  
47  
48  
49  
50  
51  
52  
53  
54  
55  
56  
57  
58  
59  
60

**ABSTRACT (249 words)****Introduction**

Despite the success of antiretroviral therapy (ART) in transforming HIV disease into a chronic infection, people living with HIV (PLWH) remain at risk for various non-AIDS inflammatory comorbidities. Risk of non-AIDS comorbidities is associated with gut dysbiosis, epithelial gut damage and subsequent microbial translocation, and increased activation of both circulating CD4+ and CD8+ T-cells. Therefore, in addition to ART, novel gut microbiota-modulating therapies could aid in reducing inflammation and immune activation, gut damage, and microbial translocation. Amongst various gut-modulation strategies under investigation, the Amazonian fruit Camu Camu (CC) presents itself as a prebiotic candidate based on its anti-inflammatory and antioxidant properties in animal models and tobacco smokers.

**Method and analysis**

A total of 22 PLWH on ART for more than 2 years, with a viral load <50 copies/mL, a CD4+ count >200 and a CD4+/CD8+ ratio <1 (suggesting increased inflammation and risk for non-AIDS comorbidities), will be recruited in a single arm, non-randomized, interventional pilot trial. We will assess tolerance and effect of supplementation with CC in ART-treated PLWH on reducing gut damage, microbial translocation, inflammation, and HIV latent reservoir by various assays.

**Ethics and dissemination**

The Canadian Institutes of Health Research (CIHR)/Canadian HIV Trials Network (CTN) pilot trial protocol CTNPT032 was approved by the Natural and Non-prescription Health Products Directorate of Health Canada and the research ethics board of the McGill university Health Centre committee (number 2020-5903). Results will be made available as a free access through publications in peer reviewed journals and through the CIHR/CTN website.

**Trial registration number**

ClinicalTrials.gov: NCT04058392

## KEYWORDS

Camu Camu; HIV; Antiretroviral therapy; Prebiotic; Gut microbiota; gut mucosa; Inflammation.

## ARTICLE SUMMARY: STRENGTHS AND LIMITATIONS OF THIS STUDY

- Camu camu (CC) is an Amazonian rainforest fruit which has been shown to have anti-inflammatory and gut microbiota-modulating properties in mice.
- The Camu Camu study seeks to confirm mouse model findings on systemic inflammation and immune activation, gut dysbiosis and damage, and subsequent microbial translocation in antiretroviral therapy (ART)-treated people living with HIV (PLWH).
- We hypothesize that treatment with CC will beneficially impact ART-treated PLWH by improving their gut microbiota composition, reducing microbial translocation, reducing inflammation to potentially decreasing latent HIV reservoir size and the risk to develop non-AIDS comorbidities.
- Changes induced by CC treatment will be assessed by plasma markers of gut damage, microbial translocation, inflammation, percentage of activated T-cells, HIV reservoir size and gut bacterial taxa.
- This pilot trial with 22 ART-treated PLWH, will provide sufficient data for future sample size calculations to confirm the effect of CC in more definitive larger studies.

**Main text (3999 words)****INTRODUCTION****Antiretroviral therapy inhibits viral replication without eradication.**

Antiretroviral therapy (ART) successfully controls Human Immunodeficiency Virus (HIV) infection by inhibiting viral replication and has significantly improved the life expectancy of people living with HIV (PLWH) while eliminating transmission to others. However, ART-treated PLWH remain at risk for developing inflammatory non-AIDS comorbidities such as cardiovascular diseases, fatty liver, neurocognition dysfunction and cancer (1, 2). These non-AIDS comorbidities are associated with persistent immune activation and increase with aging, co-infections like cytomegalovirus (CMV) and viral hepatitis as well as microbial translocation. It has been observed in HIV infection and inflammatory bowel disease that abnormal composition of the gut microbiota called “dysbiosis”, alteration of the gut barrier, T-helper (Th) 17 cell dysfunction and microbial translocation lead to systemic inflammation and immune activation contributing to non-AIDS comorbidities (3-9). Long-term HIV control by ART appears to only partially reduce inflammation and poorly replenishes Th17 protective mucosal function, highlighting the importance of research on gut microbiota and the epithelial barrier. Furthermore, despite control of HIV replication, persistent HIV infection in long-lived memory CD4+ T-cells and likely macrophages also contribute to inflammation and microbial translocation, creating a vicious cycle nurturing inflammation. Importantly, the size of the HIV reservoir has been linked to the level of inflammation and immune activation measured in CD8+ T-cells and macrophages (3, 10). Conversely, it remains unknown whether the reduction of inflammation can lead to a decrease in the size of the HIV reservoir.

**Gut damage and immune activation**

As HIV is not cleared with ART, persistent viral products and inflammation subsequently impair antigen-specific T-cell responses. This overall activation leads to the exhaustion of the immune system, including T-cells. This distinctive feature from other chronic viral infections is relevant as HIV replicates preferentially in Th17 CD4+ T-cells residing in the gut, leading to cell death and mucosa damage (11-13). Microbial products penetrate the damaged gut barrier and pass into the systemic circulation. Such microbial translocation contributes to systemic immune activation,

1  
2  
3 disease progression, and development of non-AIDS comorbidities (14-17). Markers of bacterial  
4 translocation, including lipopolysaccharide (LPS), LPS binding protein (LBP), and soluble CD14  
5 (sCD14) have been correlated with immune activation and disease progression (3, 11, 18, 19).  
6  
7 While bacterial translocation is thought to be a major cause of immune activation, we have shown  
8 that circulating beta-D-glucan (BDG), a marker of fungal translocation, also contributes to the  
9 immune activation in an LPS-independent manner (20, 21).

10  
11  
12  
13 Although ART suppresses HIV replication to undetectable levels, microbial translocation  
14 and Th17 damage remain, contributing to persistent immune activation. Local gut inflammation  
15 has been associated with HIV reservoir size (22). Monocytes/macrophages, Dendritic cells, and  
16 Natural Killer (NK) cells detect microbial products in the mesenteric lymph nodes and in systemic  
17 circulation, secreting pro-inflammatory cytokines (interleukin (IL)-1 $\beta$ , IL-8, tumor necrosis factor  
18 (TNF)- $\alpha$ ). These cytokines drive CD4+ T-cell activation, leading to elevated expression of the  
19 HIV co-receptor C-C Chemokine receptor (CCR) 5 and the gut homing receptor CCR6 (23). Th17  
20 measured by CD4+ T-cells expressing CCR6 have then been shown by our group to be  
21 preferentially infected by HIV (12, 13, 24).

### 30 31 **Gut microbiota, dysbiosis and immune regulation**

32 The gut microbiota composition and metabolites play an important role in inflammation in obesity,  
33 diabetes, cancer, and HIV infection. Its role includes food and metabolite processing, microbial  
34 regulation, and immune regulation (25-28). PLWH, compared to uninfected controls, present with  
35 a dysbiosis characterized by a lower abundance of Firmicutes and more abundant Proteobacteria  
36 in their gut microbiota. In addition lack of *Lactobacilli* in stools is associated with lower CD4+ T-  
37 cell count and a higher levels of systemic immune activation (29). Moreover, lower levels of  
38 *Akkermansia muciniphila* have been observed in PLWH. Dysbiosis combined with microbial  
39 translocation has been linked to non-AIDS comorbidities in HIV-infected individuals and  
40 influences CD4+ T-cell recovery on ART as reported by our group and others (3, 14, 18, 30, 31).

### 48 49 50 ***Akkermansia muciniphila* in health and disease**

51 *Akkermansia muciniphila* (*A. muciniphila*) is a gram-negative, strict anaerobe and mucin-  
52 degrading bacterium that colonizes the gut of humans and rodents. *A. muciniphila* represents 1-  
53 5% of all intestinal bacteria. This bacterium acts as a shield on the gut epithelial barrier and has  
54  
55  
56  
57  
58  
59  
60



1  
2  
3 been shown to reduce insulin resistance in obese individuals (26, 32-36). Lower abundance of *A.*  
4 *muciniphila* has been found in the feces of patients with inflammatory bowel disease (IBD) and  
5 individuals with obesity, when compared to feces of healthy individuals (25, 26). Furthermore,  
6 oral administration of *A. muciniphila* to mice fed a high-fat diet alleviates obesity, reduces LPS in  
7 the circulation and alleviates insulin resistance (26, 37, 38).  
8  
9

10  
11 Additionally, patients with lung and renal cell carcinoma responding to anti-PD-1  
12 treatment were more prone to have an elevated abundance of gut *A. muciniphila* compared to non-  
13 responders (28). To go beyond association, B. Routy *et al.* transferred the microbiota from  
14 responders and non-responders into germ-free mice and observed a tumor response only in mice  
15 with a *A. muciniphila* rich human fecal microbiota from the responders (28). Both *in vitro* and *in*  
16 *vivo*, *A. muciniphila* has been shown to increase mucus secretion by goblet cells and gut epithelium  
17 integrity contributing to the prevention of other bacterial products from passing into the circulation  
18 (35, 38, 39). Moreover, oral administration *A. muciniphila* was shown to successfully elevate key  
19 anti-aging and anticancer metabolites primarily in the gut and liver (40).  
20  
21

22  
23 Based on these encouraging results, different attempts have been made to increase *A.*  
24 *muciniphila* in the gut. Everard *et al.* showed that pasteurized *A. muciniphila* increased mucus  
25 thickness, decreased LPS translocation, and reduced metabolic syndrome in obese mice. In  
26 contrast, heat-killed *A. muciniphila* did not protect mice from obesity (38). However, such  
27 pasteurized strains are costly, difficult to produce and may not last after oral administration.  
28  
29

### 30 31 32 33 34 35 36 37 38 **The Amazonian fruit Camu Camu**

39 Camu Camu (CC), also named *Myriciaria dubia*, is an Amazon rainforest fruit with antioxidant  
40 and anti-inflammatory properties. Anhê *et al.* showed that polyphenol-rich cranberry and CC  
41 extracts protect mice from diet-induced obesity and intestinal inflammation in association with  
42 increased *A. muciniphila* in the gut microbiota (32-35). CC was more efficient at reducing the  
43 amount of LPS in plasma than cranberry extract in the diet-induced model of obesity, and it was  
44 also found to increase other beneficial microbes in addition to *A. muciniphila*. Other studies have  
45 shown that polyphenols could favor *A. muciniphila* in the gut (26, 41, 42). Importantly, CC extracts  
46 also decreased C-Reactive protein (CRP), IL-6 and IL-8 in the plasma of healthy tobacco smokers  
47 (43). CC is considered a “super fruit” which is widely available in many Canadian health food  
48  
49  
50  
51  
52  
53  
54  
55  
56  
57  
58  
59  
60

1  
2  
3 stores in either powder or capsule form. CC products have been used as a nutritional supplement  
4 that is well tolerated in humans (44).  
5

6  
7 CC is a fruit rich in polyphenols and has been shown in mouse model of inflammation-  
8 related diseases to reduce inflammation and improve gut microbiota with increased *A. muciniphila*  
9 and other beneficial bacteria (32-35). However, no studies have been performed to test CC in  
10 PLWH. Moreover, PLWH on ART have been shown to exhibit persistent dysbiosis, an altered gut  
11 microbiota composition, along with microbial translocation which can cause non-AIDS  
12 comorbidities and hamper CD4+ T-cell recovery (3, 14, 18, 30). Therefore, we will evaluate if the  
13 polyphenol rich CC can positively affect PLWH on ART in terms of reducing inflammation,  
14 improving gut microbiota and potentially decreasing HIV persistent reservoir.  
15  
16  
17  
18  
19  
20  
21

## 22 **Objective**

23  
24 To determine the feasibility and suitable design of a full-scale study on the effect of Camu Camu  
25 in ART-treated PLWH, we designed a non-randomized, single arm, interventional study.  
26  
27  
28

## 29 **Primary outcomes**

30  
31 The primary outcome of this study will be to evaluate the effect of CC on the reduction of the  
32 plasma marker of microbial translocation LPS, assessed using ELISA.  
33  
34  
35

## 36 **Secondary outcomes**

37  
38 The secondary outcomes of this study will be changes in the following before and after 12 weeks  
39 of CC intake, and after 8 weeks of CC discontinuation:  
40

- 41 • Safety and tolerability of CC measured by evaluating adverse events, hematology, and  
42 serum chemistries over the course of the study. These evaluations will include HIV viral  
43 load, glucose levels, a lipid profile and plasma levels of hsCRP and D-dimer.  
44
- 45 • Gut barrier integrity markers I-FABP and sST2, measured by ELISA.  
46
- 47 • Microbial translocation marker (1-3)- $\beta$ -D-Glucan (BDG) assessed using the Fungitell  
48 assay.  
49
- 50 • Pro-inflammatory markers (IL-1 $\beta$ , IL-6, IL-8, IL-18, IP-10, IL-17A and F, IL-22, and  
51 soluble CD14) and anti-inflammatory markers (IL-10) assessed by ELISA.  
52  
53  
54  
55  
56  
57  
58  
59  
60

- T-cell and monocyte activation levels assessed by flow cytometry using markers CD38, HLA-DR and PD-1.
- *A. muciniphila* levels in stools using qPCR.
- Microbiota composition and diversity in stools assessed using 16s rDNA sequencing.
- HIV reservoir size in blood assessed by PCR.
- Evaluate intra-patient variability using data from two baseline visits, approximately two weeks apart from each other to confirm reliability of baseline results.

### **Exploratory outcomes**

The exploratory outcomes of this study will be the following:

- Difference in HIV reservoir size from Baseline (Visit 0) to 12 weeks post-CC treatment by TILDA, performed on blood samples.
- Changes in other markers of gut damage (including plasma REG3 $\alpha$  (45)), microbial translocation (such as plasma 16S rDNA) and immune activation (T-cell activation, cytokines) in the blood and gut biopsies.

### **Sub-study outcomes**

The sub-study outcomes will be the following:

- Changes in gut mucosa architecture in a subset of participants who will consent to have colon biopsies before and at the end of the 12 weeks of CC treatment.
- Changes in inflammation in gut mucosa biopsy assessed by myeloperoxidase staining before and at the end of the 12 weeks of CC treatment.
- Changes in HIV reservoir size in biopsies using qPCR.
- Association between baseline gut microbiota composition (16S rDNA sequencing), and markers of gut integrity (I-FABP, tissue staining) and inflammation (T-cell activation, inflammatory cytokines).

## **METHODS AND ANALYSIS**

### **Study design, settings, sample size and recruitment strategy**

Trial CTN PT032 is an open label, non-randomized, single arm interventional pilot study (Clinicaltrials.gov NCT04058392); protocol version # 1.3; February 12, 2021. The study sponsor

1  
2  
3 is the Canadian Institutes of Health Research (CIHR) Canadian HIV Trials Network (CTN). The  
4 following study protocol fulfills the requirements of the 2013 Standard Protocol Items:  
5 Recommendations for Interventional Trials guidelines (46, 47).  
6  
7

8 Comparisons and assessment of outcomes will be made through various measures at  
9 baseline, during and after CC use (**figure 1 and table 1**).  
10

11 A total of 22 ART-treated participants living with HIV will be enrolled at the Chronic Viral  
12 Illness Service (CVIS) at the McGill University Health Centre (MUHC), Glen Site, Montreal, QC  
13 and the Ottawa Hospital, General Campus, Infectious Diseases Clinic, Ottawa, ON, Canada. A  
14 convenient sample size of 22 participants was chosen without formal power calculations for this  
15 pilot study, based on the Lilac study design (48, 49) and the study by Inoue *et al.* (43). This sample  
16 size accounts for an estimated loss to follow-up/non-completion of 10% for the study. It can  
17 therefore be estimated that 2 participants may not fully complete the study. There will be an  
18 optional colon biopsy sub-study. For logistical reasons, only participants recruited at the Montreal  
19 site will be given the option to participate in this sub-study, after giving informed consent to  
20 participate in the main study and being shown to be eligible for the main study (after screening).  
21 The sub-study will have a separate informed consent form. The obtained data from this study will  
22 be used for calculation of sample size for future larger studies.  
23  
24  
25  
26  
27  
28  
29  
30  
31

32 Participants will be recruited at two above-mentioned centers in Canada. Both participating  
33 medical clinics provide care to more than 2000 HIV-infected persons. Teleconferences and face-  
34 to-face meetings will be organized between the Qualified Investigators and study staff to help  
35 promote patient recruitment and follow-up during the study.  
36  
37  
38

39 At screening, a medical history and medication history will be recorded by study staff  
40 through chart review and/or patient interview. Date of diagnosis, date of ART initiation, nadir CD4  
41 count, mode of HIV acquisition and previous AIDS defining illnesses will be recorded. Previous  
42 use of ART drugs and other medication will also be documented.  
43  
44  
45

46 Recruitment started in November 2020 and is expected to end in January 2022.  
47  
48  
49

### 50 **Inclusion criteria**

51 Participants will be eligible for the study if they meet the following criteria: (1) Male or female  
52 adults  $\geq 18$  years of age; (2) Documented HIV-1 infection by Western Blot, Enzyme Immuno  
53 Assay (EIA) or viral load assay; (3) On ART for at least 2 years, and stable ART regimen (same  
54  
55  
56  
57  
58  
59  
60

1  
2  
3 prescription) for at least 3 months to ensure a stabilization of inflammation markers; (4) Persistent  
4 undetectable viral load < 50 copies/ml for the past 2 years. One viral blip are allowed if preceded  
5 and followed by a HIV viremia below 50 copies/ml; (5) CD4+ count >200 and a CD4+/CD8+ ratio  
6 <1, to recruit participants with increased inflammation and risk for non-AIDS comorbidities; (6)  
7 Able to communicate adequately in either French or English; (7) Able and willing to provide  
8 written informed consent prior to screening; (8) As the influence of CC on pregnant women is  
9 unknown, women of childbearing potential must have a negative serum pregnancy test; (9) Women  
10 of childbearing potential must agree to use an approved methods of birth control while in the study  
11 and until 2 weeks after completion of the study; (10) Women of non-child-bearing potential as  
12 defined as either post-menopausal (12 months of spontaneous amenorrhea and  $\geq 45$  years of age)  
13 or physically incapable of becoming pregnant with documented tubal ligation, hysterectomy or  
14 bilateral oophorectomy; (11) Sexually active men with a female partner of childbearing potential  
15 must agree to use an approved methods of birth control.  
16  
17  
18  
19  
20  
21  
22  
23  
24  
25  
26

### 27 **Exclusion criteria**

28  
29 Participants will not be eligible to participate in the study if they meet any of the following  
30 conditions: (1) Known allergy/hypersensitivity to Camu Camu; (2) Current AIDS-related event or  
31 serious health condition including systemic infections in the last 3 months; (3) Severe systemic  
32 diseases (e.g. uncontrolled hypertension, chronic renal failure), or active uncontrolled infections;  
33 (4) Co-infection with active Hepatitis B or C Virus; (5) Current use or have used in the past 3  
34 months: immune-modulatory agents, prophylactic antibiotics(41)/antibiotics, proton pump  
35 inhibitors, or Morphine as these drugs modulate gut microbiota; (6) Current use of aluminum  
36 containing phosphate binders, chemotherapeutics, niacin, anticoagulant and protease inhibitors  
37 (including in their ART-regimen) as increased vitamin-C levels can prevent the activity of those  
38 molecules; (7) Diagnosis of diabetes mellitus ( $HbA1c \geq 6.5\%$ ) as defined by the Canadian Clinical  
39 Practice Guidelines for the Prevention and Management of Diabetes (50); (8) Frequent use of  
40 probiotics or polyphenol-rich prebiotics (e.g. cranberry and CC powders and/or capsules) in the  
41 last 12 months; (9) Recent changes in dietary habits, intermittent fasting, chronic constipation or  
42 laxative use as these can affect gut microbiota; (10) Psychiatric or cognitive disturbance or any  
43 illness that could preclude compliance with the study; (11) Current participation in an experimental  
44 therapy study or receipt of experimental therapy within the last 6 months; (12) Women who are  
45  
46  
47  
48  
49  
50  
51  
52  
53  
54  
55  
56  
57  
58  
59  
60

1  
2  
3 planning to become or who are pregnant, or breast-feeding; (13) A score of higher than 8 on a Full  
4 AUDIT questionnaire at the screening visit, suggesting an alcohol abuse problem.  
5  
6  
7  
8  
9  
10

### 11 **Study intervention**

12 Participants will be instructed to take 1000 mg of Camu C™ (provided by Natural Traditions,  
13 Canada) once daily administered as two 500 mg oral capsules for 12 weeks. Capsules will be taken  
14 at the same time each day with a meal, preferentially breakfast. Camu C™ can be taken with ART  
15 as no interactions are expected. The 1000 mg dose is based on the dose given to mice per mean  
16 body weight divided by 12.3 as per the Food and Drug Administration (FDA) equation to  
17 determine equivalent dosing in human vs. mice, and consistent with Health Canada's  
18 recommendations of 1-3 capsules daily (51, 52).  
19  
20  
21  
22  
23  
24

25 The interaction between CC and other medication is unknown. CC has a high vitamin C  
26 concentration and therefore any drug with negative interactions with vitamin C were included in  
27 the exclusion criteria. The vitamin C in CC could interact with aluminum in phosphate binders  
28 (possible harmful to kidneys); chemotherapeutics (CC antioxidative properties could reduce the  
29 chemotherapeutic drug's effect); protease inhibitors (vitamin C might reduce the effect of antiviral  
30 drugs containing protease inhibitors); niacins (vitamin C could reduce niacin's effect); and  
31 anticoagulants since high doses of vitamin C can reduce responses to some anticoagulants. Hence,  
32 participants will be asked to refrain from using Vitamin C supplements during the study.  
33  
34  
35  
36  
37  
38

39 Use of street drugs, cigarette smoking, non-prescription medications, and  
40 marijuana/cannabis products use will be recorded in questionnaires by a research staff at each visit.  
41 Study continuation will be based on the Investigator's judgement. In the 24 hours prior to a study  
42 visit participants will be instructed to refrain from using marijuana/cannabis products and limit  
43 alcohol to no more than one alcoholic beverage with dinner the night before the study visit as they  
44 could influence inflammation markers in blood and gut microbiota in stools.  
45  
46  
47  
48  
49  
50

### 51 **Adverse events and toxicity management**

52 During each follow-up visit with the participant, information on adverse events (AEs) will be  
53 gathered and documented accordingly. AEs will be graded as mild, moderate, severe, or life-  
54  
55  
56  
57  
58  
59

1  
2  
3 threatening and assessed by causality as probably related, possibly related, unlikely to be related  
4 or not related to Camu C<sup>TM</sup>. Stable chronic conditions which are present prior to clinical trial entry  
5 and do not worsen are not considered AEs and will be accounted for in the participant's medical  
6 history.  
7  
8  
9

10 Risk minimization, management, and assessment procedures have been implemented in  
11 the study to minimize and assess potential risks to participants who participate in this clinical study  
12 with Camu C<sup>TM</sup>. Components include specific study entry and exclusion criteria to ensure that  
13 participants who have underlying characteristics that potentially increase their risk for an adverse  
14 outcome are excluded; monitoring for adverse events for the duration of the study; overview  
15 surveillance by an Independent Data Safety Monitoring Committee (DSMC); risk identification  
16 and mitigation management over the course of the study (and the sub-study).  
17  
18  
19  
20  
21

22 When side effects are perceived to be related to Camu C<sup>TM</sup>, the Investigator can use their  
23 clinical judgment regarding whether to continue or to discontinue the study medication. If Camu  
24 C<sup>TM</sup> treatment is discontinued, the participant will be scheduled for follow-up visit(s) as required  
25 to treat the symptoms or adverse event related to Camu C<sup>TM</sup> intake.  
26  
27  
28  
29  
30

### 31 **Clinical and laboratory assessments**

#### 32 Assessment of gut damage, microbial translocation, and inflammation

33 To evaluate gut epithelial damage, we and others have validated markers that will be  
34 measured in the plasma by ELISA before, during and after CC intake (11, 53-55). LPS, a common  
35 marker of bacterial translocation (56), soluble Suppression of Tumorigenicity (sST2)(20) and  
36 Intestinal-Fatty Acid Binding Protein (I-FABP) will be measured to assess gut barrier integrity.  
37 Immune activation markers (sCD14) and pro-(IL-1 $\beta$ , IL-6, IL-8, TNF- $\alpha$ ) and anti-inflammatory  
38 (IL-10) cytokines will be quantified (57, 58). Activation of monocytes and CD4<sup>+</sup> and CD8<sup>+</sup> T-  
39 cells will be assessed *ex vivo* by flow cytometry with HLA-DR and CD38 staining. CD4<sup>+</sup> and  
40 CD8<sup>+</sup> T-cells will also be assessed for PD-1 expression as a marker of T-cell exhaustion. Plasma  
41 will be assayed for beta D-glucan as a marker of fungal infection(21, 58). REG3 $\alpha$  and 16S rDNA  
42 as well as other markers of microbial translocation and gut damage may be tested in plasma as  
43 well (45).  
44  
45  
46  
47  
48  
49  
50  
51  
52  
53  
54  
55  
56  
57  
58  
59  
60

### Assessment of microbiota composition

qPCR for *A. muciniphila* will be performed on fecal DNA samples as previously described by our group (48). Gut microbiota composition will be further studied by 16S and 18S rDNA sequencing to determine the impact on other beneficial microbes (e.g., *Barnesiella* and *Turicibacter*) known to respond to CC in the obesity mouse model (48).

### Assessment of HIV reservoir size

If differences in microbial translocation and/or inflammation are observed, HIV reservoirs will be quantified in blood and rectal biopsies. HIV DNA (total and integrated) and cell-associated HIV RNA (gag) will be measured in DNA and RNA obtained from isolated CD4+ T-cells from the blood (obtained by negative magnetic selection) and gut biopsies (sorted by flow cytometry). HIV DNA and cell-associated RNA measures will be performed using an ultrasensitive nested qPCR as described previously (59).

In addition, the frequency of cells with inducible proviruses will be measured in isolated CD4+ T-cells from PBMCs using the Tat/rev Induced Limiting Dilution Assay (TILDA) in the laboratory of Dr. Chomont at Baseline Week 0 and End-treatment Week 12 timepoints.

In mucosal biopsies, HIV DNA and RNA will also be quantified and localized by DNA/RNAscope (24, 60).

### Assessment of gut mucosa architecture (optional colon biopsy/sub-study)

Biopsies will be included in paraffin at the MUHC Histopathology core facility. Gut architecture will be monitored by immunochemistry and immunostaining of the epithelial tight junctions (Claudin-3/Occludin)(56). If a diminution in inflammation is noted, myeloperoxidase staining will be performed to allow for the quantification of inflammatory myeloid cells in the gut.

For other analyses, gut cells will be separated from tissues by enzyme digestion using a collagenase-based method as reported previously (61, 62). Briefly, fresh tissue biopsies will be incubated with type II collagenase for 30 minutes at 37°C in a shaking incubator. The resulting lymphocyte suspension will be stained with monoclonal Antibodies (mAbs) against CD3+, CD4+, CD8+, and myeloid markers. The total frequency of activated CD4+ and CD8+ T-cells will be determined by flow cytometry as described above.

### **Statistical analysis**



To examine the change in plasma LPS and soluble CD14 levels relative to baseline, linear mixed effects regression will be used. Time will be considered as a categorical variable in the model to allow flexible modeling of the time trend. All five measurements (two for baseline and three for follow-up visits) will be included as outcome variable in the model. Log transformation of the outcome variable or generalized mixed effects regression will be employed if normality assumption is not satisfied. Changes in plasma markers, percentage of activated T-cells, HIV reservoir size and bacterial taxa by type in the stools samples relative to baselines will be assessed in the same fashion. Demographics including age, sex, sexual practice and HIV history data will be included in multivariable analyses as they have been shown to influence microbiota composition and immune activation in ART-treated PLWH (29, 63).

### **Patient and public involvement**

- Initial design of the study was presented to community groups.
- Compliance questionnaires completed by participants throughout the study will allow for an assessment of their respective experiences.
- Results generated by the study are expected to be published in both formal scientific and lay language; however, will not be directly disseminated to study participants.

### **ETHICS AND DISSEMINATION PLAN**

All participants will be given detailed oral and written information about the study. Consent documents describing in detail the study medication and interventions, study procedures and risks will be given to each participant and written documentation of informed consent is required prior to starting study medication/intervention. Participants must sign an informed consent document that has been approved by a participating center's research ethics board (REB) prior to any procedures being done specifically for the trial. All potential protocol amendments will be submitted to Health Canada and the respective research ethics board of the participating centers. Protocol deviations must first receive ethics approval and be reported to the data safety and monitoring committee of the CTN by the Investigator. The sole exception is when the suggested change intends to eliminate an immediate hazard to study participants.

### **Dissemination plan**

1  
2  
3 The results of the trial will be disseminated through the traditional routes of scientific peer-  
4 reviewed publications, through international and national specialist conferences and through the  
5 press release by CTN. An open access journal will be chosen to ensure access to study results to  
6 all. Locally, results from the study will be shared with the McGill community. Study results will  
7 be submitted for publication in the Montréal LGBTQ+ Community journal *Fugues*. Moreover,  
8 both the Sponsor-Investigator and Qualified Investigator will promote the Camu Camu study when  
9 attending or presenting at local, national, and international meetings.  
10  
11  
12  
13  
14  
15

## 16 17 **CONCLUSION**

18  
19 We hypothesize that treatment with CC will beneficially impact ART-treated PLWH by improving  
20 the gut microbiota composition, reducing systemic inflammation and immune action, reducing gut  
21 damage and microbial translocation, and potentially decreasing latent HIV reservoir size, thus  
22 decreasing the risk in developing non-AIDS comorbidities. This pilot trial with 22 ART-treated  
23 PLWH will provide sufficient data for future sample size calculations and set the foundation to  
24 assess the impact of CC in larger definitive studies.  
25  
26  
27  
28  
29  
30  
31  
32  
33  
34  
35  
36  
37  
38  
39  
40  
41  
42  
43  
44  
45  
46  
47  
48  
49  
50  
51  
52  
53  
54  
55  
56  
57  
58  
59  
60

## Acknowledgments

The authors would like to thank Angie Massicotte, Josee Girouard, Hansi Peiris, Cynthia Dion and Cezar Iovi for their help with coordination. The authors are grateful to members of the CIHR/CTN who's insights paramount in the development of the protocol: Dr Judy Needham, Dr Joanne McBane, as well as Dana Nohynek for her help with regulatory affairs. The authors thank William Chau for building the study database.

## Author statement

Group Authorship/Collaborating Author Names: SI, BF, JO, JL, LR, SB, NS, PLL, TB, NS, MBK, BL, CTC, BR, AM, and JPR, for the Camu Camu Study Group

Contributors: J-PR and SI designed the study, with insights from JO, LR, JL, NS, NC, BR, and AM. BF and SI wrote the manuscript. JL, LR, SB, PLL, TB, NC, MBK, BL, CTC, BR, AM, will participate in data collection and analysis. All authors critically reviewed the manuscript and approved the final version.

## Funding

This study was funded by the Canadian Institutes of Health Research (CIHR) Canadian HIV trials Network (CTN) (CTN PT032 grant to SI and JPR), and by the Canadian HIV Cure Enterprise (CanCURE) (Team Grant HB-164064 to JPR). Authors who are CTN and/or CanCURE members were involved in the study design and in the writing of the manuscript, and will also be involved in data collection, analysis, and interpretation.

## Conflicts of interest

J-PR has performed contract research and/or served on Advisory Boards for Gilead Sciences Canada, Merck Canada, Abbvie, ViiV Healthcare, Bristol Myers Squibb, Janssen, Argos Pharmaceuticals from InnaVirVax and has served on the Advisory Board of Theravectys. JBA has performed contract research and/or served on Advisory Boards for Gilead Sciences Canada, Merck Canada, Abbvie, ViiV Healthcare, Bristol Myers Squibb, Janssen and Argos Pharmaceuticals. NC has received research funding from EMD Serono and has served on the Advisory Board of Gilead Sciences Canada. SI is a post-doctoral fellow from the Fonds de recherche du Quebec en santé,

1  
2  
3 and from the CIHR/CTN. B.L. is supported by a career award LE 250 from Quebec's Ministry of  
4 Health for researchers in family medicine. B.L. has received consultancy fees and/or honoraria  
5 from Gilead, Merck, and ViiV, and research funds from Gilead, Merck, and ViiV, support to attend  
6 educational conferences from ViiV Healthcare and Gilead. L.R. is a post-doctoral fellow supported  
7 by the Swiss National Science Foundation.  
8  
9  
10  
11  
12

### 13 **Patient consent for publication**

14 Not required  
15  
16  
17

### 18 **Ethics approval**

19 Canadian Institutes of Health Research/Canadian HIV Trials Network (CTN) pilot trial protocol  
20 CTNPT032. The study was approved by the Natural and Non-prescription Health Products  
21 Directorate of health Canada and the research ethics board of the McGill university Health Centre  
22 committee (number 2020-5903) and will be conducted in accordance with the Declaration of  
23 Helsinki of 1975, as revised in 2000.  
24  
25  
26  
27  
28  
29

### 30 **Data access statement**

31 The data generated by this study will be available from Dr Routy upon reasonable request after  
32 publication.  
33  
34  
35  
36  
37  
38  
39  
40  
41  
42  
43  
44  
45  
46  
47  
48  
49  
50  
51  
52  
53  
54  
55  
56  
57  
58  
59  
60

**Table 1: Schedule of Events.**

| Visit Type                                                                                | Screening      | Study Visits            |                |                        |                   |                         |
|-------------------------------------------------------------------------------------------|----------------|-------------------------|----------------|------------------------|-------------------|-------------------------|
|                                                                                           |                | Baseline 1              | Baseline 2     | Treatment              |                   | Follow-up               |
| Visit Window                                                                              | -8 to -1 weeks | Week -2 ( $\pm 7$ days) | Week 0 (Day 0) | Week 4 ( $\pm 7$ days) | Week 12 (+7 days) | Week 20 ( $\pm 7$ days) |
| <b>Procedures:</b>                                                                        |                |                         |                |                        |                   |                         |
| Visit No.                                                                                 | 1              | 2                       | 3              | 4                      | 5                 | 6                       |
| Informed Consent                                                                          | X              | X                       |                |                        |                   |                         |
| Eligibility Assessment                                                                    | X              | X                       | X              |                        |                   |                         |
| Concomitant Medication                                                                    | X              | X                       | X              | X                      | X                 | X                       |
| Medical History                                                                           | X              |                         |                |                        |                   |                         |
| Complete Physical Exam and Vital Signs                                                    | X              |                         |                |                        |                   |                         |
| Targeted Physical Exam and Vital Signs                                                    |                | X                       | X              | X                      | X                 | X                       |
| Adverse Event Assessment                                                                  |                |                         |                | X                      | X                 | X                       |
| Serum Pregnancy Test                                                                      | X              | X                       | X              | X                      | X                 | X                       |
| Hematology*                                                                               | X              | X <sup>†</sup>          | X              | X                      | X                 | X                       |
| Serum Chemistry**                                                                         | X              | X <sup>†</sup>          | X              | X                      | X                 | X                       |
| Serology***                                                                               | X              |                         | X              |                        |                   |                         |
| HIV-1 Viral Load****                                                                      | X              | X <sup>†</sup>          | X              | X                      | X                 | X                       |
| Immune activation markers/cytokines (ELISA)*****                                          |                | X                       | X              | X                      | X                 | X                       |
| Monocyte and T-cell activation markers <sup>†</sup>                                       |                | X                       | X              | X                      | X                 | X                       |
| Markers of gut barrier integrity, inflammation, and microbial translocation <sup>††</sup> |                | X                       | X              | X                      | X                 | X                       |
| Size of HIV reservoir in Latently Infected CD4 <sup>+</sup> T-cells <sup>†††</sup>        |                | X                       | X              | X                      | X                 | X                       |
| Stool sample collection and microbiota composition <sup>††††</sup>                        |                | X                       | X              | X                      | X                 | X                       |
| Alcohol use questionnaire (AUDIT-Full)                                                    | X              |                         |                |                        |                   |                         |
| Alcohol use questionnaire (AUDIT-C)                                                       |                | X                       | X              | X                      | X                 | X                       |
| Study Product Dispensation                                                                |                |                         | X              |                        |                   |                         |
| Study Product Compliance                                                                  |                |                         |                | X                      | X                 |                         |
| Colon mucosal biopsies <sup>#</sup>                                                       |                |                         | X              |                        | X                 |                         |

1  
2  
3 \*CBC, CD4 and CD8 T-cell counts, erythrocyte sedimentation rate (ESR).

4 \*\*Alkaline phosphatase, ALT, Amylase, AST, Bilirubin (total), Creatine kinase, Creatinine, D-dimer, fasting blood  
5 glucose, HbA1c, high sensitivity C-reactive protein (hsCRP), Lipase, lipid profile (total cholesterol, high density  
6 lipoprotein (HDL), low density lipoprotein (LDL), Triglycerides), serum phosphate, Urea

7 \*\*\*Serology measurements include: Cytomegalovirus (CMV), Hepatitis B virus (HBV), HCV and HIV viral load.  
8 Since HIV viral load will be measured at each visit, it was put as a separate line item.

9 \*\*\*\*Immune activation markers/cytokines include soluble CD14, pro-inflammatory cytokines (IL-1 $\beta$ , IL-6, IL-8,  
10 TNF- $\alpha$ ) and anti-inflammatory cytokine IL-10. Measured in plasma by ELISA.

11 +Monocyte and T-cell activation markers include HLA-DR and CD38. T-cell exhaustion marker: PD-1. Measured  
12 by staining and flow cytometry.

13 ++Markers of gut barrier integrity, microbial translocation, and inflammation: lipopolysaccharide, soluble ST2, I-  
14 FABP (measured in plasma by ELISA).

15 +++PBMCs will be isolated and then latent CD4 T-cells will be isolated by flow cytometry. HIV viral reservoir in  
16 the latent CD4 T-cell population will be measured by nested qPCR. More specific TILDA analysis will be  
17 performed on Baseline Week 0 and End-treatment Week 12 samples to assess the HIV viral reservoir (Exploratory  
18 analysis).

19 ++++qPCR of *A. muciniphila*, 16S and 18S rDNA sequencing for other members of the microbiota.

20 #Optional sub-study procedure.

21 † Not required when the same tests have been performed at the screening visit within the past 14 days, with the  
22 exception of CBC, CD4, CD8 (and serum pregnancy test)

## References

1. Srinivasa S, Grinspoon SK. Metabolic and body composition effects of newer antiretrovirals in HIV-infected patients. *Eur J Endocrinol* 2014;170:R185-202.
2. Deeks SG, Lewin SR, Havlir DV. The end of AIDS: HIV infection as a chronic disease. *Lancet* 2013;382:1525-33.
3. Brenchley JM, Price DA, Schacker TW, et al. Microbial translocation is a cause of systemic immune activation in chronic HIV infection. *Nat Med* 2006;12:1365-71.
4. Douek DC. Immune activation, HIV persistence, and the cure. *Top Antivir Med* 2013;21:128-32.
5. Monnig MA, Kahler CW, Cioe PA, et al. Markers of Microbial Translocation and Immune Activation Predict Cognitive Processing Speed in Heavy-Drinking Men Living with HIV. *Microorganisms* 2017;5.
6. Neff CP, Krueger O, Xiong K, et al. Fecal Microbiota Composition Drives Immune Activation in HIV-infected Individuals. *EBioMedicine* 2018;30:192-202.
7. Sui Y, Dzutsev A, Venzon D, et al. Influence of gut microbiome on mucosal immune activation and SHIV viral transmission in naive macaques. *Mucosal Immunol* 2018;11:1219-29.
8. Vazquez-Castellanos JF, Serrano-Villar S, Latorre A, et al. Altered metabolism of gut microbiota contributes to chronic immune activation in HIV-infected individuals. *Mucosal Immunol* 2015;8:760-72.
9. Zevin AS, McKinnon L, Burgener A, et al. Microbial translocation and microbiome dysbiosis in HIV-associated immune activation. *Curr Opin HIV AIDS* 2016;11:182-90.
10. Clayton KL, Garcia JV, Clements JE, et al. HIV Infection of Macrophages: Implications for Pathogenesis and Cure. *Pathog Immun* 2017;2:179-92.
11. Mehraj V, Jenabian MA, Ponte R, et al. The plasma levels of soluble ST2 as a marker of gut mucosal damage in early HIV infection. *AIDS* 2016;30:1617-27.
12. Gosselin A, Monteiro P, Chomont N, et al. Peripheral blood CCR4+CCR6+ and CXCR3+CCR6+CD4+ T cells are highly permissive to HIV-1 infection. *J Immunol* 2010;184:1604-16.
13. Gosselin A, Wiche Salinas TR, Planas D, et al. HIV persists in CCR6+CD4+ T cells from colon and blood during antiretroviral therapy. *AIDS* 2017;31:35-48.
14. Tincati C, Douek DC, Marchetti G. Gut barrier structure, mucosal immunity and intestinal microbiota in the pathogenesis and treatment of HIV infection. *AIDS Res Ther* 2016;13:19.
15. Deeks SG, Phillips AN. HIV infection, antiretroviral treatment, ageing, and non-AIDS related morbidity. *BMJ* 2009;338:a3172.
16. Gandhi RT, McMahon DK, Bosch RJ, et al. Levels of HIV-1 persistence on antiretroviral therapy are not associated with markers of inflammation or activation. *PLoS Pathog* 2017;13:e1006285.
17. Hoenigl M, Moser CB, Funderburg N, et al. Soluble Urokinase Plasminogen Activator Receptor Is Predictive of Non-AIDS Events During Antiretroviral Therapy-mediated Viral Suppression. *Clin Infect Dis* 2019;69:676-86.
18. Marchetti G, Tincati C, Silvestri G. Microbial translocation in the pathogenesis of HIV infection and AIDS. *Clin Microbiol Rev* 2013;26:2-18.
19. Sandler NG, Douek DC. Microbial translocation in HIV infection: causes, consequences and treatment opportunities. *Nat Rev Microbiol* 2012;10:655-66.

- 1
- 2
- 3
- 4 20. Mehraj V, Ramendra R, Isnard S, et al. (1-3)-Beta-D-Glucan antigenemia contributes to 1
- 5 immune activation during HIV infection. *Clin Infect Dis* 2018:Submitted.
- 6 21. Isnard S, Lin J, Simeng B, et al. Gut Leakage of fungal-related products: Turning up the
- 7 heat for HIV infection *Front Immunol* 2021.
- 8 22. Peng X, Isnard S, Lin J, et al. Differences in HIV burden in the inflamed and non-inflamed
- 9 colon from a person living with HIV and ulcerative colitis. *J Virus Erad* 2021;7:100033.
- 10 23. Stevenson M, Stanwick TL, Dempsey MP, et al. HIV-1 replication is controlled at the level
- 11 of T cell activation and proviral integration. *EMBO J* 1990;9:1551-60.
- 12 24. Chomont N, El-Far M, Ancuta P, et al. HIV reservoir size and persistence are driven by T
- 13 cell survival and homeostatic proliferation. *Nat Med* 2009;15:893-900.
- 14 25. Anhe FF, Varin TV, Le Barz M, et al. Gut Microbiota Dysbiosis in Obesity-Linked Metabolic
- 15 Diseases and Prebiotic Potential of Polyphenol-Rich Extracts. *Curr Obes Rep* 2015;4:389-400.
- 16 26. Dao MC, Everard A, Aron-Wisnewsky J, et al. Akkermansia muciniphila and improved
- 17 metabolic health during a dietary intervention in obesity: relationship with gut microbiome
- 18 richness and ecology. *Gut* 2016;65:426-36.
- 19 27. Sepich-Poore GD, Zitvogel L, Straussman R, et al. The microbiome and human cancer.
- 20 *Science* 2021;371.
- 21 28. Routy B, Le Chatelier E, Derosa L, et al. Gut microbiome influences efficacy of PD-1-based
- 22 immunotherapy against epithelial tumors. *Science* 2018;359:91-7.
- 23 29. Vujkovic-Cvijin I, Somsouk M. HIV and the Gut Microbiota: Composition, Consequences,
- 24 and Avenues for Amelioration. *Curr HIV/AIDS Rep* 2019;16:204-13.
- 25 30. Lu W, Feng Y, Jing F, et al. Association Between Gut Microbiota and CD4 Recovery in HIV-1
- 26 Infected Patients. *Front Microbiol* 2018;9:1451.
- 27 31. Vujkovic-Cvijin I, Sortino O, Verheij E, et al. HIV-associated gut dysbiosis is independent of
- 28 sexual practice and correlates with noncommunicable diseases. *Nat Commun* 2020;11:2448.
- 29 32. Anhe FF, Roy D, Pilon G, et al. A polyphenol-rich cranberry extract protects from diet-
- 30 induced obesity, insulin resistance and intestinal inflammation in association with increased
- 31 Akkermansia spp. population in the gut microbiota of mice. *Gut* 2015;64:872-83.
- 32 33. Anhe FF, Nachbar RT, Varin TV, et al. Treatment with camu camu (*Myrciaria dubia*)
- 33 prevents obesity by altering the gut microbiota and increasing energy expenditure in diet-
- 34 induced obese mice. *Gut* 2018.
- 35 34. Anhe FF, Nachbar RT, Varin TV, et al. A polyphenol-rich cranberry extract reverses insulin
- 36 resistance and hepatic steatosis independently of body weight loss. *Mol Metab* 2017;6:1563-73.
- 37 35. Anhe FF, Pilon G, Roy D, et al. Triggering Akkermansia with dietary polyphenols: A new
- 38 weapon to combat the metabolic syndrome? *Gut Microbes* 2016;7:146-53.
- 39 36. Ouyang J, Lin J, Isnard S, et al. The Bacterium Akkermansia muciniphila: A Sentinel for Gut
- 40 Permeability and Its Relevance to HIV-Related Inflammation. *Front Immunol* 2020;11:645.
- 41 37. Cani PD. Human gut microbiome: hopes, threats and promises. *Gut* 2018;67:1716-25.
- 42 38. Everard A, Belzer C, Geurts L, et al. Cross-talk between Akkermansia muciniphila and
- 43 intestinal epithelium controls diet-induced obesity. *Proc Natl Acad Sci U S A* 2013;110:9066-71.
- 44 39. Reunanen J, Kainulainen V, Huuskonen L, et al. Akkermansia muciniphila Adheres to
- 45 Enterocytes and Strengthens the Integrity of the Epithelial Cell Layer. *Appl Environ Microbiol*
- 46 2015;81:3655-62.
- 47
- 48
- 49
- 50
- 51
- 52
- 53
- 54
- 55
- 56
- 57
- 58
- 59
- 60



- 1
- 2
- 3
- 4 40. Grajeda-Iglesias C, Durand S, Daillère R, et al. Oral administration of Akkermansia
- 5 muciniphila elevates systemic antiaging and anticancer metabolites. *Aging (Albany NY)*
- 6 2021;13:6375-405.
- 7 41. Etxeberria U, Arias N, Boque N, et al. Reshaping faecal gut microbiota composition by the
- 8 intake of trans-resveratrol and quercetin in high-fat sucrose diet-fed rats. *J Nutr Biochem*
- 9 2015;26:651-60.
- 10 42. Li Z, Henning SM, Lee RP, et al. Pomegranate extract induces ellagitannin metabolite
- 11 formation and changes stool microbiota in healthy volunteers. *Food Funct* 2015;6:2487-95.
- 12 43. Inoue T, Komoda H, Uchida T, et al. Tropical fruit camu-camu (*Myrciaria dubia*) has anti-
- 13 oxidative and anti-inflammatory properties. *J Cardiol* 2008;52:127-32.
- 14 44. Langley PC, Pergolizzi JV, Jr., Taylor R, Jr., et al. Antioxidant and associated capacities of
- 15 Camu camu (*Myrciaria dubia*): a systematic review. *J Altern Complement Med* 2015;21:8-14.
- 16 45. Isnard S, Ramendra R, Dupuy FP, et al. Plasma Levels of C-Type Lectin REG3alpha and Gut
- 17 Damage in People With Human Immunodeficiency Virus. *J Infect Dis* 2020;221:110-21.
- 18 46. Chan A-W, Tetzlaff JM, Gøtzsche PC, et al. SPIRIT 2013 explanation and elaboration:
- 19 guidance for protocols of clinical trials. *BMJ : British Medical Journal* 2013;346:e7586.
- 20 47. SPIRIT 2013 Statement: Defining Standard Protocol Items for Clinical Trials. *Annals of*
- 21 *Internal Medicine* 2013;158:200-7.
- 22 48. Isnard S, Lin J, Fombuena B, et al. Repurposing Metformin in Nondiabetic People With
- 23 HIV: Influence on Weight and Gut Microbiota. *Open Forum Infect Dis* 2020;7:ofaa338.
- 24 49. Routy JP, Isnard S, Mehraj V, et al. Effect of metformin on the size of the HIV reservoir in
- 25 non-diabetic ART-treated individuals: single-arm non-randomised Lilac pilot study protocol. *BMJ*
- 26 *Open* 2019;9:e028444.
- 27 50. Committee CDACPE. Diabetes Canada 2018: Clinical Practice Guidelines for the
- 28 Prevention and Management of Diabetes in Canada. *Canadian Journal of Diabetes* 2018;42:S1-
- 29 S325.
- 30 51. Canada H. Camu C 2018 [05 Dec 2018]. Available from: [https://health-](https://health-products.canada.ca/lnhpd-bdpsnh/info.do?licence=80042046)
- 31 [products.canada.ca/lnhpd-bdpsnh/info.do?licence=80042046](https://health-products.canada.ca/lnhpd-bdpsnh/info.do?licence=80042046).
- 32 52. Nair AB, Jacob S. A simple practice guide for dose conversion between animals and
- 33 human. *J Basic Clin Pharm* 2016;7:27-31.
- 34 53. Mehraj V, Ramendra R, Isnard S, et al. Circulating (1->3)-beta-D-Glucan is associated with
- 35 immune activation during HIV infection. *Clin Infect Dis* 2019.
- 36 54. Ramendra R, Isnard S, Mehraj V, et al. Circulating LPS and (1->3)-b-D-Glucan: A folie à
- 37 deux contributing to HIV-associated immune activation. *Frontiers in Immunology* 2019.
- 38 55. Younas M, Psomas C, Mehraj V, et al. Plasma Level of Soluble ST2 in Chronically Infected
- 39 HIV-1 Patients with Suppressed Viremia. *Open AIDS J* 2017;11:32-5.
- 40 56. Ortiz AM, Flynn JK, DiNapoli SR, et al. Experimental microbial dysbiosis does not promote
- 41 disease progression in SIV-infected macaques. *Nat Med* 2018;24:1313-6.
- 42 57. Mehraj V, Ramendra R, Isnard S, et al. CXCL13 as a Biomarker of Immune Activation During
- 43 Early and Chronic HIV Infection. *Front Immunol* 2019;10:289.
- 44 58. Mehraj V, Ramendra R, Isnard S, et al. Circulating (1->3)-beta-D-glucan Is Associated With
- 45 Immune Activation During Human Immunodeficiency Virus Infection. *Clin Infect Dis* 2020;70:232-
- 46 41.
- 47
- 48
- 49
- 50
- 51
- 52
- 53
- 54
- 55
- 56
- 57
- 58
- 59
- 60

- 1  
2  
3 59. Vandergeeten C, Fromentin R, Merlini E, et al. Cross-clade ultrasensitive PCR-based assays  
4 to measure HIV persistence in large-cohort studies. *J Virol* 2014;88:12385-96.  
5  
6 60. Procopio FA, Fromentin R, Kulpa DA, et al. A Novel Assay to Measure the Magnitude of  
7 the Inducible Viral Reservoir in HIV-infected Individuals. *EBioMedicine* 2015;2:874-83.  
8  
9 61. Shacklett BL, Critchfield JW, Ferre AL, et al. Mucosal T-cell responses to HIV: responding  
10 at the front lines. *J Intern Med* 2009;265:58-66.  
11  
12 62. Planas D, Pagliuzza A, Ponte R, et al. LILAC pilot study: Effects of metformin on mTOR  
13 activation and HIV reservoir persistence during antiretroviral therapy. *EBioMedicine*  
14 2021;65:103270.  
15  
16 63. Vujkovic-Cvijin I, Sortino O, Verheij E, et al. Colonic microbiota is altered in treated HIV  
17 infection independently of sexual practice and correlates with HIV disease progression.  
18 *International Workshop on Microbiome in HIV* 2019;Abstract 14.  
19  
20  
21  
22

### 23 Figure legend

#### 24 **Figure 1:** Study flow chart.

25  
26  
27 Visit 1, the Screening visit, will take place 1-8 weeks prior to the second Baseline visit (Week 0,  
28 Visit 3). At the Screening visit the informed consent document will be explained to the  
29 participant and will be signed prior to any screening and study activities. Two Baseline visits will  
30 be conducted, the second one being at Week 0 and all visits after that will be relative to this  
31 Baseline Week 0 Visit (Visit 3, Day 0). Data collected at these two Baseline visits will be  
32 directly compared to determine intra-patient variability. Camu Camu treatment will be a single  
33 daily dose of 1000 mg (2\*500 mg Camu C<sup>TM</sup> capsules) taken with a meal, at the same time each  
34 day for 12 weeks. Treatment and post-treatment visit dates (Visit 4, Week 4 and Visit 6, Week  
35 20) can vary  $\pm$  7 days according to participant and/or research team availability. Visit 5 at Week  
36 12 can vary +7 days to ensure the participant has completed 12 weeks of Camu Camu treatment  
37 prior to the end-of-treatment visit. See Section 8 Schedule of Events (Table 1) to see more test  
38 details.  
39  
40  
41  
42

43 \*The consent form for the optional gut biopsy will also be explained, but consent for this will not  
44 be necessary to be part of the main study. The sub-study is only available to participants at the  
45 Montreal site.  
46

47 #Optional gut biopsies will be taken for the sub-study at indicated time points.  
48  
49  
50  
51  
52  
53  
54  
55  
56  
57  
58  
59



Figure 1: Study flow chart.

Visit 1, the Screening visit, will take place 1-8 weeks prior to the second Baseline visit (Week 0, Visit 3). At the Screening visit the informed consent document will be explained to the participant and will be signed prior to any screening and study activities. Two Baseline visits will be conducted, the second one being at Week 0 and all visits after that will be relative to this Baseline Week 0 Visit (Visit 3, Day 0). Data collected at these two Baseline visits will be directly compared to determine intra-patient variability. Camu Camu treatment will be a single daily dose of 1000 mg (2\*500 mg Camu CTM capsules) taken with a meal, at the same time each day for 12 weeks. Treatment and post-treatment visit dates (Visit 4, Week 4 and Visit 6, Week 20) can vary  $\pm$  7 days according to participant and/or research team availability. Visit 5 at Week 12 can vary +7 days to ensure the participant has completed 12 weeks of Camu Camu treatment prior to the end-of-treatment visit. See Section 8 Schedule of Events (Table 1) to see more test details.

\*The consent form for the optional gut biopsy will also be explained, but consent for this will not be necessary to be part of the main study. The sub-study is only available to participants at the Montreal site.  
#Optional gut biopsies will be taken for the sub-study at indicated time points.

164x68mm (150 x 150 DPI)



SPIRIT 2013 Checklist: Recommended items to address in a clinical trial protocol and related documents\*

Camu Camu pilot study (CTN PT032). Isnard et al.

| Section/item                      | Item No | Description                                                                                                                                                                                                                                                                              | Page number |
|-----------------------------------|---------|------------------------------------------------------------------------------------------------------------------------------------------------------------------------------------------------------------------------------------------------------------------------------------------|-------------|
| <b>Administrative information</b> |         |                                                                                                                                                                                                                                                                                          |             |
| Title                             | 1       | Descriptive title identifying the study design, population, interventions, and, if applicable, trial acronym                                                                                                                                                                             | 1           |
| Trial registration                | 2a      | Trial identifier and registry name. If not yet registered, name of intended registry                                                                                                                                                                                                     | 2           |
|                                   | 2b      | All items from the World Health Organization Trial Registration Data Set                                                                                                                                                                                                                 | NA          |
| Protocol version                  | 3       | Date and version identifier                                                                                                                                                                                                                                                              | 8           |
| Funding                           | 4       | Sources and types of financial, material, and other support                                                                                                                                                                                                                              | 8, 16       |
| Roles and responsibilities        | 5a      | Names, affiliations, and roles of protocol contributors                                                                                                                                                                                                                                  | 8           |
|                                   | 5b      | Name and contact information for the trial sponsor                                                                                                                                                                                                                                       | 1           |
|                                   | 5c      | Role of study sponsor and funders, if any, in study design; collection, management, analysis, and interpretation of data; writing of the report; and the decision to submit the report for publication, including whether they will have ultimate authority over any of these activities | 8           |
|                                   | 5d      | Composition, roles, and responsibilities of the coordinating centre, steering committee, endpoint adjudication committee, data management team, and other individuals or groups overseeing the trial, if applicable (see Item 21a for data monitoring committee)                         | NA          |
| <b>Introduction</b>               |         |                                                                                                                                                                                                                                                                                          |             |
| Background and rationale          | 6a      | Description of research question and justification for undertaking the trial, including summary of relevant studies (published and unpublished) examining benefits and harms for each intervention                                                                                       | 4-7         |

|    |                                                           |     |                                                                                                                                                                                                                                                                                                                                                                                |                   |
|----|-----------------------------------------------------------|-----|--------------------------------------------------------------------------------------------------------------------------------------------------------------------------------------------------------------------------------------------------------------------------------------------------------------------------------------------------------------------------------|-------------------|
| 1  |                                                           |     |                                                                                                                                                                                                                                                                                                                                                                                |                   |
| 2  |                                                           | 6b  | Explanation for choice of comparators                                                                                                                                                                                                                                                                                                                                          | 8,9               |
| 3  |                                                           |     |                                                                                                                                                                                                                                                                                                                                                                                |                   |
| 4  | Objectives                                                | 7   | Specific objectives or hypotheses                                                                                                                                                                                                                                                                                                                                              | 7,8               |
| 5  |                                                           |     |                                                                                                                                                                                                                                                                                                                                                                                |                   |
| 6  | Trial design                                              | 8   | Description of trial design including type of trial (eg, parallel group, crossover, factorial, single group), allocation ratio, and framework (eg, superiority, equivalence, noninferiority, exploratory)                                                                                                                                                                      | 8,9               |
| 7  |                                                           |     |                                                                                                                                                                                                                                                                                                                                                                                |                   |
| 8  |                                                           |     |                                                                                                                                                                                                                                                                                                                                                                                |                   |
| 9  |                                                           |     |                                                                                                                                                                                                                                                                                                                                                                                |                   |
| 10 |                                                           |     |                                                                                                                                                                                                                                                                                                                                                                                |                   |
| 11 |                                                           |     |                                                                                                                                                                                                                                                                                                                                                                                |                   |
| 12 | <b>Methods: Participants, interventions, and outcomes</b> |     |                                                                                                                                                                                                                                                                                                                                                                                |                   |
| 13 |                                                           |     |                                                                                                                                                                                                                                                                                                                                                                                |                   |
| 14 | Study setting                                             | 9   | Description of study settings (eg, community clinic, academic hospital) and list of countries where data will be collected. Reference to where list of study sites can be obtained                                                                                                                                                                                             | 9                 |
| 15 |                                                           |     |                                                                                                                                                                                                                                                                                                                                                                                |                   |
| 16 |                                                           |     |                                                                                                                                                                                                                                                                                                                                                                                |                   |
| 17 |                                                           |     |                                                                                                                                                                                                                                                                                                                                                                                |                   |
| 18 |                                                           |     |                                                                                                                                                                                                                                                                                                                                                                                |                   |
| 19 | Eligibility criteria                                      | 10  | Inclusion and exclusion criteria for participants. If applicable, eligibility criteria for study centres and individuals who will perform the interventions (eg, surgeons, psychotherapists)                                                                                                                                                                                   | 9,10              |
| 20 |                                                           |     |                                                                                                                                                                                                                                                                                                                                                                                |                   |
| 21 |                                                           |     |                                                                                                                                                                                                                                                                                                                                                                                |                   |
| 22 |                                                           |     |                                                                                                                                                                                                                                                                                                                                                                                |                   |
| 23 |                                                           |     |                                                                                                                                                                                                                                                                                                                                                                                |                   |
| 24 |                                                           |     |                                                                                                                                                                                                                                                                                                                                                                                |                   |
| 25 | Interventions                                             | 11a | Interventions for each group with sufficient detail to allow replication, including how and when they will be administered                                                                                                                                                                                                                                                     | 10,11             |
| 26 |                                                           |     |                                                                                                                                                                                                                                                                                                                                                                                |                   |
| 27 |                                                           |     |                                                                                                                                                                                                                                                                                                                                                                                |                   |
| 28 |                                                           |     |                                                                                                                                                                                                                                                                                                                                                                                |                   |
| 29 |                                                           |     |                                                                                                                                                                                                                                                                                                                                                                                |                   |
| 30 |                                                           | 11b | Criteria for discontinuing or modifying allocated interventions for a given trial participant (eg, drug dose change in response to harms, participant request, or improving/worsening disease)                                                                                                                                                                                 | 10,11             |
| 31 |                                                           |     |                                                                                                                                                                                                                                                                                                                                                                                |                   |
| 32 |                                                           |     |                                                                                                                                                                                                                                                                                                                                                                                |                   |
| 33 |                                                           |     |                                                                                                                                                                                                                                                                                                                                                                                |                   |
| 34 |                                                           |     |                                                                                                                                                                                                                                                                                                                                                                                |                   |
| 35 |                                                           | 11c | Strategies to improve adherence to intervention protocols, and any procedures for monitoring adherence (eg, drug tablet return, laboratory tests)                                                                                                                                                                                                                              | 12                |
| 36 |                                                           |     |                                                                                                                                                                                                                                                                                                                                                                                |                   |
| 37 |                                                           |     |                                                                                                                                                                                                                                                                                                                                                                                |                   |
| 38 |                                                           |     |                                                                                                                                                                                                                                                                                                                                                                                |                   |
| 39 |                                                           |     |                                                                                                                                                                                                                                                                                                                                                                                |                   |
| 40 |                                                           | 11d | Relevant concomitant care and interventions that are permitted or prohibited during the trial                                                                                                                                                                                                                                                                                  | 12                |
| 41 |                                                           |     |                                                                                                                                                                                                                                                                                                                                                                                |                   |
| 42 |                                                           |     |                                                                                                                                                                                                                                                                                                                                                                                |                   |
| 43 | Outcomes                                                  | 12  | Primary, secondary, and other outcomes, including the specific measurement variable (eg, systolic blood pressure), analysis metric (eg, change from baseline, final value, time to event), method of aggregation (eg, median, proportion), and time point for each outcome. Explanation of the clinical relevance of chosen efficacy and harm outcomes is strongly recommended | 7,8               |
| 44 |                                                           |     |                                                                                                                                                                                                                                                                                                                                                                                |                   |
| 45 |                                                           |     |                                                                                                                                                                                                                                                                                                                                                                                |                   |
| 46 |                                                           |     |                                                                                                                                                                                                                                                                                                                                                                                |                   |
| 47 |                                                           |     |                                                                                                                                                                                                                                                                                                                                                                                |                   |
| 48 |                                                           |     |                                                                                                                                                                                                                                                                                                                                                                                |                   |
| 49 |                                                           |     |                                                                                                                                                                                                                                                                                                                                                                                |                   |
| 50 |                                                           |     |                                                                                                                                                                                                                                                                                                                                                                                |                   |
| 51 |                                                           |     |                                                                                                                                                                                                                                                                                                                                                                                |                   |
| 52 | Participant timeline                                      | 13  | Time schedule of enrolment, interventions (including any run-ins and washouts), assessments, and visits for participants. A schematic diagram is highly recommended (see Figure)                                                                                                                                                                                               | Figure 1, table 1 |
| 53 |                                                           |     |                                                                                                                                                                                                                                                                                                                                                                                |                   |
| 54 |                                                           |     |                                                                                                                                                                                                                                                                                                                                                                                |                   |
| 55 |                                                           |     |                                                                                                                                                                                                                                                                                                                                                                                |                   |
| 56 |                                                           |     |                                                                                                                                                                                                                                                                                                                                                                                |                   |
| 57 |                                                           |     |                                                                                                                                                                                                                                                                                                                                                                                |                   |
| 58 |                                                           |     |                                                                                                                                                                                                                                                                                                                                                                                |                   |
| 59 |                                                           |     |                                                                                                                                                                                                                                                                                                                                                                                |                   |
| 60 |                                                           |     |                                                                                                                                                                                                                                                                                                                                                                                |                   |

|   |             |    |                                                         |   |
|---|-------------|----|---------------------------------------------------------|---|
| 1 |             |    |                                                         |   |
| 2 | Sample size | 14 | Estimated number of participants needed to achieve      | 9 |
| 3 |             |    | study objectives and how it was determined, including   |   |
| 4 |             |    | clinical and statistical assumptions supporting any     |   |
| 5 |             |    | sample size calculations                                |   |
| 6 |             |    |                                                         |   |
| 7 | Recruitment | 15 | Strategies for achieving adequate participant enrolment | 9 |
| 8 |             |    | to reach target sample size                             |   |
| 9 |             |    |                                                         |   |

### Methods: Assignment of interventions (for controlled trials)

#### Allocation:

|    |                |     |                                                            |    |
|----|----------------|-----|------------------------------------------------------------|----|
| 14 | Sequence       | 16a | Method of generating the allocation sequence (eg,          | NA |
| 15 | generation     |     | computer-generated random numbers), and list of any        |    |
| 16 |                |     | factors for stratification. To reduce predictability of a  |    |
| 17 |                |     | random sequence, details of any planned restriction (eg,   |    |
| 18 |                |     | blocking) should be provided in a separate document that   |    |
| 19 |                |     | is unavailable to those who enrol participants or assign   |    |
| 20 |                |     | interventions                                              |    |
| 21 |                |     |                                                            |    |
| 22 |                |     |                                                            |    |
| 23 |                |     |                                                            |    |
| 24 | Allocation     | 16b | Mechanism of implementing the allocation sequence (eg,     | NA |
| 25 | concealment    |     | central telephone; sequentially numbered, opaque,          |    |
| 26 | mechanism      |     | sealed envelopes), describing any steps to conceal the     |    |
| 27 |                |     | sequence until interventions are assigned                  |    |
| 28 |                |     |                                                            |    |
| 29 |                |     |                                                            |    |
| 30 | Implementation | 16c | Who will generate the allocation sequence, who will enrol  | NA |
| 31 |                |     | participants, and who will assign participants to          |    |
| 32 |                |     | interventions                                              |    |
| 33 |                |     |                                                            |    |
| 34 | Blinding       | 17a | Who will be blinded after assignment to interventions (eg, | NA |
| 35 | (masking)      |     | trial participants, care providers, outcome assessors,     |    |
| 36 |                |     | data analysts), and how                                    |    |
| 37 |                |     |                                                            |    |
| 38 |                |     |                                                            |    |
| 39 |                | 17b | If blinded, circumstances under which unblinding is        | NA |
| 40 |                |     | permissible, and procedure for revealing a participant's   |    |
| 41 |                |     | allocated intervention during the trial                    |    |
| 42 |                |     |                                                            |    |

### Methods: Data collection, management, and analysis

|    |                 |     |                                                             |       |
|----|-----------------|-----|-------------------------------------------------------------|-------|
| 45 | Data collection | 18a | Plans for assessment and collection of outcome,             | 12,13 |
| 46 | methods         |     | baseline, and other trial data, including any related       |       |
| 47 |                 |     | processes to promote data quality (eg, duplicate            |       |
| 48 |                 |     | measurements, training of assessors) and a description      |       |
| 49 |                 |     | of study instruments (eg, questionnaires, laboratory        |       |
| 50 |                 |     | tests) along with their reliability and validity, if known. |       |
| 51 |                 |     | Reference to where data collection forms can be found, if   |       |
| 52 |                 |     | not in the protocol                                         |       |
| 53 |                 |     |                                                             |       |
| 54 |                 |     |                                                             |       |
| 55 |                 |     |                                                             |       |
| 56 |                 | 18b | Plans to promote participant retention and complete         | 13    |
| 57 |                 |     | follow-up, including list of any outcome data to be         |       |
| 58 |                 |     | collected for participants who discontinue or deviate from  |       |
| 59 |                 |     | intervention protocols                                      |       |
| 60 |                 |     |                                                             |       |

|    |                                 |     |                                                             |       |
|----|---------------------------------|-----|-------------------------------------------------------------|-------|
| 1  |                                 |     |                                                             |       |
| 2  | Data                            | 19  | Plans for data entry, coding, security, and storage,        | NA    |
| 3  | management                      |     | including any related processes to promote data quality     |       |
| 4  |                                 |     | (eg, double data entry; range checks for data values).      |       |
| 5  |                                 |     | Reference to where details of data management               |       |
| 6  |                                 |     | procedures can be found, if not in the protocol             |       |
| 7  |                                 |     |                                                             |       |
| 8  |                                 |     |                                                             |       |
| 9  | Statistical                     | 20a | Statistical methods for analysing primary and secondary     | 13    |
| 10 | methods                         |     | outcomes. Reference to where other details of the           |       |
| 11 |                                 |     | statistical analysis plan can be found, if not in the       |       |
| 12 |                                 |     | protocol                                                    |       |
| 13 |                                 |     |                                                             |       |
| 14 |                                 | 20b | Methods for any additional analyses (eg, subgroup and       | 13    |
| 15 |                                 |     | adjusted analyses)                                          |       |
| 16 |                                 |     |                                                             |       |
| 17 |                                 | 20c | Definition of analysis population relating to protocol non- | NA    |
| 18 |                                 |     | adherence (eg, as randomised analysis), and any             |       |
| 19 |                                 |     | statistical methods to handle missing data (eg, multiple    |       |
| 20 |                                 |     | imputation)                                                 |       |
| 21 |                                 |     |                                                             |       |
| 22 |                                 |     |                                                             |       |
| 23 | <b>Methods: Monitoring</b>      |     |                                                             |       |
| 24 |                                 |     |                                                             |       |
| 25 | Data monitoring                 | 21a | Composition of data monitoring committee (DMC);             | 12    |
| 26 |                                 |     | summary of its role and reporting structure; statement of   |       |
| 27 |                                 |     | whether it is independent from the sponsor and              |       |
| 28 |                                 |     | competing interests; and reference to where further         |       |
| 29 |                                 |     | details about its charter can be found, if not in the       |       |
| 30 |                                 |     | protocol. Alternatively, an explanation of why a DMC is     |       |
| 31 |                                 |     | not needed                                                  |       |
| 32 |                                 |     |                                                             |       |
| 33 |                                 |     |                                                             |       |
| 34 |                                 | 21b | Description of any interim analyses and stopping            | 12    |
| 35 |                                 |     | guidelines, including who will have access to these         |       |
| 36 |                                 |     | interim results and make the final decision to terminate    |       |
| 37 |                                 |     | the trial                                                   |       |
| 38 |                                 |     |                                                             |       |
| 39 |                                 |     |                                                             |       |
| 40 | Harms                           | 22  | Plans for collecting, assessing, reporting, and managing    | 11,12 |
| 41 |                                 |     | solicited and spontaneously reported adverse events and     |       |
| 42 |                                 |     | other unintended effects of trial interventions or trial    |       |
| 43 |                                 |     | conduct                                                     |       |
| 44 |                                 |     |                                                             |       |
| 45 |                                 |     |                                                             |       |
| 46 | Auditing                        | 23  | Frequency and procedures for auditing trial conduct, if     | 9     |
| 47 |                                 |     | any, and whether the process will be independent from       |       |
| 48 |                                 |     | investigators and the sponsor                               |       |
| 49 |                                 |     |                                                             |       |
| 50 |                                 |     |                                                             |       |
| 51 | <b>Ethics and dissemination</b> |     |                                                             |       |
| 52 |                                 |     |                                                             |       |
| 53 | Research ethics                 | 24  | Plans for seeking research ethics committee/institutional   |       |
| 54 | approval                        |     | review board (REC/IRB) approval                             |       |
| 55 |                                 |     |                                                             |       |
| 56 |                                 |     |                                                             |       |
| 57 |                                 |     |                                                             |       |
| 58 |                                 |     |                                                             |       |
| 59 |                                 |     |                                                             |       |
| 60 |                                 |     |                                                             |       |

|    |                   |     |                                                                |            |
|----|-------------------|-----|----------------------------------------------------------------|------------|
| 1  |                   |     |                                                                |            |
| 2  | Protocol          | 25  | Plans for communicating important protocol modifications       | 14         |
| 3  | amendments        |     | (eg, changes to eligibility criteria, outcomes, analyses) to   |            |
| 4  |                   |     | relevant parties (eg, investigators, REC/IRBs, trial           |            |
| 5  |                   |     | participants, trial registries, journals, regulators)          |            |
| 6  |                   |     |                                                                |            |
| 7  | Consent or assent | 26a | Who will obtain informed consent or assent from potential      | 9          |
| 8  |                   |     | trial participants or authorised surrogates, and how (see      |            |
| 9  |                   |     | Item 32)                                                       |            |
| 10 |                   |     |                                                                |            |
| 11 |                   |     |                                                                |            |
| 12 |                   | 26b | Additional consent provisions for collection and use of        | 9, table 1 |
| 13 |                   |     | participant data and biological specimens in ancillary         |            |
| 14 |                   |     | studies, if applicable                                         |            |
| 15 |                   |     |                                                                |            |
| 16 | Confidentiality   | 27  | How personal information about potential and enrolled          | 14         |
| 17 |                   |     | participants will be collected, shared, and maintained in      |            |
| 18 |                   |     | order to protect confidentiality before, during, and after     |            |
| 19 |                   |     | the trial                                                      |            |
| 20 |                   |     |                                                                |            |
| 21 |                   |     |                                                                |            |
| 22 | Declaration of    | 28  | Financial and other competing interests for principal          | 16,17      |
| 23 | interests         |     | investigators for the overall trial and each study site        |            |
| 24 |                   |     |                                                                |            |
| 25 | Access to data    | 29  | Statement of who will have access to the final trial           | 17         |
| 26 |                   |     | dataset, and disclosure of contractual agreements that         |            |
| 27 |                   |     | limit such access for investigators                            |            |
| 28 |                   |     |                                                                |            |
| 29 |                   |     |                                                                |            |
| 30 | Ancillary and     | 30  | Provisions, if any, for ancillary and post-trial care, and for | 11,12      |
| 31 | post-trial care   |     | compensation to those who suffer harm from trial               |            |
| 32 |                   |     | participation                                                  |            |
| 33 |                   |     |                                                                |            |
| 34 | Dissemination     | 31a | Plans for investigators and sponsor to communicate trial       | 14         |
| 35 | policy            |     | results to participants, healthcare professionals, the         |            |
| 36 |                   |     | public, and other relevant groups (eg, via publication,        |            |
| 37 |                   |     | reporting in results databases, or other data sharing          |            |
| 38 |                   |     | arrangements), including any publication restrictions          |            |
| 39 |                   |     |                                                                |            |
| 40 |                   |     |                                                                |            |
| 41 |                   | 31b | Authorship eligibility guidelines and any intended use of      | NA         |
| 42 |                   |     | professional writers                                           |            |
| 43 |                   |     |                                                                |            |
| 44 |                   | 31c | Plans, if any, for granting public access to the full          | 14         |
| 45 |                   |     | protocol, participant-level dataset, and statistical code      |            |
| 46 |                   |     |                                                                |            |
| 47 |                   |     |                                                                |            |
| 48 | <b>Appendices</b> |     |                                                                |            |
| 49 |                   |     |                                                                |            |
| 50 | Informed consent  | 32  | Model consent form and other related documentation             | NA         |
| 51 | materials         |     | given to participants and authorised surrogates                |            |
| 52 |                   |     |                                                                |            |
| 53 | Biological        | 33  | Plans for collection, laboratory evaluation, and storage of    | NA         |
| 54 | specimens         |     | biological specimens for genetic or molecular analysis in      |            |
| 55 |                   |     | the current trial and for future use in ancillary studies, if  |            |
| 56 |                   |     | applicable                                                     |            |
| 57 |                   |     |                                                                |            |

\*It is strongly recommended that this checklist be read in conjunction with the SPIRIT 2013 Explanation & Elaboration for important clarification on the items. Amendments to the



1  
2  
3  
4  
5  
6  
7  
8  
9  
10  
11  
12  
13  
14  
15  
16  
17  
18  
19  
20  
21  
22  
23  
24  
25  
26  
27  
28  
29  
30  
31  
32  
33  
34  
35  
36  
37  
38  
39  
40  
41  
42  
43  
44  
45  
46  
47  
48  
49  
50  
51  
52  
53  
54  
55  
56  
57  
58  
59  
60

protocol should be tracked and dated. The SPIRIT checklist is copyrighted by the SPIRIT Group under the Creative Commons "[Attribution-NonCommercial-NoDerivs 3.0 Unported](#)" license.

For peer review only
